# Supplementary material for: 15-lncRNA-Based Classifier-Clinicopathologic Nomogram Improves the Prediction of Recurrence in Patients with Hepatocellular Carcinoma
Source: Dis Markers. 2020 Dec 1;2020:9180732. doi: 10.1155/2020/9180732 (PMC7817238; doi:10.1155/2020/9180732)
Supplement: Supplementary 1 — Based on the primary filter criteria mentioned in the methods section, we obtained a list of 1160 different lncRNAs. [file 9180732.f1.xls]

## Sheet: DiffGene
LncRNA	logFC	logCPM	PValue	FDR
AC018904.2|ENSG00000259476|sense_intronic	-5.42644	5.78762	4.76464e-62	4.65076e-58
AL121992.3|ENSG00000272510|antisense	-2.61989	7.22382	1.23088e-53	6.00732e-50
AL359694.2|ENSG00000261568|lincRNA	-4.86159	5.63116	1.07317e-48	3.49172e-45
AL359815.1|ENSG00000233431|antisense	-4.73926	3.91459	2.13022e-37	5.19828e-34
AL162377.1|ENSG00000231856|antisense	-2.72458	7.15035	4.80103e-36	9.37257e-33
AC006960.2|ENSG00000237400|antisense	-5.15207	1.45124	3.52897e-29	5.74105e-26
AC012073.1|ENSG00000271936|antisense	-2.9098	8.98074	4.20285e-27	5.86058e-24
AL645608.3|ENSG00000230699|lincRNA	-3.25002	3.91259	3.19258e-24	3.89534e-21
CAPN10-AS1|ENSG00000260942|antisense	3.15293	6.34904	6.80839e-24	7.38408e-21
AC068535.1|ENSG00000227157|lincRNA	-3.51004	4.91507	3.06499e-22	2.99174e-19
BX255923.1|ENSG00000225655|lincRNA	-3.34621	4.87942	7.71804e-22	6.84871e-19
AC011840.3|ENSG00000263860|lincRNA	-2.27005	0.540754	1.54227e-21	1.25451e-18
AC138356.1|ENSG00000183154|antisense	-2.44296	5.10707	3.3148e-21	2.4889e-18
AC096642.1|ENSG00000277007|lincRNA	2.04912	4.28051	4.91295e-21	3.42538e-18
AL353803.4|ENSG00000261334|lincRNA	-2.85014	4.78636	9.17907e-21	5.97313e-18
AC003985.1|ENSG00000233824|lincRNA	-3.08114	3.08017	1.60818e-20	9.81089e-18
AC118555.1|ENSG00000235096|antisense	-3.74189	2.95638	1.23197e-18	7.07367e-16
PLA2G4C-AS1|ENSG00000269420|antisense	3.16329	5.81225	4.23966e-18	2.17807e-15
AP003419.3|ENSG00000274251|lincRNA	-2.70412	1.93058	5.75397e-18	2.80823e-15
HOTTIP|ENSG00000243766|antisense	7.04114	5.87245	1.0856e-17	5.04599e-15
LINC02475|ENSG00000251350|lincRNA	4.82325	4.3673	1.36053e-17	6.03644e-15
AC107396.1|ENSG00000251049|lincRNA	-4.18961	2.21733	2.60691e-17	1.10635e-14
LINC01419|ENSG00000253898|lincRNA	10.1623	9.04061	2.86517e-17	1.15808e-14
LINC02438|ENSG00000248238|lincRNA	6.0308	6.22605	2.96609e-17	1.15808e-14
AL050349.1|ENSG00000229188|antisense	-2.40649	1.46109	5.31215e-17	1.9943e-14
LINC00479|ENSG00000236384|lincRNA	-2.52516	6.7537	5.71497e-17	2.06607e-14
AC096577.1|ENSG00000248373|lincRNA	-4.25325	1.93329	1.34336e-16	4.68304e-14
FENDRR|ENSG00000268388|lincRNA	-2.42148	3.79929	2.00599e-15	6.31627e-13
LINC01980|ENSG00000225548|lincRNA	5.98084	5.79439	4.9897e-15	1.47589e-12
AL807757.2|ENSG00000236095|sense_intronic	3.25539	6.07855	6.64175e-15	1.90677e-12
LINC00907|ENSG00000267586|lincRNA	-3.3638	4.10346	7.82811e-15	2.18315e-12
LINC01516|ENSG00000231422|lincRNA	-3.02494	7.01059	9.1242e-15	2.47393e-12
LINC01818|ENSG00000230645|lincRNA	-2.81394	2.40957	1.371e-14	3.61683e-12
AC011481.1|ENSG00000267114|lincRNA	3.01006	5.93424	1.70787e-14	4.38698e-12
AC105118.1|ENSG00000253931|antisense	6.62478	4.7774	1.8579e-14	4.64998e-12
SFTA1P|ENSG00000225383|lincRNA	6.1523	3.48015	3.05235e-14	7.44851e-12
AFAP1-AS1|ENSG00000272620|antisense	4.77016	8.19155	3.33865e-14	7.94843e-12
LINC02109|ENSG00000259786|lincRNA	5.20126	4.81845	3.95077e-14	9.18178e-12
AC092119.2|ENSG00000274460|processed_transcript	2.21215	4.37417	8.02013e-14	1.77919e-11
AP000915.1|ENSG00000264514|lincRNA	4.34315	1.11678	1.31999e-13	2.78656e-11
AC023389.1|ENSG00000263657|antisense	-2.29235	2.84046	1.34175e-13	2.78656e-11
LINC01019|ENSG00000248118|lincRNA	5.19454	4.14134	3.71279e-13	7.55012e-11
AC004080.2|ENSG00000253508|lincRNA	3.40068	3.54	4.87825e-13	9.71768e-11
AC000067.1|ENSG00000225007|lincRNA	4.09035	1.07552	8.29021e-13	1.58668e-10
HTR2A-AS1|ENSG00000224517|antisense	-2.52461	1.14531	9.46909e-13	1.77746e-10
AC006387.1|ENSG00000243193|processed_transcript	-2.27513	3.74693	1.20191e-12	2.21356e-10
HOXD-AS2|ENSG00000237380|antisense	4.41244	3.2948	1.72664e-12	3.0096e-10
AC074327.1|ENSG00000228651|antisense	6.29513	7.04318	1.90926e-12	3.26953e-10
AC010547.1|ENSG00000247324|antisense	2.85322	4.53069	3.42488e-12	5.66614e-10
AL512407.1|ENSG00000228777|lincRNA	5.93861	4.07667	3.58522e-12	5.7732e-10
AL023803.2|ENSG00000274825|lincRNA	3.12398	3.79794	5.23352e-12	7.85914e-10
LINC00628|ENSG00000280924|lincRNA	3.37368	2.5001	6.9062e-12	1.00614e-09
SACS-AS1|ENSG00000229558|lincRNA	6.33317	4.56746	8.24179e-12	1.18306e-09
AL731684.1|ENSG00000225532|lincRNA	4.60818	3.02768	8.8337e-12	1.23779e-09
AL592182.1|ENSG00000233407|antisense	7.0156	2.69801	8.87671e-12	1.23779e-09
AC011474.2|ENSG00000266248|antisense	7.31142	4.4728	1.0541e-11	1.44916e-09
AC094104.2|ENSG00000251132|lincRNA	8.76946	4.50916	1.5514e-11	2.10322e-09
AL136460.1|ENSG00000230437|lincRNA	6.7837	3.6199	1.76904e-11	2.33346e-09
ANKRD34C-AS1|ENSG00000259234|lincRNA	6.1318	3.97287	1.80968e-11	2.35524e-09
AP002478.1|ENSG00000266401|antisense	3.98631	2.86042	2.18818e-11	2.77387e-09
HAO2-IT1|ENSG00000230921|sense_intronic	-2.24049	2.6904	2.47036e-11	3.07485e-09
AC024230.1|ENSG00000248515|lincRNA	4.74412	3.02419	2.48861e-11	3.07485e-09
AC026369.3|ENSG00000256948|antisense	-2.46947	2.37586	2.66486e-11	3.25146e-09
AC092155.1|ENSG00000226622|antisense	-2.96731	1.94648	3.13231e-11	3.77463e-09
LINC01891|ENSG00000231682|lincRNA	-2.97803	0.563826	3.52082e-11	4.14057e-09
AL390856.1|ENSG00000232309|lincRNA	3.81574	4.00837	3.76199e-11	4.37153e-09
AC126773.1|ENSG00000260084|antisense	3.45892	2.67173	4.06079e-11	4.66322e-09
AC023983.2|ENSG00000273321|lincRNA	3.2565	4.69678	4.22691e-11	4.7424e-09
AC129492.4|ENSG00000266824|lincRNA	-2.35237	7.86122	4.46532e-11	4.95296e-09
AC007557.1|ENSG00000227021|lincRNA	3.67731	2.97558	5.60807e-11	6.1506e-09
LINC01585|ENSG00000245479|sense_overlapping	4.19454	4.65406	5.74588e-11	6.23173e-09
NCOA7-AS1|ENSG00000232131|antisense	-2.1551	2.06774	6.32014e-11	6.70553e-09
AF165147.1|ENSG00000232855|lincRNA	-2.65924	3.43877	7.6326e-11	7.92573e-09
AL731897.1|ENSG00000228714|lincRNA	8.19094	3.75046	8.36821e-11	8.59812e-09
LINC01093|ENSG00000249173|lincRNA	-3.50178	8.45845	8.86963e-11	9.01838e-09
AP002449.1|ENSG00000266969|antisense	-2.18449	7.73185	1.15835e-10	1.16563e-08
AP000593.3|ENSG00000255843|antisense	4.92835	4.81105	1.25694e-10	1.25194e-08
AC034195.1|ENSG00000223727|lincRNA	6.54924	4.73623	1.28272e-10	1.26471e-08
LINC02163|ENSG00000251026|lincRNA	2.58291	4.63255	1.53533e-10	1.48379e-08
AC100791.2|ENSG00000262768|antisense	2.66545	2.73117	1.67908e-10	1.60681e-08
AC093895.1|ENSG00000249001|antisense	4.66863	3.77439	2.01789e-10	1.89877e-08
U47924.1|ENSG00000271969|antisense	3.79868	1.06989	2.02307e-10	1.89877e-08
AC104088.1|ENSG00000232555|lincRNA	2.53025	2.46302	2.27312e-10	2.11313e-08
AC004461.2|ENSG00000281530|sense_intronic	4.74161	6.21004	2.60081e-10	2.37257e-08
AC011632.1|ENSG00000253706|antisense	6.20879	3.56916	2.79858e-10	2.52935e-08
AL445434.1|ENSG00000230269|lincRNA	3.46055	3.51026	2.8894e-10	2.56395e-08
AC117386.2|ENSG00000243944|antisense	2.52112	4.63843	2.95833e-10	2.60147e-08
AC245100.6|ENSG00000238107|lincRNA	7.79002	5.7756	3.17432e-10	2.76648e-08
AL161785.2|ENSG00000235007|lincRNA	3.93491	1.90908	3.29314e-10	2.84463e-08
AC011498.7|ENSG00000267769|antisense	4.07784	4.44	3.49639e-10	2.99371e-08
AC024560.1|ENSG00000236833|lincRNA	2.06222	5.05083	3.72686e-10	3.1633e-08
AL357060.1|ENSG00000230533|lincRNA	4.23897	4.01598	3.85023e-10	3.23984e-08
AC022424.1|ENSG00000250579|antisense	6.3688	4.6867	3.96048e-10	3.30412e-08
LINC01793|ENSG00000222030|lincRNA	5.15917	2.65107	4.17485e-10	3.44696e-08
AL133166.1|ENSG00000257522|processed_transcript	5.00232	2.02544	4.20232e-10	3.44696e-08
Z99755.3|ENSG00000279184|antisense	2.49457	3.99942	5.08153e-10	4.09924e-08
AL355802.3|ENSG00000271754|antisense	2.11177	4.0635	6.00735e-10	4.80638e-08
AC073641.1|ENSG00000228802|antisense	5.04183	6.03035	6.0982e-10	4.83939e-08
LINC02241|ENSG00000251629|lincRNA	9.0558	5.67548	6.21519e-10	4.89246e-08
AL590093.1|ENSG00000230728|sense_overlapping	-2.46002	0.965025	6.59569e-10	5.15044e-08
AC008938.1|ENSG00000260072|lincRNA	-2.13314	0.644571	7.37421e-10	5.71267e-08
AC011453.1|ENSG00000269842|lincRNA	2.79878	4.14862	7.4896e-10	5.75637e-08
LINC00355|ENSG00000227674|lincRNA	4.45133	5.0398	7.86899e-10	6.00072e-08
LINC01121|ENSG00000205054|processed_transcript	4.55165	2.929	8.32761e-10	6.30123e-08
AL445426.1|ENSG00000231246|lincRNA	3.44142	5.87466	8.51303e-10	6.39197e-08
AC078993.1|ENSG00000238178|antisense	2.453	5.66961	9.09931e-10	6.75185e-08
HOXA11-AS|ENSG00000240990|antisense	5.91752	3.18929	9.19984e-10	6.75185e-08
AL591501.1|ENSG00000233928|lincRNA	4.20828	1.32327	9.46982e-10	6.86619e-08
MAFA-AS1|ENSG00000254338|antisense	8.29404	4.40864	9.49632e-10	6.86619e-08
MIR137HG|ENSG00000225206|lincRNA	3.00891	3.00201	9.58187e-10	6.87389e-08
AC092059.1|ENSG00000239991|lincRNA	4.62096	3.16882	9.65824e-10	6.87389e-08
LINC02159|ENSG00000253417|lincRNA	4.53819	3.79453	9.71824e-10	6.87389e-08
AL035401.1|ENSG00000233358|lincRNA	5.15777	1.86162	1.00236e-09	7.03884e-08
AP003469.2|ENSG00000253395|lincRNA	2.96928	2.98825	1.05683e-09	7.36839e-08
LRP4-AS1|ENSG00000247675|antisense	3.7451	3.05034	1.08917e-09	7.53999e-08
RASGRF2-AS1|ENSG00000251450|antisense	4.21032	1.20638	1.18708e-09	8.10284e-08
HAGLR|ENSG00000224189|antisense	6.32718	7.75111	1.26132e-09	8.54985e-08
AL450442.1|ENSG00000258850|lincRNA	-2.27346	2.44104	1.413e-09	9.50297e-08
AC106900.2|ENSG00000270460|lincRNA	5.31886	2.63506	1.44865e-09	9.61922e-08
AC091152.2|ENSG00000267160|antisense	3.55	9.52553	1.6145e-09	1.0593e-07
LINC00114|ENSG00000223806|lincRNA	3.31121	2.60293	1.61701e-09	1.0593e-07
AC034229.4|ENSG00000272417|lincRNA	2.74242	2.32581	1.72056e-09	1.1193e-07
AC099791.2|ENSG00000271200|lincRNA	2.10437	1.47053	1.73152e-09	1.1193e-07
LINC01234|ENSG00000249550|lincRNA	5.4991	6.10217	1.75856e-09	1.1293e-07
AC006064.3|ENSG00000255966|antisense	3.03824	3.61643	1.8254e-09	1.16456e-07
AL162582.1|ENSG00000230234|lincRNA	5.09232	5.23289	1.86609e-09	1.18279e-07
AC074138.1|ENSG00000276071|lincRNA	2.77705	2.708	1.90524e-09	1.19981e-07
AC003985.2|ENSG00000260951|lincRNA	5.83622	4.61588	1.93746e-09	1.21228e-07
PKIA-AS1|ENSG00000254266|lincRNA	4.77214	1.93598	2.41688e-09	1.49311e-07
AL355388.2|ENSG00000273002|antisense	3.78712	3.09973	2.6194e-09	1.60805e-07
AC017002.3|ENSG00000240350|lincRNA	3.07657	2.2555	2.66414e-09	1.62529e-07
LINC01593|ENSG00000231221|lincRNA	3.49762	1.80069	2.68247e-09	1.62631e-07
LINC01492|ENSG00000225564|lincRNA	-2.20861	3.75224	2.73687e-09	1.64905e-07
AC005725.1|ENSG00000264727|lincRNA	2.3437	2.04337	2.7821e-09	1.66601e-07
LINC00895|ENSG00000281548|lincRNA	4.74978	2.10782	2.81073e-09	1.6729e-07
AC025254.1|ENSG00000258125|lincRNA	7.77589	3.36164	2.96698e-09	1.74462e-07
MLIP-IT1|ENSG00000236996|sense_intronic	2.80897	5.71425	3.12082e-09	1.82409e-07
BX119904.2|ENSG00000230159|lincRNA	3.875	1.73508	3.27157e-09	1.90082e-07
AC097515.1|ENSG00000248138|antisense	3.0213	2.15502	3.33422e-09	1.91611e-07
AC066612.1|ENSG00000259235|lincRNA	3.41016	3.80021	3.33715e-09	1.91611e-07
AP001922.3|ENSG00000254826|sense_intronic	-2.03178	2.44425	3.60405e-09	2.03348e-07
LINC01833|ENSG00000259439|lincRNA	7.31993	4.48222	3.65641e-09	2.05116e-07
AC125603.1|ENSG00000257654|lincRNA	3.98122	2.46834	3.8793e-09	2.16376e-07
LINC01507|ENSG00000230945|lincRNA	-2.63931	1.28013	4.17842e-09	2.31736e-07
LINC01194|ENSG00000248131|lincRNA	7.84406	3.94803	4.34427e-09	2.39573e-07
AP002505.1|ENSG00000267177|antisense	4.27168	1.68278	4.50346e-09	2.45577e-07
LINC02404|ENSG00000257893|lincRNA	7.17432	4.6147	4.53312e-09	2.45821e-07
AC116025.2|ENSG00000262172|sense_intronic	4.26231	2.32894	4.74398e-09	2.55834e-07
AC007950.2|ENSG00000276651|lincRNA	2.61661	5.24201	4.80403e-09	2.57649e-07
AC116366.2|ENSG00000238160|antisense	2.61102	3.0159	5.05038e-09	2.6817e-07
AC012213.4|ENSG00000271830|lincRNA	5.20993	2.1369	5.05742e-09	2.6817e-07
LINC01168|ENSG00000240707|lincRNA	3.36729	3.49844	5.08262e-09	2.6817e-07
AC005381.1|ENSG00000267243|lincRNA	5.79281	2.93676	5.16924e-09	2.71274e-07
AC016710.1|ENSG00000229131|lincRNA	7.58176	3.18239	5.43628e-09	2.82253e-07
L34079.2|ENSG00000269177|antisense	6.00093	2.17436	5.49897e-09	2.83997e-07
LINC02335|ENSG00000278630|lincRNA	2.74034	2.99394	5.64389e-09	2.89948e-07
TMEM132D-AS1|ENSG00000249196|antisense	8.06883	4.55045	5.6941e-09	2.90995e-07
LINC02152|ENSG00000261319|lincRNA	4.28231	1.95363	5.80556e-09	2.95146e-07
AL356215.1|ENSG00000255521|antisense	6.07385	5.28718	5.98241e-09	3.02561e-07
AC103724.4|ENSG00000271938|lincRNA	3.85135	4.52417	6.0416e-09	3.0398e-07
AC135012.1|ENSG00000261177|lincRNA	5.0776	3.84516	6.08095e-09	3.0439e-07
AL162413.1|ENSG00000270372|lincRNA	7.09865	3.9739	6.52914e-09	3.24138e-07
AC016550.2|ENSG00000248363|lincRNA	4.35416	2.49438	6.55133e-09	3.24138e-07
AC008060.1|ENSG00000218672|lincRNA	5.56308	2.02904	6.60828e-09	3.24138e-07
AC011595.3|ENSG00000257890|lincRNA	2.45509	2.66334	6.72166e-09	3.28051e-07
FEZF1-AS1|ENSG00000230316|antisense	5.53801	5.41805	6.87706e-09	3.30675e-07
AC106864.2|ENSG00000250046|lincRNA	4.82489	3.64825	6.97934e-09	3.33948e-07
AC138028.3|ENSG00000259813|antisense	3.56092	1.56186	7.04591e-09	3.35488e-07
AC100872.1|ENSG00000263443|lincRNA	-2.19339	7.31946	7.19874e-09	3.41102e-07
LINC01754|ENSG00000224565|lincRNA	3.09626	2.63371	7.35185e-09	3.46674e-07
AC079061.1|ENSG00000248050|antisense	-2.28333	5.90068	7.46228e-09	3.50189e-07
MAGI2-AS1|ENSG00000251276|antisense	4.14856	0.815164	7.65922e-09	3.57711e-07
AC005342.1|ENSG00000203593|antisense	2.78535	3.9592	7.73714e-09	3.5963e-07
AC108752.1|ENSG00000240241|lincRNA	4.91655	3.2267	8.62229e-09	3.93281e-07
LINC01666|ENSG00000279579|lincRNA	4.64749	2.97618	8.89747e-09	4.03945e-07
AC091939.1|ENSG00000254135|lincRNA	4.25353	1.17872	8.95601e-09	4.0472e-07
AC012625.1|ENSG00000251361|lincRNA	2.74586	2.79265	9.54358e-09	4.29285e-07
AL136987.1|ENSG00000232498|antisense	5.98243	4.29464	1.00379e-08	4.49448e-07
LINC00648|ENSG00000259129|lincRNA	4.29571	4.09088	1.05203e-08	4.66765e-07
AC005393.1|ENSG00000276445|lincRNA	2.47321	2.50209	1.06663e-08	4.71102e-07
AC022679.1|ENSG00000253857|lincRNA	4.66469	1.37124	1.09371e-08	4.8089e-07
AC091987.1|ENSG00000253584|lincRNA	6.13928	2.60541	1.09948e-08	4.81256e-07
AC009955.2|ENSG00000267919|lincRNA	2.3484	1.25387	1.11896e-08	4.87599e-07
AC097381.1|ENSG00000228919|lincRNA	3.82352	3.60889	1.21452e-08	5.26884e-07
AC010280.2|ENSG00000248884|lincRNA	-2.73065	4.74063	1.29378e-08	5.58786e-07
AC063980.1|ENSG00000279240|lincRNA	5.88924	11.77	1.31951e-08	5.6739e-07
AL391845.2|ENSG00000233542|antisense	4.46831	2.92945	1.33023e-08	5.69492e-07
LINC-ROR|ENSG00000258609|lincRNA	4.03018	2.64968	1.36126e-08	5.80231e-07
LINC01646|ENSG00000232596|lincRNA	3.98884	3.06642	1.41436e-08	6.00241e-07
LINC01248|ENSG00000224128|antisense	5.12039	2.31438	1.42573e-08	6.02449e-07
LINC01122|ENSG00000233723|lincRNA	3.04977	4.88433	1.43638e-08	6.04333e-07
P4HA2-AS1|ENSG00000237714|antisense	4.23945	2.96675	1.4548e-08	6.09457e-07
HOXA-AS3|ENSG00000254369|antisense	3.2151	2.18159	1.50504e-08	6.27807e-07
AL117329.1|ENSG00000224271|lincRNA	6.50654	2.68052	1.55631e-08	6.46433e-07
AC005150.1|ENSG00000248431|lincRNA	8.98761	5.25204	1.62442e-08	6.71861e-07
AL365181.3|ENSG00000272405|antisense	4.40477	9.04206	1.63928e-08	6.7231e-07
AC109830.1|ENSG00000251199|lincRNA	2.13943	2.59234	1.6698e-08	6.81962e-07
AC015712.6|ENSG00000272808|processed_transcript	3.47399	5.74707	1.68891e-08	6.86892e-07
AL132657.2|ENSG00000260137|lincRNA	2.2251	1.44849	1.71058e-08	6.92822e-07
AC106771.1|ENSG00000248783|lincRNA	5.39998	2.19269	1.74622e-08	6.99553e-07
AC090673.2|ENSG00000256083|antisense	4.00622	0.499548	1.7487e-08	6.99553e-07
AP003696.1|ENSG00000253385|lincRNA	3.93318	3.85701	1.75911e-08	7.00845e-07
AC114316.2|ENSG00000250049|lincRNA	4.69041	2.95222	1.80259e-08	7.15246e-07
SLC7A11-AS1|ENSG00000250033|processed_transcript	4.00057	2.30326	1.83048e-08	7.23373e-07
AL121832.3|ENSG00000275437|sense_intronic	2.10981	3.72303	1.89057e-08	7.44105e-07
WWTR1-IT1|ENSG00000241985|sense_intronic	-2.48033	8.27876	1.94756e-08	7.6346e-07
AC061975.6|ENSG00000266830|lincRNA	3.77199	3.61029	1.97247e-08	7.67062e-07
AC105137.3|ENSG00000276744|sense_intronic	2.48158	2.78119	1.99132e-08	7.69998e-07
AC002463.1|ENSG00000223646|lincRNA	4.38042	2.93052	1.99579e-08	7.69998e-07
LINC00620|ENSG00000224514|antisense	4.06155	6.01897	2.03822e-08	7.80566e-07
AL031587.2|ENSG00000233739|antisense	2.06912	2.01348	2.03918e-08	7.80566e-07
LINC02334|ENSG00000274317|lincRNA	2.79787	5.80344	2.09217e-08	7.97721e-07
AL139327.2|ENSG00000232243|lincRNA	3.45164	0.991502	2.20381e-08	8.37021e-07
AC067930.2|ENSG00000254741|antisense	-2.15219	0.151407	2.23787e-08	8.43391e-07
LINC01468|ENSG00000231131|lincRNA	5.16367	1.19991	2.30263e-08	8.6115e-07
AC067852.1|ENSG00000266929|processed_transcript	4.51889	3.85073	2.38001e-08	8.86691e-07
C8orf87|ENSG00000279847|lincRNA	3.21552	1.53498	2.47585e-08	9.17749e-07
AL136537.2|ENSG00000261761|processed_transcript	7.03227	3.14623	2.50099e-08	9.17749e-07
LINC01192|ENSG00000241369|lincRNA	4.31349	1.47656	2.60881e-08	9.50173e-07
AC069277.1|ENSG00000189229|lincRNA	4.80909	2.97799	2.69325e-08	9.7728e-07
AC092168.2|ENSG00000232034|sense_intronic	3.09205	5.75196	2.7694e-08	1.00119e-06
AC013448.2|ENSG00000235610|lincRNA	3.37823	3.25605	2.87124e-08	1.03037e-06
AL121906.2|ENSG00000275223|lincRNA	3.22974	4.13249	2.96082e-08	1.05863e-06
CLRN1-AS1|ENSG00000239265|antisense	-2.67889	2.75479	2.99839e-08	1.06815e-06
AC099552.1|ENSG00000217825|lincRNA	6.40282	2.82412	3.06379e-08	1.07658e-06
AC024614.2|ENSG00000265689|lincRNA	2.47003	1.6609	3.06381e-08	1.07658e-06
AC027013.1|ENSG00000258489|lincRNA	3.12881	4.63001	3.06616e-08	1.07658e-06
AC073578.1|ENSG00000256209|lincRNA	4.6558	1.91682	3.16335e-08	1.09884e-06
LINC02419|ENSG00000256906|lincRNA	2.85526	2.99843	3.17544e-08	1.09913e-06
AC007349.2|ENSG00000230831|antisense	2.07456	0.837375	3.18762e-08	1.09945e-06
LINC01792|ENSG00000237166|lincRNA	2.73337	2.94236	3.23413e-08	1.1108e-06
KIAA0087|ENSG00000122548|lincRNA	4.78282	2.94485	3.24331e-08	1.1108e-06
LIN28B-AS1|ENSG00000203809|lincRNA	3.59953	5.01799	3.25908e-08	1.1123e-06
AC092378.2|ENSG00000261638|lincRNA	-2.19621	5.13126	3.33155e-08	1.13308e-06
AP003170.4|ENSG00000256603|antisense	2.40072	3.18408	3.37487e-08	1.14382e-06
AC068858.1|ENSG00000254654|lincRNA	2.39037	5.0612	3.56995e-08	1.20278e-06
AC131391.1|ENSG00000260601|sense_intronic	5.76617	2.00263	3.57347e-08	1.20278e-06
RNF144A-AS1|ENSG00000228203|processed_transcript	2.55116	4.32686	3.58838e-08	1.20365e-06
AP005059.1|ENSG00000264000|antisense	4.57237	4.36968	3.68683e-08	1.22823e-06
AC003991.1|ENSG00000228113|antisense	3.79776	6.50123	3.71186e-08	1.23236e-06
MIR548XHG|ENSG00000224141|lincRNA	7.24807	3.41324	3.83721e-08	1.26966e-06
AL109910.2|ENSG00000271820|lincRNA	2.71371	2.59583	3.8509e-08	1.26989e-06
ZNF385D-AS1|ENSG00000225542|antisense	6.02039	1.83368	4.03972e-08	1.31879e-06
LINC02293|ENSG00000257185|lincRNA	5.14389	1.19643	4.20625e-08	1.36857e-06
ARHGEF3-AS1|ENSG00000240198|antisense	3.49261	4.34309	4.22761e-08	1.37095e-06
AC139099.2|ENSG00000262898|lincRNA	-2.40244	7.83461	4.24677e-08	1.37261e-06
LINC01151|ENSG00000253819|lincRNA	2.20461	6.18862	4.28573e-08	1.3773e-06
AC010719.1|ENSG00000270933|lincRNA	3.01502	5.64944	4.28951e-08	1.3773e-06
AC068020.1|ENSG00000268955|lincRNA	3.50497	2.65615	4.40657e-08	1.41025e-06
LINC01993|ENSG00000204277|lincRNA	2.17007	2.87753	4.7741e-08	1.52288e-06
LINC01297|ENSG00000274827|lincRNA	3.37281	2.13312	5.01602e-08	1.59483e-06
AF240627.1|ENSG00000230233|lincRNA	3.38983	2.04017	5.03688e-08	1.59626e-06
AL355974.1|ENSG00000274331|lincRNA	4.1046	4.26033	5.07933e-08	1.60451e-06
LINC00276|ENSG00000230448|lincRNA	3.84482	6.28986	5.18151e-08	1.63151e-06
AP000526.1|ENSG00000271127|sense_intronic	2.5395	1.02419	5.28857e-08	1.65986e-06
AL590666.2|ENSG00000229953|antisense	3.65638	6.17831	5.48156e-08	1.71492e-06
AC092598.1|ENSG00000223523|sense_overlapping	4.15486	2.77891	5.5526e-08	1.73159e-06
AL365204.2|ENSG00000237414|lincRNA	2.40976	1.63645	5.62841e-08	1.74965e-06
KCNMB2-AS1|ENSG00000237978|antisense	4.48191	5.29775	5.69487e-08	1.75507e-06
AL117378.1|ENSG00000236673|lincRNA	3.46532	4.86807	5.69846e-08	1.75507e-06
LINC00879|ENSG00000239589|lincRNA	6.59585	3.09646	5.6998e-08	1.75507e-06
AC106037.2|ENSG00000265656|antisense	2.50291	2.29633	5.73078e-08	1.75906e-06
AL133325.3|ENSG00000278041|lincRNA	5.06554	1.14201	5.75999e-08	1.76027e-06
AC090358.1|ENSG00000265217|lincRNA	5.24911	1.8609	5.77079e-08	1.76027e-06
AC062015.1|ENSG00000235070|lincRNA	7.38389	3.19502	5.96491e-08	1.81382e-06
AC008060.4|ENSG00000260426|sense_overlapping	5.95416	2.44653	6.0199e-08	1.82485e-06
AL589182.1|ENSG00000258314|lincRNA	5.7034	1.58503	6.11912e-08	1.84919e-06
AC093732.2|ENSG00000272814|antisense	2.21475	1.45988	6.18327e-08	1.8628e-06
AC084346.1|ENSG00000254057|lincRNA	3.32094	5.3054	6.3467e-08	1.90616e-06
LINC02445|ENSG00000257750|lincRNA	3.17622	0.757379	6.43196e-08	1.92584e-06
HOXC-AS2|ENSG00000250133|processed_transcript	3.02706	2.65018	6.60353e-08	1.97111e-06
LINC01956|ENSG00000258910|lincRNA	4.51852	3.35095	6.62353e-08	1.97111e-06
LINC01901|ENSG00000267413|lincRNA	5.08953	1.76094	6.72923e-08	1.99648e-06
AL032819.1|ENSG00000260132|antisense	3.41556	6.57192	6.86747e-08	2.03131e-06
LINC00942|ENSG00000249628|lincRNA	7.53281	7.07707	7.01178e-08	2.06151e-06
Z99756.1|ENSG00000203527|antisense	3.0841	2.59383	7.03421e-08	2.06189e-06
C2orf48|ENSG00000163009|lincRNA	2.57681	3.49825	7.07774e-08	2.06844e-06
AC005329.3|ENSG00000280486|antisense	2.32015	0.990838	7.15956e-08	2.08294e-06
LINC01667|ENSG00000280081|lincRNA	7.40105	5.77382	7.17003e-08	2.08294e-06
AL359258.1|ENSG00000238122|lincRNA	4.5376	1.45975	7.28805e-08	2.11094e-06
AC010280.1|ENSG00000248359|lincRNA	-2.50266	1.88157	7.48404e-08	2.16129e-06
AC092675.1|ENSG00000222000|antisense	5.66599	1.59697	7.58432e-08	2.18379e-06
B3GALT5-AS1|ENSG00000184809|antisense	-2.22192	2.28562	7.78624e-08	2.23534e-06
LINC01608|ENSG00000253877|lincRNA	7.25264	4.48012	7.8347e-08	2.24077e-06
LINC00598|ENSG00000215483|lincRNA	2.0902	4.22575	7.85108e-08	2.24077e-06
AL359313.1|ENSG00000236366|lincRNA	6.56343	3.2047	8.26682e-08	2.33891e-06
AL445209.1|ENSG00000271776|antisense	3.73494	1.66625	8.45484e-08	2.38386e-06
NPSR1-AS1|ENSG00000197085|processed_transcript	2.57011	5.7512	8.99818e-08	2.52388e-06
LINC01445|ENSG00000231427|lincRNA	3.90489	3.39433	9.24174e-08	2.57739e-06
AL139237.1|ENSG00000227029|lincRNA	-2.03771	4.39469	9.50549e-08	2.64339e-06
LINC01386|ENSG00000251324|antisense	4.50978	5.02942	9.64384e-08	2.67425e-06
AC090241.3|ENSG00000274776|lincRNA	2.62263	2.42687	9.68085e-08	2.6769e-06
AC090680.2|ENSG00000258338|lincRNA	3.43811	1.18806	9.78334e-08	2.6976e-06
AC105390.1|ENSG00000250192|lincRNA	2.88205	1.35581	9.89649e-08	2.71257e-06
LINC01257|ENSG00000204603|lincRNA	2.56066	1.95923	9.98846e-08	2.71529e-06
AL360093.1|ENSG00000223842|lincRNA	2.09918	2.49955	1.00144e-07	2.71529e-06
AL136141.1|ENSG00000270755|lincRNA	2.10301	5.33923	1.0225e-07	2.7647e-06
AC008655.1|ENSG00000267815|antisense	2.49377	1.85212	1.02875e-07	2.77393e-06
LINC01697|ENSG00000232079|processed_transcript	6.72961	4.26824	1.03781e-07	2.79065e-06
AC125608.1|ENSG00000223812|lincRNA	7.02985	2.68952	1.05483e-07	2.82088e-06
LINC02058|ENSG00000248528|lincRNA	2.47558	1.60737	1.06063e-07	2.82863e-06
DSCR4-IT1|ENSG00000223608|sense_intronic	5.91274	1.74361	1.06414e-07	2.83025e-06
AL954650.1|ENSG00000228215|lincRNA	6.33534	2.08487	1.07322e-07	2.84666e-06
AC007128.1|ENSG00000229970|antisense	5.52369	1.96695	1.07902e-07	2.85428e-06
ANKRD62P1-PARP4P3|ENSG00000189295|processed_transcript	3.62506	5.04718	1.15478e-07	3.04643e-06
LINC01943|ENSG00000280721|lincRNA	2.04154	4.80224	1.18293e-07	3.11228e-06
AC092634.5|ENSG00000236299|lincRNA	3.32819	5.41327	1.18632e-07	3.11282e-06
AL079303.2|ENSG00000258661|antisense	3.45673	4.99531	1.23655e-07	3.23592e-06
AL162726.4|ENSG00000232749|lincRNA	2.29906	1.24637	1.27524e-07	3.32825e-06
AC008991.2|ENSG00000267683|lincRNA	5.61631	1.51578	1.28551e-07	3.33721e-06
AC005722.2|ENSG00000262681|lincRNA	3.30944	3.32314	1.2896e-07	3.33894e-06
AL139023.1|ENSG00000257869|lincRNA	6.19259	2.85239	1.29816e-07	3.3522e-06
AL138799.4|ENSG00000234953|antisense	3.06879	3.77531	1.34891e-07	3.47407e-06
AL591686.1|ENSG00000224525|antisense	6.98598	3.57288	1.35382e-07	3.47754e-06
AL353658.2|ENSG00000280936|antisense	3.1982	0.51268	1.3707e-07	3.50954e-06
AC010503.1|ENSG00000268191|antisense	2.80367	2.14257	1.37347e-07	3.50954e-06
AC090921.1|ENSG00000214803|lincRNA	4.44886	4.77815	1.42521e-07	3.63224e-06
LINC01518|ENSG00000233515|lincRNA	5.86628	1.88861	1.47398e-07	3.74676e-06
FP325330.3|ENSG00000279712|lincRNA	3.3709	1.16662	1.48725e-07	3.77066e-06
KC877982.1|ENSG00000269993|lincRNA	6.57568	4.71588	1.49137e-07	3.77131e-06
STAM-AS1|ENSG00000260589|antisense	2.65961	2.81427	1.57086e-07	3.92152e-06
AC018946.1|ENSG00000259177|antisense	3.49	4.40636	1.60433e-07	3.99487e-06
AL160408.4|ENSG00000241475|lincRNA	5.02189	1.73443	1.6651e-07	4.11469e-06
DDX11-AS1|ENSG00000245614|antisense	2.71488	4.02244	1.69482e-07	4.16745e-06
AC074135.1|ENSG00000267886|lincRNA	3.52433	2.23633	1.69499e-07	4.16745e-06
AC104984.5|ENSG00000266919|sense_intronic	3.49715	5.10073	1.81481e-07	4.41754e-06
LINC00226|ENSG00000276210|lincRNA	3.74643	0.843518	1.84018e-07	4.45938e-06
AL160413.1|ENSG00000275923|lincRNA	3.64062	5.76117	1.84113e-07	4.45938e-06
LINC00221|ENSG00000270816|lincRNA	7.3054	6.69531	1.90403e-07	4.60031e-06
AL354714.1|ENSG00000198358|antisense	2.94447	1.55622	1.91961e-07	4.61819e-06
AC109588.1|ENSG00000250038|lincRNA	6.6754	3.34194	1.9471e-07	4.6697e-06
AC245128.3|ENSG00000268734|lincRNA	-2.27243	2.45995	1.95473e-07	4.6765e-06
AL080284.1|ENSG00000224605|lincRNA	5.52323	2.30142	1.9683e-07	4.69745e-06
LINC00485|ENSG00000258169|lincRNA	2.64687	1.45601	1.99417e-07	4.74759e-06
ADGRD1-AS1|ENSG00000256151|lincRNA	7.21136	3.38489	2.00177e-07	4.75408e-06
LINC02082|ENSG00000242268|lincRNA	5.53984	1.94372	2.04284e-07	4.83984e-06
AP005229.1|ENSG00000267051|lincRNA	4.13875	1.403	2.0949e-07	4.93921e-06
AC097521.2|ENSG00000250590|lincRNA	5.88394	2.11376	2.1428e-07	5.03997e-06
AC011294.1|ENSG00000233539|lincRNA	4.84269	5.06348	2.15002e-07	5.04481e-06
LINC01189|ENSG00000232827|lincRNA	4.86834	2.61671	2.1553e-07	5.04505e-06
AL137026.2|ENSG00000237590|lincRNA	5.48822	2.14907	2.20986e-07	5.1604e-06
AC002550.1|ENSG00000261312|antisense	3.39397	2.00498	2.36423e-07	5.48153e-06
AC006237.1|ENSG00000271392|sense_intronic	3.15121	5.4183	2.3817e-07	5.50894e-06
LINC00392|ENSG00000228295|lincRNA	4.48468	0.936135	2.43615e-07	5.60831e-06
AC119424.1|ENSG00000243384|antisense	-2.08865	3.72599	2.45718e-07	5.64341e-06
LINC01762|ENSG00000233154|lincRNA	2.44483	3.15091	2.48879e-07	5.70261e-06
LINC00906|ENSG00000267339|lincRNA	5.74435	2.55688	2.50832e-07	5.73389e-06
HOXC-AS1|ENSG00000250451|antisense	3.11377	2.46267	2.56571e-07	5.83774e-06
AC025272.1|ENSG00000260937|lincRNA	5.1239	2.62959	2.61952e-07	5.9325e-06
FLJ36000|ENSG00000276399|lincRNA	5.24105	1.25161	2.65437e-07	5.9972e-06
PTGES2-AS1|ENSG00000232850|lincRNA	4.07869	2.90551	2.66037e-07	5.9972e-06
AC013733.2|ENSG00000234595|antisense	3.84156	6.71892	2.71296e-07	6.10165e-06
AC018554.1|ENSG00000261436|lincRNA	3.05406	2.62132	2.77896e-07	6.23572e-06
AC092954.1|ENSG00000272797|lincRNA	2.47928	1.05631	2.79458e-07	6.2564e-06
AC087392.1|ENSG00000262003|antisense	-2.56682	5.20612	2.85784e-07	6.36166e-06
AC126175.1|ENSG00000277738|lincRNA	5.13659	1.94346	2.90098e-07	6.43557e-06
PART1|ENSG00000152931|lincRNA	7.01283	5.64446	2.93596e-07	6.4984e-06
LINC02050|ENSG00000242781|lincRNA	5.01238	1.10299	2.96197e-07	6.54112e-06
AC015712.7|ENSG00000278456|antisense	5.62371	3.86044	3.02231e-07	6.62939e-06
AC113346.2|ENSG00000251670|lincRNA	4.7044	2.8497	3.12048e-07	6.82835e-06
TDRG1|ENSG00000204091|antisense	5.71086	1.76151	3.134e-07	6.82835e-06
AL512506.1|ENSG00000274001|sense_intronic	3.17588	0.717663	3.17755e-07	6.89245e-06
AC099508.2|ENSG00000261058|lincRNA	-2.51399	4.22506	3.19765e-07	6.92068e-06
AC116914.1|ENSG00000262358|antisense	3.20249	1.32942	3.2277e-07	6.97026e-06
NOVA1-AS1|ENSG00000257842|antisense	6.1648	3.29888	3.23986e-07	6.98107e-06
CDKN2B-AS1|ENSG00000240498|antisense	4.02584	4.81713	3.28671e-07	7.06643e-06
KCNMA1-AS2|ENSG00000225497|antisense	3.13308	0.833321	3.39602e-07	7.26942e-06
AC099542.2|ENSG00000242145|lincRNA	5.79707	2.48861	3.4231e-07	7.31134e-06
AC074135.2|ENSG00000269543|lincRNA	4.0381	0.670046	3.44461e-07	7.34123e-06
AL713965.1|ENSG00000227687|antisense	3.56922	1.32971	3.50296e-07	7.44932e-06
DEPDC1-AS1|ENSG00000234264|antisense	4.31802	1.04647	3.5512e-07	7.5355e-06
MIR663AHG|ENSG00000227195|processed_transcript	6.93006	3.91618	3.63413e-07	7.69474e-06
LINC01085|ENSG00000248698|lincRNA	5.31484	2.21243	3.6502e-07	7.71203e-06
AC139769.2|ENSG00000267924|lincRNA	4.63861	3.59322	3.66062e-07	7.71734e-06
AL358394.1|ENSG00000227683|lincRNA	5.63414	1.68242	3.67175e-07	7.72412e-06
AL157778.1|ENSG00000281566|lincRNA	6.05563	2.72947	3.72313e-07	7.81537e-06
AP003086.2|ENSG00000254420|antisense	2.46679	3.27544	3.74962e-07	7.85409e-06
AL117338.1|ENSG00000223470|lincRNA	3.33634	1.06057	3.95045e-07	8.25703e-06
AC060234.2|ENSG00000233665|processed_transcript	2.02969	4.33567	4.09466e-07	8.50383e-06
LINC02466|ENSG00000246876|lincRNA	2.03189	2.24285	4.12479e-07	8.5482e-06
AC010401.2|ENSG00000262732|antisense	2.06043	2.1254	4.15599e-07	8.59366e-06
LINC01148|ENSG00000258804|lincRNA	3.18545	2.51675	4.22913e-07	8.69292e-06
LINC00494|ENSG00000235621|lincRNA	2.25587	5.12878	4.24503e-07	8.69292e-06
LINC00383|ENSG00000237534|lincRNA	5.78013	2.07318	4.24805e-07	8.69292e-06
AC083864.2|ENSG00000232930|lincRNA	2.34865	2.32271	4.26517e-07	8.70243e-06
LINC01929|ENSG00000267013|lincRNA	2.85712	3.24248	4.27371e-07	8.70243e-06
AC010406.1|ENSG00000250567|lincRNA	2.20655	0.486479	4.28937e-07	8.70243e-06
AC005670.1|ENSG00000261886|lincRNA	2.51623	1.53728	4.29417e-07	8.70243e-06
LINC01863|ENSG00000253959|lincRNA	-2.4606	2.27181	4.29727e-07	8.70243e-06
MNX1-AS1|ENSG00000243479|lincRNA	6.54176	3.98977	4.32648e-07	8.72536e-06
WARS2-IT1|ENSG00000224238|antisense	-2.02134	2.06601	4.33757e-07	8.72969e-06
AC023090.1|ENSG00000267015|antisense	5.58179	3.49067	4.43436e-07	8.87107e-06
LINC01022|ENSG00000232715|antisense	4.79276	1.30321	4.43508e-07	8.87107e-06
LINC02119|ENSG00000248461|lincRNA	7.43719	4.66633	4.44773e-07	8.87819e-06
LINC01477|ENSG00000261715|lincRNA	3.57042	0.948562	4.48197e-07	8.92826e-06
MIR2052HG|ENSG00000254349|lincRNA	2.56001	2.92789	4.57124e-07	9.08755e-06
AL353803.1|ENSG00000226355|lincRNA	3.33664	0.823416	4.63137e-07	9.18837e-06
AC023669.2|ENSG00000237760|lincRNA	3.09327	3.54314	4.73339e-07	9.29911e-06
TFAP2A-AS1|ENSG00000229950|antisense	4.55443	4.08349	4.73482e-07	9.29911e-06
AC023302.1|ENSG00000271983|lincRNA	4.00301	1.18266	4.74767e-07	9.30562e-06
AC008103.1|ENSG00000279987|sense_intronic	3.30409	5.1639	4.92355e-07	9.57347e-06
AC091230.1|ENSG00000261606|processed_transcript	5.07519	1.14026	4.97526e-07	9.65478e-06
AC025016.1|ENSG00000255257|lincRNA	2.13944	3.63459	4.99449e-07	9.67286e-06
LINC02371|ENSG00000274659|lincRNA	3.1304	6.51931	5.14837e-07	9.95113e-06
AC122710.1|ENSG00000250060|lincRNA	6.08767	2.7362	5.21923e-07	1.00682e-05
AC009902.3|ENSG00000272425|lincRNA	2.83245	1.55834	5.32403e-07	1.02294e-05
LINC02153|ENSG00000253199|lincRNA	-2.41921	1.39297	5.33374e-07	1.02294e-05
LINC01511|ENSG00000250584|lincRNA	6.30823	2.54339	5.33428e-07	1.02294e-05
AC006065.4|ENSG00000256732|lincRNA	6.5706	3.8736	5.37344e-07	1.02844e-05
AC021491.2|ENSG00000250286|processed_transcript	3.94419	1.42805	5.50231e-07	1.05104e-05
AC233280.1|ENSG00000229178|lincRNA	2.40782	2.69843	5.51503e-07	1.05141e-05
AC105924.1|ENSG00000249877|lincRNA	2.22636	0.890437	5.56176e-07	1.05825e-05
AC082651.4|ENSG00000244260|lincRNA	3.12319	4.68056	5.58124e-07	1.05989e-05
AC016590.1|ENSG00000267605|lincRNA	2.61947	1.86944	5.61178e-07	1.06362e-05
AC107973.1|ENSG00000254734|lincRNA	5.01767	1.3975	5.62301e-07	1.06369e-05
LINC00645|ENSG00000258548|lincRNA	5.06768	1.13999	5.66252e-07	1.06907e-05
AC005220.1|ENSG00000236352|antisense	3.28051	2.89415	5.67337e-07	1.06907e-05
LINC02208|ENSG00000250891|lincRNA	2.70883	0.700383	5.68531e-07	1.06926e-05
AC113391.1|ENSG00000248484|lincRNA	5.33159	2.75595	5.704e-07	1.07071e-05
AC004870.2|ENSG00000223829|processed_transcript	6.43941	2.63906	5.96942e-07	1.11624e-05
AC124276.1|ENSG00000254486|lincRNA	2.26128	5.6153	6.09142e-07	1.13687e-05
LINC00160|ENSG00000230978|lincRNA	2.39824	1.60332	6.13586e-07	1.14298e-05
AP003062.1|ENSG00000255327|lincRNA	6.12417	1.91048	6.1603e-07	1.14535e-05
AC010595.1|ENSG00000250874|lincRNA	5.88891	2.56979	6.19872e-07	1.1503e-05
LINC00458|ENSG00000234787|lincRNA	3.43441	1.37543	6.25525e-07	1.15859e-05
LINC01416|ENSG00000260930|lincRNA	2.70732	0.64162	6.32656e-07	1.16958e-05
AC091153.4|ENSG00000261898|antisense	2.4997	6.8933	6.44781e-07	1.18749e-05
AL513164.1|ENSG00000224658|antisense	3.2731	0.208823	6.64517e-07	1.21924e-05
AL139042.1|ENSG00000234426|lincRNA	4.91668	2.01501	6.66124e-07	1.21989e-05
AL136129.1|ENSG00000261039|lincRNA	2.1265	2.71103	6.74119e-07	1.23051e-05
LINC02267|ENSG00000248510|lincRNA	5.21685	2.55628	6.757e-07	1.23051e-05
AC083967.1|ENSG00000254337|lincRNA	3.39789	1.61539	6.79131e-07	1.23445e-05
LINC02413|ENSG00000257345|lincRNA	5.55374	3.76625	6.82115e-07	1.23757e-05
AL117355.1|ENSG00000257636|antisense	3.66696	3.04011	6.877e-07	1.24539e-05
AL133370.1|ENSG00000258837|antisense	5.33575	2.72518	7.12068e-07	1.28713e-05
AC104365.1|ENSG00000267476|antisense	3.26895	3.57714	7.16006e-07	1.29011e-05
AL136379.1|ENSG00000276255|lincRNA	2.49595	1.04963	7.29176e-07	1.30836e-05
AL358613.2|ENSG00000279607|lincRNA	-2.27232	1.3649	7.47427e-07	1.33865e-05
AC008543.4|ENSG00000267089|lincRNA	2.61639	4.25176	7.49724e-07	1.33903e-05
AC009102.1|ENSG00000260198|sense_intronic	-2.43634	9.88971	7.50381e-07	1.33903e-05
AC007128.2|ENSG00000272328|lincRNA	2.234	3.64711	7.55495e-07	1.34569e-05
AC073323.1|ENSG00000232524|antisense	5.58984	1.64494	7.77654e-07	1.38264e-05
AL512652.1|ENSG00000275485|sense_intronic	3.55136	1.61558	7.93628e-07	1.40486e-05
AL365181.2|ENSG00000272068|lincRNA	4.87994	6.71013	7.94132e-07	1.40486e-05
LINC00850|ENSG00000280752|lincRNA	3.3792	2.36411	7.94469e-07	1.40486e-05
AC016877.3|ENSG00000271930|lincRNA	5.08119	1.84271	7.98904e-07	1.41015e-05
AL133467.4|ENSG00000270038|lincRNA	2.10585	3.77243	8.11083e-07	1.42906e-05
AC068870.1|ENSG00000260619|lincRNA	2.12762	2.85167	8.13235e-07	1.43027e-05
LINC01117|ENSG00000224577|lincRNA	4.26506	1.74664	8.186e-07	1.43711e-05
AC024610.2|ENSG00000279668|lincRNA	-2.11642	2.98888	8.27121e-07	1.44947e-05
AC005323.1|ENSG00000214970|antisense	3.34543	0.356023	8.48988e-07	1.47982e-05
LINC02008|ENSG00000239440|lincRNA	3.28267	0.833587	8.55363e-07	1.48562e-05
AL109615.2|ENSG00000231881|lincRNA	4.37436	1.78606	8.80345e-07	1.52359e-05
PLCE1-AS1|ENSG00000268894|antisense	4.50456	2.29157	8.87184e-07	1.53271e-05
LINC01524|ENSG00000234948|lincRNA	4.94383	2.0045	8.90809e-07	1.53625e-05
AC023824.6|ENSG00000261800|lincRNA	5.41479	1.36913	8.95219e-07	1.54113e-05
AC079414.1|ENSG00000261540|antisense	3.86994	0.662919	9.02757e-07	1.55138e-05
AC005722.3|ENSG00000264785|antisense	5.94516	2.24304	9.10823e-07	1.56038e-05
AC002384.1|ENSG00000228742|lincRNA	5.74775	2.75731	9.11192e-07	1.56038e-05
AP003472.2|ENSG00000253842|lincRNA	2.25313	0.344674	9.46877e-07	1.61582e-05
AL160290.2|ENSG00000230131|lincRNA	4.46673	1.04481	9.65548e-07	1.6448e-05
LINC02238|ENSG00000223479|lincRNA	3.91102	0.470727	9.98711e-07	1.69243e-05
AC003092.1|ENSG00000236453|lincRNA	3.81899	1.02413	1.00771e-06	1.70472e-05
AC011503.1|ENSG00000269289|antisense	4.95842	4.08159	1.01175e-06	1.7086e-05
LINC01267|ENSG00000251576|lincRNA	2.73276	0.770167	1.06204e-06	1.78734e-05
AC100823.1|ENSG00000237061|sense_intronic	2.06034	1.54964	1.07149e-06	1.79705e-05
AL133387.3|ENSG00000230967|lincRNA	2.82308	3.40942	1.08525e-06	1.81079e-05
AL356481.2|ENSG00000280474|sense_intronic	3.17272	2.23467	1.0943e-06	1.82277e-05
LINC01632|ENSG00000277199|lincRNA	3.47699	2.30619	1.13249e-06	1.87998e-05
AC008080.2|ENSG00000227481|antisense	2.92821	4.86569	1.13762e-06	1.88527e-05
AC004877.1|ENSG00000273419|antisense	3.08971	3.59581	1.14733e-06	1.89815e-05
AL512604.2|ENSG00000233242|antisense	2.15314	1.79432	1.1646e-06	1.91965e-05
ARHGEF7-AS1|ENSG00000227352|antisense	3.97712	2.1187	1.18865e-06	1.95327e-05
AC122710.3|ENSG00000272071|lincRNA	3.16281	2.18877	1.22542e-06	2.0103e-05
AC109309.1|ENSG00000224513|antisense	2.13621	1.24862	1.22913e-06	2.01301e-05
AC112721.2|ENSG00000222032|lincRNA	2.20852	0.774514	1.23297e-06	2.01592e-05
AL122019.1|ENSG00000227579|lincRNA	-2.08578	4.08163	1.24305e-06	2.029e-05
LINC02473|ENSG00000261121|lincRNA	4.25839	1.02359	1.25197e-06	2.04015e-05
AL031779.1|ENSG00000227602|sense_intronic	2.04839	0.597993	1.26077e-06	2.05106e-05
AC105999.2|ENSG00000253802|lincRNA	5.79765	1.66712	1.26588e-06	2.05595e-05
AC092957.1|ENSG00000243620|antisense	2.28991	2.95559	1.2752e-06	2.06764e-05
LINC02055|ENSG00000254101|lincRNA	3.24931	4.97549	1.27969e-06	2.07149e-05
LINC02275|ENSG00000248319|lincRNA	-2.27934	4.25071	1.30059e-06	2.09836e-05
AL390816.2|ENSG00000258903|lincRNA	3.70838	4.89247	1.30456e-06	2.10128e-05
AP000525.1|ENSG00000272872|sense_intronic	2.56918	2.66286	1.31319e-06	2.10824e-05
LINC01090|ENSG00000231689|lincRNA	2.52664	0.886375	1.33256e-06	2.13581e-05
AC246817.1|ENSG00000253853|lincRNA	3.43885	4.76401	1.34859e-06	2.15797e-05
LINC01338|ENSG00000281327|lincRNA	3.44585	1.14137	1.35175e-06	2.15948e-05
AC008443.3|ENSG00000248103|lincRNA	4.72046	1.33581	1.35626e-06	2.16314e-05
AC104791.1|ENSG00000251687|antisense	3.69963	1.09464	1.37253e-06	2.18553e-05
AL133367.1|ENSG00000260285|antisense	2.28937	4.99448	1.38742e-06	2.20564e-05
AC103808.3|ENSG00000265717|lincRNA	4.85358	1.32923	1.39225e-06	2.20972e-05
AC090049.1|ENSG00000257863|lincRNA	2.54624	0.541709	1.49405e-06	2.35978e-05
AC032011.1|ENSG00000274340|lincRNA	2.48162	2.79129	1.53961e-06	2.42389e-05
AC113383.1|ENSG00000250320|antisense	4.29569	1.68218	1.55845e-06	2.4496e-05
GACAT3|ENSG00000236289|lincRNA	4.10788	1.04199	1.57801e-06	2.47637e-05
AL139130.1|ENSG00000237390|lincRNA	3.8183	2.43602	1.58239e-06	2.47925e-05
AC234772.2|ENSG00000231566|lincRNA	4.2029	1.14004	1.58747e-06	2.48322e-05
AC006455.8|ENSG00000244550|processed_transcript	3.11841	0.938558	1.60051e-06	2.49803e-05
LINC01235|ENSG00000270547|lincRNA	3.18443	4.37463	1.60206e-06	2.49803e-05
AC099786.2|ENSG00000224149|antisense	5.74413	1.58953	1.60487e-06	2.49843e-05
AC008875.1|ENSG00000271788|lincRNA	3.74944	2.03086	1.63918e-06	2.54778e-05
AC079298.3|ENSG00000280241|antisense	3.0846	0.601056	1.64841e-06	2.55805e-05
AL033384.2|ENSG00000271218|antisense	3.25744	1.44032	1.65382e-06	2.56237e-05
LINC02149|ENSG00000248486|lincRNA	3.295	3.85679	1.67309e-06	2.58811e-05
AC016994.1|ENSG00000227294|antisense	2.31711	2.18655	1.69687e-06	2.62075e-05
AL139275.2|ENSG00000227131|lincRNA	3.8526	1.5009	1.75872e-06	2.71198e-05
AL357033.1|ENSG00000167046|antisense	2.09657	2.95788	1.77962e-06	2.73557e-05
PPFIA2-AS1|ENSG00000257467|lincRNA	2.6175	4.17635	1.88515e-06	2.88869e-05
AC106017.2|ENSG00000281856|lincRNA	3.57155	0.5927	1.91118e-06	2.92398e-05
AC073389.2|ENSG00000271848|antisense	2.64218	2.84444	1.92228e-06	2.93637e-05
ENOX1-AS1|ENSG00000233821|lincRNA	3.07128	1.18068	1.93915e-06	2.94787e-05
AC026741.1|ENSG00000272103|lincRNA	2.99286	2.30965	1.94003e-06	2.94787e-05
AC027458.1|ENSG00000260457|lincRNA	2.63816	3.49243	1.94491e-06	2.94787e-05
LINC01748|ENSG00000226476|lincRNA	5.06434	3.67351	1.97774e-06	2.99297e-05
AC104809.1|ENSG00000223991|antisense	-2.86688	7.53979	2.01313e-06	3.03712e-05
SPATA3-AS1|ENSG00000238062|lincRNA	3.19371	2.52428	2.04453e-06	3.07973e-05
AC092115.3|ENSG00000262136|antisense	4.54352	2.57489	2.07729e-06	3.12425e-05
AC018692.1|ENSG00000279321|lincRNA	2.27938	1.66095	2.08792e-06	3.13542e-05
AC008556.1|ENSG00000277013|lincRNA	-2.06098	4.59644	2.14107e-06	3.21029e-05
TSPEAR-AS2|ENSG00000182912|antisense	2.93422	6.48819	2.16253e-06	3.23749e-05
U47924.3|ENSG00000275703|lincRNA	2.24403	2.291	2.25897e-06	3.37153e-05
AC080129.2|ENSG00000232874|antisense	2.09478	3.62951	2.26736e-06	3.37888e-05
AL590079.1|ENSG00000258913|lincRNA	-2.2418	2.84376	2.28702e-06	3.39781e-05
AL138831.1|ENSG00000230648|antisense	2.63181	1.53682	2.31345e-06	3.43185e-05
SRGAP3-AS2|ENSG00000228723|antisense	3.91573	1.38339	2.31749e-06	3.43263e-05
AC010333.1|ENSG00000259876|antisense	4.6771	2.41073	2.37064e-06	3.50604e-05
AC010624.2|ENSG00000267890|lincRNA	5.37111	2.4819	2.46187e-06	3.62449e-05
AC010307.2|ENSG00000248245|antisense	2.96163	1.23413	2.4787e-06	3.64376e-05
AL591686.2|ENSG00000272865|antisense	4.40752	1.74912	2.52238e-06	3.69129e-05
AC079203.2|ENSG00000259468|antisense	2.24007	1.80626	2.53995e-06	3.71145e-05
AL590483.1|ENSG00000229960|lincRNA	2.06115	1.01094	2.545e-06	3.71326e-05
AC084756.1|ENSG00000259684|antisense	2.73217	4.18129	2.57936e-06	3.75217e-05
AL008733.1|ENSG00000226286|antisense	2.84222	1.09609	2.6081e-06	3.78272e-05
AC087318.1|ENSG00000256714|lincRNA	4.67733	1.44172	2.62741e-06	3.79421e-05
AL606760.3|ENSG00000259818|antisense	2.68753	5.85464	2.62769e-06	3.79421e-05
AC114401.1|ENSG00000241884|lincRNA	4.66369	2.54046	2.64465e-06	3.81306e-05
AC079466.1|ENSG00000266976|lincRNA	6.10952	9.23103	2.64979e-06	3.81484e-05
AC009271.1|ENSG00000267327|lincRNA	4.84393	2.04365	2.65417e-06	3.81552e-05
AC013553.3|ENSG00000277351|antisense	3.19812	1.58602	2.68445e-06	3.85337e-05
LINC01568|ENSG00000258779|lincRNA	5.72734	1.60438	2.69291e-06	3.85417e-05
AC055878.1|ENSG00000255357|lincRNA	-2.44128	7.84736	2.77514e-06	3.95489e-05
IGFL2-AS1|ENSG00000268621|lincRNA	4.90364	3.27695	2.77948e-06	3.95489e-05
AP005057.1|ENSG00000264080|lincRNA	4.39276	3.10441	2.87314e-06	4.07627e-05
PICSAR|ENSG00000275874|lincRNA	5.10509	2.97015	2.94403e-06	4.15888e-05
AC006206.2|ENSG00000256417|lincRNA	2.88274	3.15834	2.94587e-06	4.15888e-05
MRPL23-AS1|ENSG00000226416|antisense	2.81467	4.04806	2.94841e-06	4.15888e-05
AC027343.2|ENSG00000249865|antisense	3.82032	1.74278	2.96351e-06	4.17363e-05
AL355102.5|ENSG00000259036|antisense	4.21649	2.84017	2.96742e-06	4.17363e-05
AC007402.1|ENSG00000231918|lincRNA	5.22775	1.76854	2.97899e-06	4.18292e-05
AL078590.1|ENSG00000229722|lincRNA	2.59258	1.60768	3.01356e-06	4.22028e-05
LINC00944|ENSG00000256128|lincRNA	3.38534	4.94464	3.02263e-06	4.22691e-05
LINC01886|ENSG00000224568|lincRNA	2.65319	2.44519	3.0469e-06	4.24869e-05
AC009646.2|ENSG00000254687|antisense	6.32564	3.92985	3.14813e-06	4.37734e-05
AL445228.2|ENSG00000271387|lincRNA	3.42809	2.41183	3.15586e-06	4.38185e-05
LINC02307|ENSG00000258969|lincRNA	2.48737	0.941858	3.16689e-06	4.39092e-05
AC092447.8|ENSG00000261275|lincRNA	3.17012	1.83891	3.17235e-06	4.39224e-05
PVT1|ENSG00000249859|lincRNA	2.39447	7.46363	3.2199e-06	4.45177e-05
TLX1NB|ENSG00000236311|processed_transcript	4.11137	1.29759	3.22564e-06	4.45257e-05
AC023421.1|ENSG00000266968|sense_intronic	2.8295	6.20528	3.22961e-06	4.45257e-05
AC022903.1|ENSG00000264622|lincRNA	3.97099	2.85739	3.24295e-06	4.46466e-05
AP001007.2|ENSG00000255475|lincRNA	3.73726	1.26859	3.28348e-06	4.51409e-05
WT1-AS|ENSG00000183242|antisense	2.47452	4.14015	3.28966e-06	4.51541e-05
AL596087.2|ENSG00000230898|sense_intronic	3.51321	1.19226	3.30868e-06	4.5296e-05
AP001599.1|ENSG00000223563|antisense	3.96969	0.817496	3.38659e-06	4.62976e-05
AC068481.1|ENSG00000223884|antisense	3.17845	0.950404	3.42206e-06	4.67171e-05
FER1L6-AS2|ENSG00000253868|antisense	5.06035	1.49357	3.48942e-06	4.74377e-05
AL161729.4|ENSG00000271659|antisense	3.00798	1.63985	3.50484e-06	4.7581e-05
AC089983.1|ENSG00000257732|antisense	4.75222	1.27572	3.52008e-06	4.77215e-05
AC126696.3|ENSG00000260498|lincRNA	3.36059	1.07486	3.52626e-06	4.7739e-05
AC007277.1|ENSG00000213981|antisense	4.48717	3.91186	3.62039e-06	4.88103e-05
SOX21-AS1|ENSG00000227640|lincRNA	4.56192	1.70668	3.63262e-06	4.89076e-05
AL357568.2|ENSG00000271917|sense_intronic	2.27271	2.84892	3.73733e-06	5.01871e-05
AC246785.3|ENSG00000237343|lincRNA	5.08519	3.4588	3.73794e-06	5.01871e-05
AC093772.1|ENSG00000248491|lincRNA	3.43334	1.83019	3.77264e-06	5.05835e-05
AC034213.1|ENSG00000250509|lincRNA	4.85499	3.2273	3.77812e-06	5.05874e-05
LINC01389|ENSG00000225762|antisense	2.01436	4.02654	3.78475e-06	5.06067e-05
LINC00326|ENSG00000231023|lincRNA	4.00825	0.654378	3.82147e-06	5.10278e-05
LINC00665|ENSG00000232677|lincRNA	3.05343	8.20574	3.84321e-06	5.1248e-05
AC015936.1|ENSG00000267334|lincRNA	2.53671	3.34672	3.87284e-06	5.14325e-05
AL138885.3|ENSG00000231056|lincRNA	5.13625	1.3466	3.87285e-06	5.14325e-05
LINC02469|ENSG00000248408|lincRNA	2.00747	2.18354	4.01365e-06	5.31577e-05
AP005230.1|ENSG00000263745|lincRNA	4.45229	1.87469	4.03435e-06	5.33594e-05
TLR8-AS1|ENSG00000233338|antisense	4.64857	2.09253	4.07946e-06	5.38103e-05
LINC01775|ENSG00000267201|lincRNA	3.39379	1.03285	4.16385e-06	5.48493e-05
AC026320.1|ENSG00000232353|lincRNA	4.64857	1.01977	4.17505e-06	5.49228e-05
LINC01362|ENSG00000230817|lincRNA	2.23221	3.95436	4.21123e-06	5.52744e-05
AP001178.3|ENSG00000266456|antisense	3.2608	1.88229	4.22444e-06	5.52744e-05
AC016987.1|ENSG00000259620|antisense	-2.06507	6.92869	4.33724e-06	5.66744e-05
LINC02429|ENSG00000251266|lincRNA	2.83757	1.0216	4.37541e-06	5.70968e-05
AC010201.1|ENSG00000271259|lincRNA	2.89201	1.93983	4.45782e-06	5.80171e-05
AC091917.2|ENSG00000248876|lincRNA	2.6977	3.9686	4.51026e-06	5.84972e-05
FAM87A|ENSG00000182366|lincRNA	3.30958	2.90665	4.51209e-06	5.84972e-05
AL356417.2|ENSG00000233682|antisense	2.80465	1.21818	4.5127e-06	5.84972e-05
AC234781.1|ENSG00000224216|antisense	2.21445	5.38446	4.58278e-06	5.91699e-05
AC051618.1|ENSG00000236958|sense_intronic	4.31671	3.46102	4.66684e-06	6.00963e-05
AC027130.1|ENSG00000261195|antisense	2.82895	1.56241	4.68086e-06	6.01975e-05
LINC01164|ENSG00000189275|lincRNA	5.70197	3.19482	4.78604e-06	6.14692e-05
PHACTR2-AS1|ENSG00000235740|antisense	4.2459	1.31689	4.82207e-06	6.18505e-05
AC243772.2|ENSG00000233030|antisense	2.53863	2.25414	4.85514e-06	6.21929e-05
AL606489.1|ENSG00000226330|antisense	3.34938	3.82224	4.91213e-06	6.28405e-05
HCG20|ENSG00000228022|lincRNA	3.25107	2.87376	4.97284e-06	6.35339e-05
LINC00689|ENSG00000231419|processed_transcript	3.70642	4.35455	4.99152e-06	6.36892e-05
SLC12A5-AS1|ENSG00000204044|antisense	2.70868	4.00367	5.17826e-06	6.588e-05
AL118511.2|ENSG00000225656|lincRNA	3.96164	2.17952	5.18347e-06	6.588e-05
AP000553.1|ENSG00000272954|sense_intronic	3.60133	2.08392	5.19739e-06	6.5971e-05
AL121721.1|ENSG00000243810|antisense	4.86576	1.69346	5.24021e-06	6.64281e-05
AC021192.1|ENSG00000249171|lincRNA	3.14191	5.79101	5.30912e-06	6.70405e-05
LINC01970|ENSG00000265692|lincRNA	3.07406	2.6644	5.44002e-06	6.86047e-05
LINC01269|ENSG00000258689|lincRNA	3.74598	2.49929	5.48689e-06	6.91051e-05
AC012309.2|ENSG00000267437|antisense	2.62152	3.76043	5.49386e-06	6.91051e-05
AC131254.3|ENSG00000254086|lincRNA	3.82454	0.565512	5.50939e-06	6.92112e-05
AC024937.3|ENSG00000260261|lincRNA	2.28721	4.28493	5.58208e-06	7.00343e-05
AC092447.5|ENSG00000233288|lincRNA	2.3252	5.17035	5.6328e-06	7.058e-05
AC008696.2|ENSG00000249881|sense_overlapping	2.7882	0.799977	5.86483e-06	7.31682e-05
LINC01967|ENSG00000235493|lincRNA	4.38109	1.02305	5.86934e-06	7.31682e-05
AC021393.1|ENSG00000254775|lincRNA	5.4608	1.40937	6.09278e-06	7.56636e-05
AC135371.1|ENSG00000226434|lincRNA	2.39445	1.88595	6.12877e-06	7.60138e-05
AL022158.1|ENSG00000224294|lincRNA	5.18845	1.91766	6.21203e-06	7.69206e-05
AL359551.1|ENSG00000231877|lincRNA	5.1441	2.29753	6.21764e-06	7.69206e-05
CLDN10-AS1|ENSG00000223392|antisense	4.72778	1.57192	6.33017e-06	7.82137e-05
IL21-AS1|ENSG00000227145|antisense	2.30074	2.65652	6.348e-06	7.83348e-05
LINC01029|ENSG00000265843|lincRNA	5.10209	1.8761	6.49048e-06	7.99175e-05
LINC01446|ENSG00000205628|lincRNA	4.89807	4.2382	6.51826e-06	8.0035e-05
AC020934.1|ENSG00000267424|antisense	4.48004	1.09009	6.51858e-06	8.0035e-05
LINC01747|ENSG00000230400|lincRNA	3.33496	1.01954	6.55468e-06	8.03772e-05
FAM74A1|ENSG00000215112|lincRNA	2.81821	4.79812	6.5794e-06	8.0579e-05
AC012572.1|ENSG00000265378|lincRNA	3.66274	4.76952	6.66469e-06	8.14088e-05
LINC02323|ENSG00000259230|lincRNA	4.27946	2.96468	6.66962e-06	8.14088e-05
AC098864.1|ENSG00000177822|antisense	2.42813	2.46437	6.67217e-06	8.14088e-05
AL022725.1|ENSG00000236336|antisense	2.43724	0.970352	6.68999e-06	8.15244e-05
AC007255.1|ENSG00000223813|antisense	2.19236	2.3028	6.74597e-06	8.19986e-05
AC113346.1|ENSG00000251144|lincRNA	2.22282	1.83039	6.75095e-06	8.19986e-05
AC013451.2|ENSG00000258976|lincRNA	4.01398	1.68755	6.75411e-06	8.19986e-05
AC073346.1|ENSG00000225457|processed_transcript	2.7826	0.720466	6.7966e-06	8.23097e-05
AC069272.1|ENSG00000250354|antisense	3.57154	0.610885	6.9388e-06	8.36229e-05
AC124067.1|ENSG00000253388|lincRNA	2.2396	2.12104	6.9393e-06	8.36229e-05
AC013400.1|ENSG00000271991|lincRNA	2.49613	1.37801	7.26399e-06	8.72593e-05
AL391832.1|ENSG00000237520|lincRNA	2.1658	3.86862	7.30887e-06	8.76435e-05
AL359881.1|ENSG00000269978|lincRNA	4.07266	2.09469	7.34932e-06	8.80205e-05
AC018809.1|ENSG00000269894|sense_intronic	2.96686	2.84399	7.44741e-06	8.9086e-05
BBOX1-AS1|ENSG00000254560|antisense	4.56674	3.87986	7.51038e-06	8.97293e-05
LINC01480|ENSG00000270164|lincRNA	4.3166	6.15632	7.58791e-06	9.04624e-05
GAPLINC|ENSG00000266835|lincRNA	2.89686	4.84415	7.6021e-06	9.04624e-05
CCDC39-AS1|ENSG00000243187|antisense	2.83294	5.06659	7.65697e-06	9.09242e-05
AC010457.1|ENSG00000251257|antisense	3.72593	2.51946	7.70072e-06	9.13326e-05
LINC01535|ENSG00000226686|lincRNA	3.64768	3.7134	7.82792e-06	9.27043e-05
AC107393.2|ENSG00000251676|lincRNA	3.66605	2.50253	7.83537e-06	9.27043e-05
LINC02154|ENSG00000235385|lincRNA	4.86074	1.74008	7.87602e-06	9.30725e-05
AC073352.1|ENSG00000272662|lincRNA	3.17747	2.0258	7.89791e-06	9.32183e-05
AC104134.1|ENSG00000225420|antisense	3.49741	2.15562	8.00476e-06	9.43323e-05
AC079239.1|ENSG00000248215|lincRNA	5.06033	1.54501	8.01163e-06	9.43323e-05
ELFN1-AS1|ENSG00000236081|lincRNA	4.0638	4.96362	8.18214e-06	9.61081e-05
LINC01297|ENSG00000225255|lincRNA	5.11372	1.95807	8.26295e-06	9.68243e-05
AL121985.1|ENSG00000228863|antisense	2.26742	4.67467	8.31585e-06	9.73274e-05
U73166.1|ENSG00000230454|lincRNA	2.06175	4.30965	8.33183e-06	9.734e-05
SSTR5-AS1|ENSG00000261713|processed_transcript	5.7816	7.61311	8.33687e-06	9.734e-05
AC108136.1|ENSG00000255325|lincRNA	3.55406	3.25502	8.50074e-06	9.88983e-05
AC009101.1|ENSG00000259859|lincRNA	3.73309	0.613874	8.51463e-06	9.8942e-05
LINC01198|ENSG00000231817|lincRNA	3.41652	1.32863	8.60996e-06	9.96937e-05
AL358452.1|ENSG00000229242|antisense	2.90196	4.8621	8.78891e-06	0.000101645
AL358473.1|ENSG00000229191|antisense	2.69856	1.15619	8.9621e-06	0.000103403
AC092343.1|ENSG00000247345|antisense	3.96695	1.16298	9.05867e-06	0.000104148
LINC02416|ENSG00000257924|lincRNA	2.95092	1.17629	9.16797e-06	0.000105281
AC019183.1|ENSG00000266450|lincRNA	3.68764	1.20138	9.1826e-06	0.000105325
AC009148.1|ENSG00000260495|antisense	2.59427	2.43881	9.4025e-06	0.000107594
AL445483.1|ENSG00000260088|lincRNA	2.04663	3.56658	9.72954e-06	0.000110688
AC104958.1|ENSG00000248318|antisense	3.01122	2.64696	9.80426e-06	0.000111149
AP001972.4|ENSG00000255395|antisense	4.66777	3.67174	9.96421e-06	0.000112831
AC112493.1|ENSG00000242021|lincRNA	4.25893	2.2655	1.02735e-05	0.000116064
AC105446.1|ENSG00000227053|antisense	2.74837	3.49554	1.03041e-05	0.000116276
AC107419.1|ENSG00000228933|lincRNA	4.26046	2.74293	1.03615e-05	0.000116789
LINC01224|ENSG00000269416|lincRNA	4.14944	4.58891	1.0407e-05	0.000117165
AC005858.1|ENSG00000275212|lincRNA	4.00589	2.97673	1.05807e-05	0.000118711
AC007099.1|ENSG00000231172|antisense	4.63756	4.0386	1.06098e-05	0.0001189
DLEU2L|ENSG00000116652|sense_intronic	-2.02196	10.9854	1.06518e-05	0.000119234
MIR200CHG|ENSG00000257084|lincRNA	3.46792	2.28675	1.07139e-05	0.000119792
LINC00462|ENSG00000233610|lincRNA	2.89301	1.23991	1.07768e-05	0.000120267
HOXB-AS2|ENSG00000239552|antisense	2.25737	2.47866	1.09975e-05	0.000122402
AC010223.1|ENSG00000279028|antisense	2.4294	2.19436	1.12964e-05	0.00012532
AC011840.1|ENSG00000231421|processed_transcript	4.8774	3.0104	1.12982e-05	0.00012532
AL162464.1|ENSG00000258601|antisense	2.29846	1.18856	1.13511e-05	0.000125764
TTLL10-AS1|ENSG00000205231|antisense	2.4631	4.61438	1.14151e-05	0.000126186
AC004540.2|ENSG00000225792|antisense	-2.27401	5.02864	1.14882e-05	0.000126851
AL365500.1|ENSG00000227313|lincRNA	3.81827	0.64574	1.16475e-05	0.000128251
AC211476.2|ENSG00000272843|antisense	3.00439	1.64894	1.16544e-05	0.000128251
AC068506.1|ENSG00000278464|lincRNA	2.20456	4.36749	1.17428e-05	0.000128933
AL080312.2|ENSG00000275358|lincRNA	2.62923	1.18222	1.1972e-05	0.000131155
AC074389.2|ENSG00000231476|lincRNA	3.10525	3.2051	1.19939e-05	0.000131182
LINC02428|ENSG00000248740|lincRNA	-2.05116	7.73802	1.20014e-05	0.000131182
AC022447.5|ENSG00000249114|sense_intronic	4.98861	1.27018	1.20491e-05	0.000131556
AC132872.2|ENSG00000264548|antisense	2.77735	2.65411	1.21155e-05	0.000131986
AL353801.2|ENSG00000234504|antisense	2.35312	5.45302	1.21568e-05	0.000132289
AC096637.2|ENSG00000231057|antisense	3.5747	1.36747	1.23993e-05	0.000134328
AL391056.1|ENSG00000227619|lincRNA	4.37602	5.84573	1.24638e-05	0.000134877
LINC01287|ENSG00000234722|lincRNA	2.39209	8.25894	1.25564e-05	0.000135578
AL360295.1|ENSG00000229913|antisense	2.13237	1.59319	1.26072e-05	0.000135827
AL138900.2|ENSG00000237189|lincRNA	5.23853	1.65292	1.26335e-05	0.000135933
AC073941.1|ENSG00000259255|lincRNA	2.65424	2.49662	1.26966e-05	0.000136188
AC009248.2|ENSG00000278351|sense_intronic	2.31701	2.19737	1.27638e-05	0.000136609
AL355303.1|ENSG00000224034|lincRNA	3.3575	3.25287	1.31024e-05	0.000139926
AP000844.2|ENSG00000238117|antisense	4.78555	2.3489	1.31744e-05	0.000140496
AL161668.3|ENSG00000258604|lincRNA	-2.0631	6.47622	1.31913e-05	0.000140496
AL033381.2|ENSG00000270937|lincRNA	4.7401	1.5947	1.35077e-05	0.000143158
AC002127.2|ENSG00000233420|lincRNA	3.29766	1.98022	1.37371e-05	0.000145274
AP001057.1|ENSG00000232124|antisense	2.1132	3.48231	1.38151e-05	0.000145941
AC092120.2|ENSG00000261692|sense_intronic	2.59719	5.05351	1.38779e-05	0.000146446
LINC02384|ENSG00000251301|lincRNA	2.65888	7.17792	1.40058e-05	0.000147636
AC126773.2|ENSG00000260577|antisense	2.62093	1.14548	1.40309e-05	0.000147741
LINC01384|ENSG00000237396|lincRNA	2.63291	0.183222	1.42197e-05	0.000149406
LINC01105|ENSG00000232044|processed_transcript	3.45457	1.66384	1.42761e-05	0.000149838
AC100827.4|ENSG00000260672|lincRNA	2.94831	0.998018	1.43121e-05	0.000150054
AC106801.1|ENSG00000253519|antisense	3.38298	2.00339	1.46139e-05	0.00015289
Z82249.1|ENSG00000233179|lincRNA	5.68008	2.74476	1.48011e-05	0.000154517
AC124017.1|ENSG00000249341|sense_intronic	4.17372	1.39508	1.49865e-05	0.000156119
AC012640.1|ENSG00000248968|antisense	2.4825	2.06634	1.57103e-05	0.00016331
AL035045.1|ENSG00000233625|lincRNA	4.23508	1.90863	1.62239e-05	0.00016835
AC023830.3|ENSG00000278434|sense_intronic	2.82334	2.48504	1.62296e-05	0.00016835
AC012213.1|ENSG00000253477|antisense	2.17048	1.08625	1.63765e-05	0.000169513
AC073655.1|ENSG00000258172|antisense	2.66913	1.04457	1.66882e-05	0.000172191
AL772363.1|ENSG00000203987|antisense	3.60272	0.602029	1.67883e-05	0.000172859
AL121899.1|ENSG00000226644|lincRNA	2.03976	5.79973	1.70173e-05	0.000174684
AL139246.4|ENSG00000229393|antisense	3.75619	1.16356	1.70933e-05	0.000175261
C9orf170|ENSG00000204446|lincRNA	2.30825	6.42987	1.72581e-05	0.000176579
LINC02313|ENSG00000258474|lincRNA	3.56125	2.7832	1.74091e-05	0.000177937
AC010789.1|ENSG00000224817|lincRNA	4.46965	1.08595	1.75788e-05	0.000179484
AL390778.2|ENSG00000233936|lincRNA	-2.48798	3.2115	1.7712e-05	0.000179791
AC073174.1|ENSG00000227121|lincRNA	-2.46732	2.27175	1.77194e-05	0.000179791
LINC00237|ENSG00000225127|lincRNA	3.04936	1.966	1.78574e-05	0.00018059
ATP2A1-AS1|ENSG00000260442|antisense	3.11226	3.42861	1.78616e-05	0.00018059
SCHLAP1|ENSG00000281131|lincRNA	4.41959	1.338	1.78721e-05	0.00018059
LINC02454|ENSG00000256268|lincRNA	2.08398	2.88231	1.84015e-05	0.000185555
LINC01231|ENSG00000236511|lincRNA	3.61214	2.14882	1.84684e-05	0.000186031
AC025171.3|ENSG00000251131|antisense	2.09038	1.65708	1.85059e-05	0.000186031
AC144833.1|ENSG00000261426|sense_intronic	3.72448	2.59586	1.88719e-05	0.000189125
AC060814.6|ENSG00000280881|lincRNA	2.34443	0.341262	1.89286e-05	0.0001895
AC121338.1|ENSG00000205537|antisense	3.20829	1.76675	1.91098e-05	0.000190727
LINC02421|ENSG00000255970|lincRNA	3.49447	1.27602	1.9348e-05	0.000192907
AC034228.1|ENSG00000223548|antisense	5.45236	2.26967	1.96274e-05	0.000195493
AC005264.1|ENSG00000267551|antisense	2.76026	1.7367	1.9898e-05	0.000197986
AC006557.1|ENSG00000267150|antisense	3.39053	1.00023	2.00053e-05	0.000198851
AL445647.1|ENSG00000272046|lincRNA	3.87039	1.99533	2.00322e-05	0.000198916
AC023421.2|ENSG00000267193|antisense	3.57346	0.936793	2.00749e-05	0.000199137
CAMTA1-IT1|ENSG00000237402|sense_intronic	3.12961	1.3973	2.01614e-05	0.000199792
AL590399.3|ENSG00000231212|lincRNA	3.54822	0.794757	2.04789e-05	0.000202528
AP002754.1|ENSG00000250230|lincRNA	2.51055	0.566281	2.05705e-05	0.000203126
AP004147.1|ENSG00000250493|antisense	2.83048	1.77388	2.09697e-05	0.000206544
AL133368.2|ENSG00000258693|lincRNA	2.66607	0.577517	2.13026e-05	0.000209128
AL162725.2|ENSG00000237153|lincRNA	2.9304	0.845388	2.13132e-05	0.000209128
TRPC7-AS1|ENSG00000248211|antisense	2.54783	2.34023	2.13696e-05	0.000209426
AC002351.1|ENSG00000258240|lincRNA	3.68401	1.61285	2.14331e-05	0.000209838
AC097512.1|ENSG00000248837|lincRNA	4.60728	2.56447	2.15695e-05	0.000210868
AC092490.1|ENSG00000249790|lincRNA	3.6887	5.9173	2.17116e-05	0.000211927
AC113331.1|ENSG00000236897|lincRNA	3.23277	0.27	2.20867e-05	0.000215373
AL359643.2|ENSG00000271978|lincRNA	2.10206	8.72719	2.23093e-05	0.000217326
AC004477.1|ENSG00000263412|processed_transcript	2.88822	4.44532	2.30598e-05	0.00022419
AL021328.1|ENSG00000269985|antisense	-2.0777	5.28312	2.31218e-05	0.000224569
C17orf82|ENSG00000187013|lincRNA	2.8373	4.44215	2.33065e-05	0.000226138
LUCAT1|ENSG00000248323|lincRNA	3.96608	5.66875	2.351e-05	0.000227209
AC108727.2|ENSG00000251270|antisense	3.67931	0.390899	2.39968e-05	0.000231227
AC104072.1|ENSG00000260878|sense_overlapping	5.09156	2.52352	2.41128e-05	0.000232115
FP325330.2|ENSG00000278890|lincRNA	2.02615	0.409517	2.56068e-05	0.000244328
U91328.4|ENSG00000272810|lincRNA	2.40638	2.71515	2.58749e-05	0.000246405
AC025575.2|ENSG00000258053|lincRNA	3.77095	3.22381	2.59534e-05	0.000246912
LINC01885|ENSG00000237880|lincRNA	2.63997	5.60472	2.65226e-05	0.000251836
LINC01570|ENSG00000260338|antisense	2.36483	0.266848	2.68494e-05	0.000254444
AC060834.2|ENSG00000234710|lincRNA	4.85665	1.66357	2.69954e-05	0.000255085
LINC01855|ENSG00000267517|lincRNA	2.56504	0.949235	2.70308e-05	0.000255172
AC245595.1|ENSG00000232527|lincRNA	2.32337	3.20471	2.723e-05	0.000256804
AC092171.4|ENSG00000272953|lincRNA	2.54826	3.4121	2.73034e-05	0.00025716
BX322234.2|ENSG00000233085|lincRNA	3.81393	1.12823	2.73468e-05	0.00025716
MNX1-AS2|ENSG00000235029|antisense	3.40664	1.58255	2.76429e-05	0.000259195
AL451050.2|ENSG00000272205|lincRNA	2.42416	3.0555	2.8057e-05	0.000262826
AC090707.1|ENSG00000254906|antisense	2.54918	4.97413	2.82668e-05	0.000264538
AL031429.2|ENSG00000269933|sense_intronic	2.26478	5.83428	2.87221e-05	0.000268283
LINC01615|ENSG00000223485|lincRNA	3.28767	3.10144	2.95677e-05	0.000274765
AC016773.1|ENSG00000270195|lincRNA	2.88747	4.03545	2.95849e-05	0.000274765
ERICH3-AS1|ENSG00000234497|antisense	3.49355	1.65659	2.96419e-05	0.000274772
CRNDE|ENSG00000245694|lincRNA	3.39845	6.92426	3.00783e-05	0.000278288
AC084866.2|ENSG00000251200|antisense	2.39486	4.63419	3.03449e-05	0.000280136
AC116614.1|ENSG00000235688|antisense	2.21192	1.21251	3.03641e-05	0.000280136
AC073111.1|ENSG00000239377|antisense	3.20722	1.39184	3.03983e-05	0.000280186
AC011352.1|ENSG00000248362|antisense	3.96535	1.0202	3.11405e-05	0.000286456
GS1-279B7.1|ENSG00000261024|lincRNA	2.60829	6.6957	3.11862e-05	0.000286456
AC024243.1|ENSG00000272969|antisense	2.96619	1.13131	3.15257e-05	0.000288941
AC091133.1|ENSG00000230532|antisense	2.1021	2.39113	3.20557e-05	0.000292984
LINC00683|ENSG00000266256|lincRNA	-2.11749	2.22289	3.20569e-05	0.000292984
AC091059.1|ENSG00000266002|antisense	2.56265	3.69637	3.22253e-05	0.000294248
AL138828.1|ENSG00000237596|antisense	3.77449	5.76362	3.24081e-05	0.000295365
AC068675.1|ENSG00000267747|antisense	3.63337	1.22315	3.24435e-05	0.000295412
LINC02365|ENSG00000254233|lincRNA	4.27054	6.92794	3.25159e-05	0.000295795
LINC02202|ENSG00000245812|lincRNA	2.87225	3.26452	3.2575e-05	0.000296056
AC108865.2|ENSG00000272218|lincRNA	4.45122	1.47856	3.30697e-05	0.000299715
AL137060.1|ENSG00000274270|sense_intronic	2.64274	2.90592	3.3561e-05	0.000303323
AC099566.1|ENSG00000237435|lincRNA	2.62833	5.36291	3.46717e-05	0.000311917
AC092652.1|ENSG00000231758|antisense	4.98128	1.49252	3.47701e-05	0.000312515
AC090186.1|ENSG00000272076|lincRNA	2.4986	3.04829	3.56206e-05	0.000318691
AP003174.1|ENSG00000255689|lincRNA	2.07949	3.16817	3.70706e-05	0.000331057
MCHR2-AS1|ENSG00000229315|antisense	2.58723	0.217079	3.72075e-05	0.000331977
AC020928.1|ENSG00000267260|lincRNA	3.31448	2.52227	3.73319e-05	0.000332721
NRIR|ENSG00000225964|antisense	2.07081	3.30096	3.77119e-05	0.000335251
AL033527.3|ENSG00000261798|antisense	3.16465	1.80246	3.7905e-05	0.000336661
AC010735.1|ENSG00000261379|sense_intronic	3.27673	1.7915	3.80502e-05	0.000337644
LINC02247|ENSG00000223729|lincRNA	2.62129	6.19589	3.8303e-05	0.00033927
LINC02188|ENSG00000261175|lincRNA	4.09028	4.72119	3.84065e-05	0.000339614
AC008892.1|ENSG00000249236|lincRNA	2.27647	1.09541	3.91965e-05	0.000346241
AC239803.4|ENSG00000274372|lincRNA	2.75426	2.48457	3.93206e-05	0.00034671
AC112251.1|ENSG00000251129|lincRNA	2.08213	6.56538	3.93861e-05	0.000346975
AL139041.1|ENSG00000271631|antisense	2.69932	1.23569	3.94487e-05	0.000347213
AC010997.5|ENSG00000273248|lincRNA	2.9708	1.42201	3.95636e-05	0.000347597
LINC01517|ENSG00000232624|processed_transcript	2.57865	1.01268	4.06522e-05	0.000355242
AC007192.2|ENSG00000269145|antisense	2.13056	0.266717	4.1416e-05	0.00036127
AC114811.2|ENSG00000260641|antisense	3.76635	3.29811	4.18607e-05	0.000364823
AC073359.1|ENSG00000243953|lincRNA	3.49199	0.310771	4.49846e-05	0.000390654
AC239803.1|ENSG00000215859|lincRNA	2.441	3.53416	4.69838e-05	0.000405131
AC011352.3|ENSG00000251320|antisense	2.75538	1.31043	4.73976e-05	0.000408339
AC018648.1|ENSG00000272905|lincRNA	2.84233	1.76611	4.7499e-05	0.000408851
AC090568.2|ENSG00000253553|antisense	3.50193	2.64301	4.75921e-05	0.000409292
LINC01813|ENSG00000229805|lincRNA	2.35346	4.13406	4.84035e-05	0.000415538
LINC02360|ENSG00000248300|lincRNA	2.52876	2.23373	4.86563e-05	0.000417341
AL021807.1|ENSG00000272468|lincRNA	2.86595	3.74779	4.87227e-05	0.000417543
AC068831.8|ENSG00000278514|lincRNA	2.40528	0.790025	4.89772e-05	0.000418756
AC011466.3|ENSG00000269534|antisense	2.44939	1.1244	4.98762e-05	0.000425561
AC010615.2|ENSG00000268119|processed_transcript	2.49095	4.3979	5.00153e-05	0.000426375
LINC01179|ENSG00000249500|lincRNA	2.47985	0.555083	5.20383e-05	0.000443234
UPK1A-AS1|ENSG00000226510|antisense	3.66125	2.83462	5.22617e-05	0.000444748
AC005828.3|ENSG00000263644|antisense	2.12662	1.93523	5.24787e-05	0.000446206
AC106736.1|ENSG00000261260|lincRNA	3.0686	0.554231	5.26353e-05	0.000447148
AC128689.1|ENSG00000240086|processed_transcript	2.23273	1.5314	5.31462e-05	0.000451096
LINC01361|ENSG00000236268|lincRNA	4.65372	3.7246	5.33296e-05	0.000451474
PGM5P3-AS1|ENSG00000277631|lincRNA	2.93857	1.16322	5.36959e-05	0.000453788
AC025171.5|ENSG00000272382|lincRNA	2.52842	2.9356	5.39267e-05	0.000455244
LINC01036|ENSG00000236030|lincRNA	4.35837	1.03602	5.45406e-05	0.000459733
AL359878.1|ENSG00000205740|processed_transcript	2.72794	2.61534	5.48742e-05	0.000462146
AC012617.1|ENSG00000267053|lincRNA	2.9224	2.5087	5.562e-05	0.000467574
AC044840.1|ENSG00000266696|antisense	2.22868	2.83109	5.56752e-05	0.000467574
UNC5B-AS1|ENSG00000237512|antisense	2.77529	2.70085	5.57103e-05	0.000467574
KIAA1614-AS1|ENSG00000232586|antisense	2.79576	1.96089	5.59521e-05	0.000468616
SAMMSON|ENSG00000240405|lincRNA	4.13194	1.17407	5.59785e-05	0.000468616
AL110292.1|ENSG00000258081|lincRNA	3.83538	1.46756	5.90728e-05	0.00049325
AC106892.1|ENSG00000250791|lincRNA	4.57552	1.47551	6.22397e-05	0.000515958
LINC01378|ENSG00000236922|lincRNA	2.19778	2.58963	6.22681e-05	0.000515958
AL024498.1|ENSG00000272097|lincRNA	2.40177	2.3196	6.2622e-05	0.000518199
AC023355.1|ENSG00000259488|antisense	2.60957	2.98441	6.26978e-05	0.000518199
LINC00173|ENSG00000196668|processed_transcript	2.57002	2.80107	6.28962e-05	0.000519399
LINC01976|ENSG00000261514|lincRNA	3.40338	0.855	6.30353e-05	0.000520108
AC008808.1|ENSG00000248918|lincRNA	2.91641	0.156046	6.35344e-05	0.000523783
AC084365.1|ENSG00000257995|lincRNA	3.05656	0.141084	6.4128e-05	0.000528231
AC079031.2|ENSG00000256875|lincRNA	2.73972	0.164547	6.42179e-05	0.000528525
AC008870.4|ENSG00000261723|antisense	2.7167	1.05844	6.49708e-05	0.000534271
AC087380.1|ENSG00000167355|processed_transcript	2.30831	8.57557	6.5082e-05	0.000534735
LINC00885|ENSG00000224652|lincRNA	-2.16782	5.33657	6.55937e-05	0.000538034
AC025265.3|ENSG00000257766|antisense	2.23451	5.65245	6.63223e-05	0.000543097
CU634019.2|ENSG00000278884|lincRNA	2.00139	0.306357	6.71981e-05	0.000548707
AC093810.1|ENSG00000249052|lincRNA	2.03519	3.34263	6.72322e-05	0.000548707
AC092264.1|ENSG00000229846|antisense	2.10301	2.64531	6.8521e-05	0.000557192
Z95114.2|ENSG00000279714|lincRNA	3.00843	1.46835	6.99202e-05	0.000567797
AL162431.2|ENSG00000243155|antisense	2.59188	4.75401	7.09253e-05	0.000574527
AC009039.1|ENSG00000261470|antisense	2.0304	0.318823	7.09256e-05	0.000574527
OVOL1-AS1|ENSG00000255120|antisense	2.99802	3.89205	7.22265e-05	0.000583612
LINC01551|ENSG00000186960|lincRNA	2.59932	1.62373	7.2957e-05	0.00058826
AC078860.1|ENSG00000257761|antisense	3.38225	1.00183	7.32375e-05	0.000589828
AC126768.2|ENSG00000248994|lincRNA	3.53509	1.45757	7.35077e-05	0.00059111
LINC01353|ENSG00000231507|lincRNA	2.80098	2.25512	7.42474e-05	0.000595994
MIR9-3HG|ENSG00000255571|lincRNA	3.79095	6.57412	7.585e-05	0.000607859
AC113404.1|ENSG00000250348|antisense	3.26316	3.28784	7.61364e-05	0.000609154
AL450998.2|ENSG00000224459|antisense	3.39814	1.51689	7.66452e-05	0.000612703
AC012413.1|ENSG00000253664|antisense	2.8365	0.379304	7.76383e-05	0.000618634
LINC02253|ENSG00000259485|lincRNA	4.27599	2.52306	7.82776e-05	0.000623159
AC092159.2|ENSG00000233296|antisense	3.08094	2.3053	7.83338e-05	0.000623159
AC026310.2|ENSG00000255921|antisense	2.73357	0.966212	8.00514e-05	0.000635787
LINC01116|ENSG00000163364|lincRNA	3.23496	5.06784	8.0655e-05	0.00063954
AC141928.1|ENSG00000250986|lincRNA	2.5584	4.51983	8.07952e-05	0.000640132
LINC01777|ENSG00000235054|lincRNA	4.0761	1.1174	8.10489e-05	0.000641621
AL139002.1|ENSG00000233379|lincRNA	3.97105	2.0695	8.16624e-05	0.000645954
AC108463.2|ENSG00000230499|lincRNA	2.51617	2.13499	8.63498e-05	0.000678631
AC078909.2|ENSG00000274444|lincRNA	2.74041	2.32781	8.78529e-05	0.000689889
AL596223.2|ENSG00000231748|antisense	3.24878	1.94691	8.8036e-05	0.000690771
AC018607.1|ENSG00000254325|sense_intronic	2.12533	0.422349	8.92033e-05	0.000698091
LINC01996|ENSG00000261863|lincRNA	4.6253	1.23433	8.95601e-05	0.000699357
AJ011931.1|ENSG00000276633|sense_intronic	4.0099	1.04702	9.19134e-05	0.000716015
AC103770.1|ENSG00000254251|antisense	4.55577	3.59352	9.19936e-05	0.000716068
AC018553.1|ENSG00000277559|lincRNA	2.79327	5.0997	9.43523e-05	0.000732675
AC011287.1|ENSG00000229618|lincRNA	3.2795	1.55026	9.63327e-05	0.000745681
AL121900.1|ENSG00000233993|antisense	2.1633	0.0927991	9.70853e-05	0.000750911
AC084030.1|ENSG00000232328|lincRNA	2.70569	1.982	9.76483e-05	0.000754668
IGF2BP2-AS1|ENSG00000163915|antisense	3.38554	3.03577	9.83745e-05	0.000759679
LINC02393|ENSG00000256597|lincRNA	2.0421	0.939057	9.92865e-05	0.000764906
AC010503.2|ENSG00000268203|antisense	2.59356	4.77732	9.98465e-05	0.000768008
AC103769.1|ENSG00000253475|sense_intronic	2.57484	0.67733	0.000100687	0.000773257
AL031665.1|ENSG00000274269|processed_transcript	3.36225	1.1591	0.000103321	0.000790373
AC025154.2|ENSG00000257588|antisense	3.77913	1.37055	0.000104536	0.000798414
AC009303.2|ENSG00000235066|antisense	2.24523	1.69004	0.000106844	0.000814134
AL359397.1|ENSG00000258857|lincRNA	2.95443	0.891175	0.000107273	0.000816761
AC012588.1|ENSG00000263677|lincRNA	2.86686	0.715296	0.000107904	0.00082012
AL133215.2|ENSG00000273162|lincRNA	2.6129	2.64231	0.000108285	0.000821904
LINC02027|ENSG00000243694|lincRNA	-2.23302	6.11047	0.000112091	0.000848152
AC118653.1|ENSG00000225818|lincRNA	2.41533	0.597293	0.000114279	0.000861374
AL583808.1|ENSG00000225087|lincRNA	3.91538	1.12158	0.000114608	0.000863187
AL138760.1|ENSG00000235939|antisense	3.26791	0.967981	0.000116108	0.000873133
AL132655.2|ENSG00000268649|lincRNA	3.55792	1.53091	0.000116681	0.000876545
AL353593.2|ENSG00000269934|antisense	2.07558	1.76546	0.000116741	0.000876545
LINC01074|ENSG00000227611|lincRNA	2.16492	3.73817	0.000117398	0.000880802
AC007064.2|ENSG00000237689|lincRNA	3.37481	1.03891	0.000117886	0.000882814
AC092674.1|ENSG00000249036|lincRNA	2.19144	1.03973	0.00011878	0.000888436
AL163952.1|ENSG00000259868|processed_transcript	3.42429	2.54369	0.00012114	0.000905395
AL355102.4|ENSG00000258793|antisense	2.09594	5.89163	0.000125144	0.000931046
C3orf67-AS1|ENSG00000242428|antisense	3.0111	1.72363	0.0001253	0.000931492
AL390730.2|ENSG00000238022|antisense	2.61378	4.83335	0.000126164	0.000936491
LINC00511|ENSG00000227036|lincRNA	3.04856	7.17703	0.000127514	0.000943641
LINC02200|ENSG00000250358|lincRNA	4.42723	3.82711	0.000127634	0.000943813
AL109976.1|ENSG00000277287|lincRNA	2.59416	3.59725	0.000130419	0.000961499
LINC00958|ENSG00000251381|lincRNA	3.80246	3.754	0.000130647	0.000962449
AL353708.3|ENSG00000272906|lincRNA	2.43372	3.81919	0.000132865	0.000977315
AC008741.2|ENSG00000274925|lincRNA	2.19626	5.34626	0.000133108	0.000978365
MAFG-AS1|ENSG00000265688|antisense	2.90364	6.54507	0.000134906	0.0009886
LINC00943|ENSG00000189238|lincRNA	2.4322	1.99921	0.000136284	0.00099795
LINC01977|ENSG00000262772|lincRNA	2.91615	3.25997	0.000136677	0.00099915
AP000679.1|ENSG00000176984|antisense	2.74667	1.40169	0.000136755	0.00099915
PGM5P4-AS1|ENSG00000231943|lincRNA	2.41352	0.696687	0.000138702	0.00101014
LINC00601|ENSG00000235180|lincRNA	4.30372	1.63018	0.000139945	0.00101789
LINC01589|ENSG00000238120|antisense	3.80428	3.77744	0.000141258	0.00102515
CASC22|ENSG00000260887|lincRNA	3.52212	2.38532	0.00014215	0.00103009
TTC39A-AS1|ENSG00000261664|antisense	2.8853	2.62758	0.000143009	0.00103478
AC011445.2|ENSG00000269246|lincRNA	2.76482	4.17968	0.000143238	0.0010349
DUXAP8|ENSG00000206195|processed_transcript	3.01815	5.90276	0.000143679	0.00103641
SNHG4|ENSG00000281398|processed_transcript	2.36143	4.87275	0.000143872	0.00103641
SRGAP3-AS4|ENSG00000235830|lincRNA	2.51571	1.23982	0.000144839	0.00104184
MYHAS|ENSG00000272975|antisense	3.21765	1.32861	0.000148861	0.00106527
AC020637.1|ENSG00000258231|lincRNA	4.24311	1.56553	0.000149726	0.00107068
AL109807.1|ENSG00000238034|lincRNA	4.59926	1.20821	0.000150211	0.00107258
AC079075.2|ENSG00000259561|sense_intronic	2.09138	4.53501	0.000150916	0.00107626
AC010267.1|ENSG00000249150|lincRNA	2.48542	0.353479	0.000151576	0.00107995
AC087627.1|ENSG00000253983|antisense	3.01163	1.41447	0.000152266	0.00108408
LINC01983|ENSG00000223783|lincRNA	2.26994	6.20016	0.000153057	0.00108891
KCCAT198|ENSG00000257642|antisense	3.60171	1.03562	0.000156003	0.00110825
MIR4300HG|ENSG00000245832|lincRNA	3.13972	1.08238	0.000157578	0.00111782
PTCHD1-AS|ENSG00000233067|lincRNA	2.05886	1.3506	0.000158961	0.00112436
AC025176.1|ENSG00000250081|lincRNA	2.71401	1.72619	0.000159121	0.00112467
AC118755.1|ENSG00000262296|antisense	2.96901	6.23146	0.000160991	0.00113543
AC105243.1|ENSG00000261780|processed_transcript	2.03075	3.8957	0.000161533	0.00113843
AC006538.1|ENSG00000261342|sense_intronic	2.17484	3.67818	0.000162125	0.00114177
AC023824.1|ENSG00000260073|lincRNA	4.11972	1.01602	0.000163907	0.001151
AC108868.1|ENSG00000231505|lincRNA	4.4219	2.11913	0.000165407	0.00115987
AC079760.2|ENSG00000243144|lincRNA	3.20788	2.43221	0.000166162	0.00116433
AC106038.1|ENSG00000246792|antisense	2.69325	1.60465	0.000167629	0.00117376
MIR217HG|ENSG00000226702|lincRNA	3.72196	3.15601	0.00016872	0.00117887
BX284668.6|ENSG00000272426|lincRNA	2.12544	1.37003	0.000170192	0.0011883
LINC01896|ENSG00000263146|lincRNA	4.11327	1.18628	0.000172233	0.00120083
AC006004.1|ENSG00000236795|antisense	2.26446	4.36328	0.000172935	0.0012041
AC126118.1|ENSG00000271993|antisense	2.37154	2.44819	0.00017352	0.0012055
LINC01549|ENSG00000232560|lincRNA	3.55194	5.87514	0.000175821	0.00121939
DPP10-AS1|ENSG00000235026|antisense	2.12225	4.83916	0.000175894	0.00121939
AC004852.2|ENSG00000278254|lincRNA	2.97126	8.07753	0.000176074	0.00121977
AC008109.1|ENSG00000266602|lincRNA	3.57759	4.62441	0.000176687	0.00122228
AC068987.1|ENSG00000259887|lincRNA	2.4847	2.63085	0.000181824	0.00125604
AC026523.1|ENSG00000259582|lincRNA	3.59207	1.88527	0.00018408	0.0012699
LINC02158|ENSG00000225611|antisense	3.93614	7.7845	0.000184091	0.0012699
AC009275.1|ENSG00000273297|lincRNA	2.87638	4.89802	0.000184863	0.00127343
AC008568.1|ENSG00000229855|lincRNA	2.83309	1.07015	0.000186613	0.00128367
AC090200.1|ENSG00000254357|antisense	2.49717	0.463487	0.000187575	0.00128847
AC021517.1|ENSG00000266988|sense_intronic	3.06101	0.307234	0.000189208	0.00129787
AC007614.4|ENSG00000260769|lincRNA	2.80042	1.40357	0.000191293	0.00131032
AP000439.1|ENSG00000255606|lincRNA	3.98612	2.23298	0.000196786	0.00134324
AC096711.3|ENSG00000251598|lincRNA	2.10069	2.59879	0.000198594	0.00135368
AC091057.3|ENSG00000269974|lincRNA	2.51619	2.43265	0.000204224	0.00138722
AC132192.2|ENSG00000268403|antisense	2.50117	5.2624	0.000204664	0.00138924
AP001596.1|ENSG00000232692|antisense	2.94415	1.35617	0.000206995	0.00140214
AL513318.2|ENSG00000269994|lincRNA	3.63113	3.25793	0.000210269	0.00142135
AL109754.1|ENSG00000243961|lincRNA	3.21138	1.99211	0.000211965	0.00143084
AC130456.5|ENSG00000260934|antisense	2.14257	4.37469	0.000213779	0.00144009
CDRT7|ENSG00000259944|lincRNA	2.32393	0.857579	0.000221892	0.00149269
AC137810.1|ENSG00000248969|antisense	2.88878	0.320087	0.00022301	0.00149711
AC068189.1|ENSG00000245080|antisense	2.05058	1.26232	0.000226712	0.00151988
LINC00624|ENSG00000278811|antisense	2.86515	5.39307	0.000229929	0.00153827
MAPT-IT1|ENSG00000279685|sense_intronic	2.90398	2.05185	0.000231587	0.00154724
AC017076.1|ENSG00000271947|lincRNA	2.95798	1.83718	0.000239309	0.00159138
HOXC13-AS|ENSG00000249641|antisense	3.40619	0.898669	0.000239335	0.00159138
HRAT92|ENSG00000223855|lincRNA	2.76	5.22785	0.000241113	0.00160211
LINC02252|ENSG00000261304|lincRNA	3.57642	0.971191	0.000243651	0.00161723
AP003969.1|ENSG00000255233|lincRNA	2.15655	4.67591	0.000243719	0.00161723
AC026495.1|ENSG00000258654|lincRNA	2.92398	2.10937	0.000247483	0.00163664
AC023908.3|ENSG00000261136|antisense	2.32929	3.01508	0.000252528	0.00166549
AP000997.1|ENSG00000255599|lincRNA	3.01793	1.62103	0.000253482	0.00167066
AP003390.1|ENSG00000254854|antisense	2.38286	2.06873	0.000258714	0.00170169
AC104793.1|ENSG00000249568|antisense	4.20977	0.985487	0.000261173	0.0017144
LINC01854|ENSG00000204460|lincRNA	3.68726	0.961725	0.000261799	0.00171735
AL645939.5|ENSG00000272236|lincRNA	2.73418	1.70486	0.00026614	0.00174153
AL121890.4|ENSG00000277425|lincRNA	2.42172	1.04723	0.000277734	0.00180851
AC010907.2|ENSG00000237370|antisense	2.42869	2.51559	0.000278966	0.0018139
AL138900.1|ENSG00000228239|lincRNA	2.3967	0.279509	0.000279119	0.0018139
AC064853.1|ENSG00000236116|sense_intronic	3.98655	1.83717	0.000282207	0.00183153
DSCAM-IT1|ENSG00000233756|sense_intronic	2.30369	3.55493	0.000283357	0.00183777
AC104041.1|ENSG00000259692|lincRNA	3.43328	1.75769	0.000284095	0.00184134
AL359881.3|ENSG00000270171|lincRNA	3.59207	1.49031	0.00028765	0.00186067
AC024257.3|ENSG00000269514|lincRNA	2.04452	2.11363	0.000289748	0.001873
AC079089.1|ENSG00000246528|antisense	2.91131	1.55774	0.000291163	0.00187908
LINC02114|ENSG00000249521|lincRNA	2.28504	1.24458	0.000291459	0.00187908
IBA57-AS1|ENSG00000203684|lincRNA	2.35765	2.07954	0.000296119	0.00190661
AL138737.1|ENSG00000236013|lincRNA	3.44677	2.61077	0.000302568	0.001943
AC009097.3|ENSG00000260612|lincRNA	3.13567	0.681738	0.000307603	0.00197145
LINC00640|ENSG00000258479|lincRNA	2.57952	1.71713	0.000309135	0.00197867
LINC01108|ENSG00000226673|lincRNA	2.79805	3.6089	0.00031336	0.00200177
LINC00858|ENSG00000229404|lincRNA	3.20885	1.68247	0.000314948	0.00200928
WASIR2|ENSG00000231439|lincRNA	2.92609	1.47415	0.000317034	0.00201776
AC006305.1|ENSG00000206129|lincRNA	3.32638	3.44457	0.000317202	0.00201776
LINC01012|ENSG00000281706|lincRNA	2.72956	1.76463	0.000317309	0.00201776
AL139020.1|ENSG00000257275|antisense	2.0416	5.93297	0.000325989	0.00206817
LINC00581|ENSG00000280989|lincRNA	3.3701	0.554648	0.000326085	0.00206817
AC009152.1|ENSG00000275927|sense_intronic	2.24665	0.319758	0.000334281	0.0021174
AC020892.1|ENSG00000259241|lincRNA	2.42226	0.164207	0.000336352	0.00212714
LINC02195|ENSG00000236481|lincRNA	2.3296	1.75736	0.00034683	0.00218273
MYLK-AS1|ENSG00000239523|antisense	2.08641	4.51819	0.00035803	0.00224597
AC084768.1|ENSG00000254007|lincRNA	2.27922	5.59674	0.000359132	0.00225144
DDC-AS1|ENSG00000226122|antisense	2.19929	6.38834	0.000368989	0.00230878
PRKG1-AS1|ENSG00000236671|antisense	2.92933	1.63806	0.000369727	0.00231155
AL713998.1|ENSG00000227706|lincRNA	4.2869	2.18267	0.000370842	0.00231592
AL591030.2|ENSG00000280511|lincRNA	2.92273	0.175596	0.00037674	0.00234975
AL033381.1|ENSG00000176515|lincRNA	3.53946	1.27138	0.000381077	0.00236772
AC007848.1|ENSG00000255983|lincRNA	2.7008	1.34648	0.000382997	0.00237663
AC133644.2|ENSG00000273445|antisense	2.77864	3.13699	0.000383626	0.00237902
AC016737.1|ENSG00000271151|lincRNA	2.29833	2.93635	0.000385844	0.00239126
AC099792.1|ENSG00000231252|lincRNA	3.0796	2.24461	0.000387414	0.00239946
LINC00853|ENSG00000224805|antisense	2.15057	5.66422	0.000395038	0.00243894
SERTAD4-AS1|ENSG00000203706|antisense	2.68828	4.44359	0.000395629	0.00244105
LINC01559|ENSG00000180861|lincRNA	3.41773	4.97959	0.000399311	0.00246185
AC011773.4|ENSG00000260493|antisense	2.83532	1.21074	0.000399506	0.00246185
AC096711.1|ENSG00000249463|lincRNA	2.89971	1.60644	0.00040225	0.00246933
AC026740.1|ENSG00000271781|antisense	2.42731	5.00186	0.000402528	0.00246933
AC090337.1|ENSG00000264705|lincRNA	2.62514	1.16212	0.000402996	0.00246933
AC026336.3|ENSG00000276122|lincRNA	4.46402	2.80074	0.000409117	0.00249743
AC111000.4|ENSG00000250696|antisense	2.28002	6.71136	0.000410554	0.00250151
AL035446.1|ENSG00000234147|lincRNA	2.40647	4.68576	0.000417191	0.00253404
AC100803.3|ENSG00000271959|antisense	2.33576	3.33208	0.000424581	0.00256916
AC026992.2|ENSG00000261634|antisense	2.08836	2.50479	0.000432164	0.00260553
LINC00609|ENSG00000257585|lincRNA	2.14657	0.0920631	0.000437498	0.00263458
LINC01451|ENSG00000279141|lincRNA	2.96934	7.03047	0.000437523	0.00263458
AC109779.1|ENSG00000223930|lincRNA	3.32583	1.64856	0.000447449	0.00268277
AL133410.1|ENSG00000227388|lincRNA	2.14909	3.11566	0.000451677	0.00270148
U62317.1|ENSG00000226738|antisense	2.80363	2.09119	0.000455256	0.00271956
TCL6|ENSG00000187621|processed_transcript	2.97065	3.92372	0.000456213	0.00272157
AL583785.1|ENSG00000226197|lincRNA	2.58127	1.58077	0.000456718	0.00272163
AC084757.3|ENSG00000259705|lincRNA	2.56063	1.46318	0.000457472	0.0027228
AC024361.1|ENSG00000262410|sense_intronic	2.26015	3.69472	0.000459775	0.00273484
AL590652.1|ENSG00000227885|lincRNA	2.58572	2.13206	0.000468475	0.00277934
AL353803.2|ENSG00000230676|lincRNA	2.27061	1.25368	0.000468682	0.00277934
AC082651.1|ENSG00000240687|lincRNA	2.48506	0.915606	0.000472185	0.00279842
LINC00941|ENSG00000235884|lincRNA	2.68845	3.78664	0.000476594	0.00282283
AC091182.1|ENSG00000253123|processed_transcript	2.3033	4.33724	0.000477658	0.002824
AC010463.3|ENSG00000269815|sense_intronic	2.31962	1.65881	0.000481589	0.0028438
LINC01139|ENSG00000215808|lincRNA	3.4665	4.92941	0.000484122	0.00285529
TEX41|ENSG00000226674|lincRNA	2.90341	6.20701	0.00048971	0.00287955
AP006222.1|ENSG00000228463|lincRNA	2.31059	3.252	0.000490807	0.00288427
AC211486.5|ENSG00000277675|antisense	2.37149	0.327876	0.00049702	0.00291726
LINC01832|ENSG00000224231|lincRNA	2.00657	1.82598	0.000498259	0.00292278
PKP4-AS1|ENSG00000204380|antisense	2.05439	2.33133	0.000499528	0.00292495
AC069222.1|ENSG00000273374|lincRNA	2.04691	2.04042	0.000499968	0.00292577
AL645608.9|ENSG00000273443|lincRNA	2.68958	3.23935	0.000500522	0.00292726
AC138761.4|ENSG00000264956|lincRNA	3.44656	1.3993	0.000516472	0.00301152
LINC01520|ENSG00000230962|lincRNA	2.38942	6.02073	0.000522186	0.00303396
AL670729.1|ENSG00000231563|antisense	2.61287	1.73499	0.00053422	0.00309467
AC097478.3|ENSG00000276542|antisense	2.20789	0.581632	0.000536609	0.00310667
AC009987.1|ENSG00000231138|antisense	2.6597	5.90603	0.000537118	0.00310777
AC009121.2|ENSG00000263080|antisense	2.36031	2.20351	0.000544511	0.00314124
AL135934.1|ENSG00000254669|lincRNA	2.37967	7.17823	0.000551825	0.00317967
LINC01186|ENSG00000236751|lincRNA	2.58702	4.15199	0.000554221	0.0031882
AC010247.2|ENSG00000259436|antisense	2.89591	5.41056	0.000554284	0.0031882
AC008403.3|ENSG00000269814|lincRNA	2.64221	1.39836	0.000557253	0.00320338
LINC01021|ENSG00000250337|lincRNA	2.45272	5.75711	0.000558763	0.00321017
AL352977.2|ENSG00000258480|lincRNA	2.15526	0.980923	0.000562558	0.00322818
AC097717.1|ENSG00000232732|processed_transcript	2.58354	1.26433	0.00056406	0.00323299
AC008033.3|ENSG00000273824|lincRNA	2.86523	3.6126	0.000577077	0.00329792
AC090559.2|ENSG00000270072|sense_intronic	2.90911	0.63081	0.000584627	0.00332937
AC139722.1|ENSG00000251059|antisense	2.5465	0.339022	0.000590172	0.00335703
AC005165.1|ENSG00000223561|lincRNA	3.20907	4.22472	0.000591206	0.00336095
AC117569.1|ENSG00000264587|lincRNA	2.25811	0.952717	0.00059184	0.0033626
AL358072.1|ENSG00000271427|lincRNA	2.11249	2.19351	0.000596216	0.00338353
AC015574.1|ENSG00000275016|lincRNA	3.5269	1.00416	0.000600466	0.00340483
AC007406.2|ENSG00000255746|sense_intronic	2.26577	4.68031	0.000603297	0.00341379
AP001099.1|ENSG00000265728|lincRNA	3.07269	1.70163	0.000607545	0.00343583
KIZ-AS1|ENSG00000232712|antisense	2.00313	1.65315	0.000609198	0.00344318
LINC01436|ENSG00000231106|lincRNA	3.00573	5.14858	0.000625435	0.00352272
LINC01730|ENSG00000275491|lincRNA	2.10699	2.51718	0.000626677	0.00352361
AC145207.8|ENSG00000264769|antisense	2.47602	3.05356	0.000629153	0.00353457
AL139220.2|ENSG00000230615|lincRNA	2.14738	3.3246	0.000639324	0.00358852
ZIM2-AS1|ENSG00000269793|antisense	2.80296	3.0686	0.000646602	0.00362312
AC130456.3|ENSG00000260592|antisense	2.71916	2.29651	0.000647103	0.00362324
LINC00993|ENSG00000235687|lincRNA	3.33308	1.70378	0.000649165	0.00363123
C7orf71|ENSG00000222004|lincRNA	2.73978	0.994333	0.000668309	0.00372913
LINC00685|ENSG00000226179|antisense	2.17904	3.66883	0.000668577	0.00372913
AC008742.1|ENSG00000267650|antisense	2.43229	1.63898	0.000675047	0.00375878
AC012668.1|ENSG00000227981|lincRNA	2.29853	3.43058	0.000676065	0.00376015
AC109479.1|ENSG00000253163|lincRNA	2.10211	2.21294	0.000677555	0.00376629
AC124067.2|ENSG00000253414|sense_intronic	2.53309	2.3099	0.000679238	0.00376921
EPHA5-AS1|ENSG00000250846|lincRNA	3.39583	1.24865	0.000685151	0.00379771
AC097478.1|ENSG00000251095|antisense	3.23321	4.10194	0.000695235	0.00384923
AC006252.1|ENSG00000243224|antisense	2.10742	2.7063	0.000713999	0.00393526
AP002957.1|ENSG00000255345|lincRNA	3.39585	1.0613	0.000718617	0.00395848
LINC00484|ENSG00000229694|lincRNA	2.95347	1.50664	0.000728981	0.00401104
AL355073.1|ENSG00000259483|lincRNA	2.15254	6.40473	0.000743138	0.00407286
AL356364.1|ENSG00000238232|lincRNA	3.50305	1.32176	0.00074417	0.00407623
AP001205.1|ENSG00000253740|antisense	2.66624	0.247895	0.000749557	0.00410113
AC021683.2|ENSG00000267506|lincRNA	2.42768	1.51308	0.000760479	0.00414695
AC018814.1|ENSG00000225044|lincRNA	2.2245	0.604469	0.000766384	0.00417681
MELTF-AS1|ENSG00000228109|antisense	2.20952	5.2088	0.000771201	0.00419747
LINC01694|ENSG00000233922|lincRNA	2.64861	4.13247	0.000772472	0.00420061
AC015722.2|ENSG00000274312|lincRNA	2.13328	2.23067	0.000778087	0.00422644
AC090506.1|ENSG00000266196|lincRNA	2.25235	0.77591	0.000796597	0.00431019
MEOX2-AS1|ENSG00000229108|lincRNA	3.01297	3.05607	0.000799931	0.00432344
Z97192.2|ENSG00000213279|lincRNA	2.65934	4.16899	0.000817577	0.00440661
AL022341.2|ENSG00000262528|antisense	2.25483	1.3369	0.000826579	0.00444531
AL139412.1|ENSG00000236947|lincRNA	2.36865	4.39965	0.00083099	0.00446166
AP003419.4|ENSG00000275484|lincRNA	2.15219	2.93765	0.000840489	0.00450523
WFDC21P|ENSG00000261040|processed_transcript	2.86048	6.24432	0.000842012	0.00451091
AC141930.2|ENSG00000231482|lincRNA	2.00536	5.26607	0.000842702	0.00451213
BX649601.1|ENSG00000273473|lincRNA	2.03609	3.71707	0.000845312	0.00452053
LINC01413|ENSG00000260172|lincRNA	2.24368	0.604917	0.000845659	0.00452053
AC008750.3|ENSG00000267905|antisense	2.60326	2.13697	0.00086219	0.00459189
AL353801.3|ENSG00000273363|sense_intronic	2.09639	2.2746	0.000868204	0.00461576
AC021321.1|ENSG00000271966|lincRNA	2.13838	2.35257	0.000875054	0.00464459
AC079062.1|ENSG00000263711|processed_transcript	2.51331	6.16647	0.000887741	0.00470425
AL136162.1|ENSG00000271888|lincRNA	2.12759	3.70973	0.00089126	0.00472034
AL355987.4|ENSG00000273066|processed_transcript	2.42851	5.20321	0.000896689	0.00474395
AC005618.1|ENSG00000272070|lincRNA	2.28332	3.09527	0.000901109	0.00476217
LINC01047|ENSG00000232225|lincRNA	2.30685	0.112933	0.000912138	0.00481524
AC087525.1|ENSG00000259459|lincRNA	2.89195	1.38896	0.000915622	0.00483102
AC124254.1|ENSG00000264015|lincRNA	2.31217	4.58091	0.000941041	0.00494908
AC007036.1|ENSG00000227017|lincRNA	2.71595	1.71149	0.000941737	0.00495008
CCDC13-AS1|ENSG00000173811|antisense	2.25804	4.281	0.000947783	0.00497918
LINC01950|ENSG00000251027|lincRNA	3.35162	1.40321	0.000951967	0.00499847
ZNF341-AS1|ENSG00000230753|antisense	2.07415	2.08842	0.000982584	0.00514263
LINC01675|ENSG00000234142|lincRNA	2.49324	2.26415	0.000983774	0.0051461
LINC02041|ENSG00000228952|lincRNA	2.91734	3.16725	0.000990871	0.00517834
RNF157-AS1|ENSG00000267128|antisense	2.5178	4.76402	0.000995695	0.00519732
AL353807.2|ENSG00000232519|antisense	2.12308	1.37252	0.00101038	0.00525992
AL118505.1|ENSG00000278192|lincRNA	2.35543	3.11544	0.00101893	0.00529878
AC022146.2|ENSG00000271717|antisense	2.28759	1.12564	0.00103419	0.00536205
AC106820.2|ENSG00000259895|antisense	2.24738	1.81713	0.00103495	0.00536205
AC074033.2|ENSG00000241479|antisense	2.73318	0.919838	0.00104953	0.00542608
AL450468.2|ENSG00000261055|lincRNA	2.3311	0.707035	0.0010545	0.00544316
AC107398.3|ENSG00000260918|sense_overlapping	2.71705	1.68886	0.00105907	0.00546096
AL109954.1|ENSG00000260202|lincRNA	2.18661	5.8117	0.00109091	0.00560145
AC020978.2|ENSG00000259797|sense_intronic	2.18825	1.17827	0.00111604	0.00571845
AC009902.2|ENSG00000254027|antisense	2.43353	1.19263	0.00112101	0.0057409
AC110285.1|ENSG00000262223|lincRNA	2.1665	2.17017	0.00115136	0.00587478
LINC01426|ENSG00000234380|antisense	2.64794	6.59761	0.00118001	0.00600213
AC107463.2|ENSG00000248456|lincRNA	2.40057	0.41992	0.0011873	0.00603294
AL592071.1|ENSG00000273980|lincRNA	2.5495	1.09821	0.00120405	0.00610215
AL355803.1|ENSG00000237371|antisense	2.06892	2.29289	0.00122288	0.00618474
MIR7-3HG|ENSG00000176840|lincRNA	2.58215	1.92026	0.00122841	0.00620946
AC004816.1|ENSG00000259153|lincRNA	2.02436	4.60854	0.00123394	0.00623098
LINC01136|ENSG00000233791|lincRNA	2.23212	3.06842	0.00126618	0.00637071
AL450992.1|ENSG00000229021|antisense	2.31067	0.899825	0.00128066	0.00643363
VAC14-AS1|ENSG00000214353|antisense	2.48222	5.60396	0.00128455	0.00644986
ZSWIM8-AS1|ENSG00000272589|antisense	2.10237	0.966884	0.00129196	0.0064837
AC003986.3|ENSG00000236536|antisense	2.34897	0.398191	0.00133561	0.00665147
SMILR|ENSG00000255364|lincRNA	2.25788	2.82834	0.00138787	0.00689064
LINC01478|ENSG00000267337|lincRNA	2.12954	3.60174	0.00138895	0.00689252
DSCR9|ENSG00000230366|lincRNA	2.01446	1.89811	0.00142272	0.0070386
AL359881.2|ENSG00000270035|lincRNA	2.76442	1.76329	0.00142566	0.00704956
LINC01483|ENSG00000227517|lincRNA	2.62456	1.59619	0.00143551	0.0070911
AP000721.2|ENSG00000256824|antisense	2.47089	0.635239	0.00144665	0.0071317
AF127577.3|ENSG00000235277|antisense	3.59645	1.87261	0.00146252	0.00719538
DGCR9|ENSG00000273032|lincRNA	2.08801	4.13609	0.00147923	0.00725931
AC020571.1|ENSG00000229056|antisense	2.35513	3.3929	0.0014953	0.00733081
AC013275.1|ENSG00000231013|antisense	2.57434	6.14609	0.0015164	0.00742128
AC018695.6|ENSG00000275393|sense_intronic	2.36908	0.871715	0.00153153	0.00748209
AC016722.3|ENSG00000260977|lincRNA	2.02339	2.37139	0.00153881	0.00751394
LINC00376|ENSG00000227564|lincRNA	2.07936	0.892034	0.00156197	0.00761179
AL031705.1|ENSG00000260646|lincRNA	2.27041	1.15547	0.00157919	0.00767059
AC092794.2|ENSG00000275197|antisense	2.07651	0.905085	0.00158508	0.00768604
LINC01914|ENSG00000234362|lincRNA	2.04033	2.85959	0.00158614	0.00768736
AP001432.1|ENSG00000242553|lincRNA	2.08459	2.03565	0.00165987	0.00800668
AC005730.2|ENSG00000261033|antisense	2.89614	2.33234	0.00166023	0.00800668
AC023347.1|ENSG00000235774|lincRNA	2.92291	1.51778	0.00171835	0.00825726
AC112484.4|ENSG00000261159|lincRNA	2.12762	4.58846	0.00171896	0.00825726
LINC01281|ENSG00000235304|lincRNA	2.53624	1.01816	0.0017262	0.00828794
AL358176.1|ENSG00000224359|antisense	2.31293	1.87709	0.00173191	0.00831131
AC131532.1|ENSG00000258815|lincRNA	2.93563	2.09562	0.00175064	0.00838883
LINC00460|ENSG00000233532|lincRNA	3.21182	2.11584	0.0017585	0.00841406
AC092332.1|ENSG00000260064|sense_intronic	2.07359	3.25468	0.00179286	0.0085659
AC078850.1|ENSG00000248187|lincRNA	2.23539	1.62842	0.0018262	0.00869964
AC040174.2|ENSG00000269986|sense_intronic	3.06456	1.07217	0.00184165	0.00875186
AC009005.1|ENSG00000267751|antisense	2.04868	5.31281	0.00185887	0.00882513
AL121782.1|ENSG00000278153|lincRNA	2.02642	1.17396	0.00187423	0.00887737
LINC00607|ENSG00000235770|lincRNA	2.38337	5.64853	0.00189346	0.00895015
AL138924.1|ENSG00000280560|lincRNA	2.17821	1.01278	0.0019332	0.00911592
AL117350.1|ENSG00000237481|antisense	2.16093	1.50862	0.00196387	0.00923821
AL160408.1|ENSG00000228044|lincRNA	2.65536	3.08543	0.00196838	0.00925051
Z82188.2|ENSG00000235237|antisense	2.18627	1.18578	0.00200868	0.00938123
CASC16|ENSG00000249231|lincRNA	2.69533	1.24601	0.00201911	0.00942092
AP000757.2|ENSG00000254844|antisense	2.64211	3.39758	0.00202188	0.00942481
AC104534.1|ENSG00000268756|antisense	2.29123	4.51609	0.00203587	0.00947121
C1QTNF1-AS1|ENSG00000265096|antisense	2.48247	4.24437	0.00203668	0.00947121
LINC02125|ENSG00000250514|lincRNA	3.10962	1.2333	0.0021288	0.00983398
AC124944.3|ENSG00000273009|lincRNA	2.01035	1.48626	0.00218595	0.0100551
AC024941.2|ENSG00000281333|antisense	2.04545	1.62755	0.00220636	0.01013
AP003355.2|ENSG00000272321|antisense	2.99756	1.47417	0.00221417	0.0101567
SLC12A9-AS1|ENSG00000236305|antisense	2.03746	2.93488	0.00222413	0.0101924
AL592424.1|ENSG00000261168|sense_overlapping	2.08935	4.73228	0.0023343	0.0106463
AC107886.1|ENSG00000255372|antisense	2.14788	0.552549	0.00237105	0.0107645
AL161756.2|ENSG00000258809|lincRNA	2.18473	0.872508	0.00237972	0.0107839
AC096734.1|ENSG00000251517|lincRNA	2.26631	1.11581	0.00244218	0.0110209
LHFPL3-AS1|ENSG00000226869|processed_transcript	2.95662	1.11273	0.00248822	0.0111924
AC012313.4|ENSG00000268307|lincRNA	2.42343	1.07243	0.00250254	0.0112315
AC012236.1|ENSG00000259772|lincRNA	2.30724	5.79887	0.00250852	0.0112526
LINC01204|ENSG00000229563|lincRNA	2.09532	0.743638	0.00253081	0.0113435
AL365181.4|ENSG00000272971|lincRNA	2.96166	1.3473	0.00254518	0.0113938
AC011603.2|ENSG00000257913|antisense	2.00999	2.82062	0.00254775	0.0113938
AC005696.4|ENSG00000277200|lincRNA	2.2268	1.54944	0.00256352	0.011452
AC148476.1|ENSG00000274373|lincRNA	2.35725	3.11299	0.00264632	0.011768
TSPEAR-AS1|ENSG00000235890|antisense	2.30801	6.16462	0.00265569	0.0117989
AL355607.1|ENSG00000228216|lincRNA	2.19534	1.68129	0.00268546	0.0119203
LINC00336|ENSG00000197251|lincRNA	2.85605	1.0721	0.00275759	0.0121575
AL451069.1|ENSG00000226900|lincRNA	2.33099	2.49744	0.0029508	0.0128469
AL360091.1|ENSG00000229832|sense_intronic	2.12275	1.25541	0.00296739	0.0128961
AC124067.4|ENSG00000254290|lincRNA	2.52862	4.89228	0.00303121	0.0131325
AC007750.1|ENSG00000236841|antisense	2.13465	1.77008	0.0031041	0.0134067
AC018521.7|ENSG00000266821|lincRNA	2.28002	0.918883	0.00322935	0.0138011
AL354953.1|ENSG00000224468|antisense	2.03288	1.80908	0.00338753	0.0143576
LINC02087|ENSG00000237057|lincRNA	3.07101	0.98291	0.00351006	0.0147999
AC006213.3|ENSG00000267191|antisense	2.13003	2.87911	0.00351837	0.0148276
AC114912.1|ENSG00000249645|lincRNA	2.68505	1.37546	0.00352572	0.0148467
AC005537.1|ENSG00000232006|lincRNA	2.67531	2.40773	0.00353834	0.0148805
AC104971.4|ENSG00000275418|lincRNA	2.57879	2.68613	0.00354217	0.0148902
FARSA-AS1|ENSG00000266975|antisense	2.12424	1.19672	0.00356754	0.0149646
AP001505.1|ENSG00000261706|lincRNA	2.86344	0.806228	0.00358122	0.0150027
LINC00880|ENSG00000243629|lincRNA	2.12258	4.18725	0.0036284	0.0151613
AC006205.2|ENSG00000256020|sense_intronic	2.59832	7.34263	0.00364151	0.0152096
ERVH48-1|ENSG00000233056|lincRNA	2.35513	3.82595	0.00374947	0.0155938
FAM225B|ENSG00000225684|lincRNA	2.18256	1.74634	0.00386301	0.0159834
GDNF-AS1|ENSG00000248587|antisense	2.35067	4.76667	0.00387061	0.015989
AC026992.1|ENSG00000259504|lincRNA	2.00839	1.14356	0.0038722	0.015989
AP001476.1|ENSG00000224413|lincRNA	2.52323	2.40164	0.00387235	0.015989
AC022034.2|ENSG00000237807|lincRNA	2.12854	4.38071	0.00402369	0.0164814
LINC00839|ENSG00000185904|lincRNA	2.0997	4.76166	0.00402704	0.0164882
AC100807.1|ENSG00000253783|lincRNA	2.57881	4.57718	0.00415024	0.0169054
AL590369.1|ENSG00000234789|antisense	2.02917	0.961765	0.00418626	0.0170328
AC239868.2|ENSG00000261716|sense_overlapping	2.27429	7.77216	0.00425556	0.0172789
LINC00837|ENSG00000235824|lincRNA	2.4224	0.41952	0.0042805	0.0173585
AC026355.2|ENSG00000236385|lincRNA	2.14036	4.89604	0.00434482	0.0175901
FOXD2-AS1|ENSG00000237424|antisense	2.1554	7.06265	0.0043876	0.0177486
AC111149.2|ENSG00000253339|lincRNA	2.3636	4.57173	0.00451682	0.0182034
AC025580.1|ENSG00000259342|antisense	2.26452	2.10683	0.00457045	0.0183367
AL512413.1|ENSG00000272088|lincRNA	2.15428	1.8413	0.00475449	0.0189578
AC007966.1|ENSG00000226747|antisense	2.06598	2.2487	0.00476015	0.0189726
LINC02137|ENSG00000260186|lincRNA	2.73142	1.89191	0.00481371	0.0191626
AC090774.4|ENSG00000266369|antisense	2.09779	1.33216	0.00508473	0.020094
AC211433.1|ENSG00000232729|processed_transcript	2.001	1.16351	0.00528227	0.0207653
LINC00668|ENSG00000265933|lincRNA	2.7019	4.07112	0.00532961	0.0209093
AL355488.2|ENSG00000273373|antisense	2.02751	6.53015	0.00557116	0.0217433
AC110285.2|ENSG00000262877|lincRNA	2.03149	6.33478	0.00573801	0.0222787
AL136528.1|ENSG00000227589|antisense	2.28335	3.16559	0.00583337	0.0225861
LINC00189|ENSG00000215533|sense_overlapping	2.08002	4.37554	0.00588291	0.0227598
GATA2-AS1|ENSG00000244300|antisense	2.01395	5.26322	0.00590435	0.0228247
AC010643.1|ENSG00000268686|antisense	2.14817	5.60699	0.00592642	0.0228828
AC007638.1|ENSG00000262079|lincRNA	2.00044	0.992117	0.00637127	0.024317
C20orf166-AS1|ENSG00000174403|antisense	2.21876	2.50029	0.00664695	0.0251476
AC068987.3|ENSG00000260473|lincRNA	2.05776	1.38744	0.00710001	0.0265835
AC027348.1|ENSG00000275155|sense_intronic	2.08575	0.990436	0.00725242	0.0270918
AC090503.1|ENSG00000257682|lincRNA	2.29425	0.982561	0.0073347	0.0273259
AL356310.1|ENSG00000228792|lincRNA	2.15965	2.03059	0.00742662	0.0275737
AP000688.2|ENSG00000233393|lincRNA	2.33391	2.28693	0.00751671	0.0278552
CASC9|ENSG00000249395|lincRNA	2.67266	6.8672	0.0075731	0.028011
AL049543.1|ENSG00000246350|antisense	2.12068	1.10828	0.00757946	0.0280133
LINC01014|ENSG00000223941|sense_intronic	2.66686	2.4311	0.00766043	0.0282911
AC092167.1|ENSG00000226965|lincRNA	2.18405	1.23212	0.00773205	0.0285017
LINC00184|ENSG00000224939|lincRNA	2.06071	1.11331	0.00778737	0.0286515
AL355472.4|ENSG00000273367|antisense	2.10343	1.34889	0.00792317	0.0290199
AL138720.1|ENSG00000234261|lincRNA	2.30153	1.2382	0.00817691	0.0297594
AL596330.1|ENSG00000229400|antisense	2.22003	1.99603	0.00841502	0.0304444
AC006157.1|ENSG00000278847|lincRNA	2.02711	1.69623	0.00857845	0.0309211
AC006058.3|ENSG00000272121|lincRNA	2.65326	1.40143	0.00864948	0.0311311
LINC01358|ENSG00000237352|lincRNA	2.02177	1.99259	0.00944737	0.0334722
AC147651.1|ENSG00000229380|antisense	2.59502	4.20894	0.00989597	0.0347838
AC138466.1|ENSG00000256312|lincRNA	2.35382	1.14229	0.0104025	0.0361734
AC134312.4|ENSG00000261193|lincRNA	2.12005	1.15209	0.0105414	0.0365783
LINC01954|ENSG00000271952|lincRNA	2.01447	1.50163	0.010656	0.0368929
AC006372.1|ENSG00000223872|lincRNA	2.2492	1.13857	0.0113161	0.0386346
AL138767.1|ENSG00000196566|antisense	2.32725	0.980933	0.0116045	0.0394369
CHL1-AS2|ENSG00000224318|processed_transcript	2.53002	1.95707	0.0122588	0.0409929
LHFPL3-AS2|ENSG00000225329|processed_transcript	2.1614	5.14253	0.0125022	0.0416215
AL049646.1|ENSG00000230010|lincRNA	2.32914	1.02543	0.0126988	0.0422039
SLC5A4-AS1|ENSG00000242082|antisense	2.0223	1.28014	0.0127462	0.0423122
AC018695.2|ENSG00000269898|antisense	2.28645	0.741882	0.0130245	0.0429405
SLC9A3-AS1|ENSG00000225138|processed_transcript	2.10152	8.76986	0.0135536	0.0443323
LINC01700|ENSG00000232837|lincRNA	2.02962	0.503987	0.0141034	0.0456291
AC008659.1|ENSG00000245688|sense_intronic	2.25754	1.2292	0.0141595	0.0457196
LINC02211|ENSG00000245662|lincRNA	2.20266	2.12612	0.0144802	0.0465551
LINC00967|ENSG00000253138|lincRNA	2.0354	1.9224	0.014501	0.0466066
TBX5-AS1|ENSG00000255399|antisense	2.52365	1.23115	0.0145419	0.046692
AC040174.1|ENSG00000261502|processed_transcript	2.33193	1.84319	0.014659	0.0469946
