# Supplementary material for: 15-lncRNA-Based Classifier-Clinicopathologic Nomogram Improves the Prediction of Recurrence in Patients with Hepatocellular Carcinoma
Source: Dis Markers. 2020 Dec 1;2020:9180732. doi: 10.1155/2020/9180732 (PMC7817238; doi:10.1155/2020/9180732)
Supplement: Supplementary 2 — Using univariable Cox regression analysis, we identified 31 prognostic related lncRNAs. [file 9180732.f2.xls]

## Sheet: supplementary material 2
lncRNAname	HR	P
AC068481.1.ENSG00000223884.antisense	1.52899	4.05e-05
AL121985.1.ENSG00000228863.antisense	1.18075	7.6e-05
AC118653.1.ENSG00000225818.lincRNA	1.39835	0.000173039
AC246785.3.ENSG00000237343.lincRNA	1.25001	0.000177413
LINC02429.ENSG00000251266.lincRNA	1.43119	0.000201027
AL352977.2.ENSG00000258480.lincRNA	1.38402	0.000267485
GACAT3.ENSG00000236289.lincRNA	1.42688	0.000291961
LINC00462.ENSG00000233610.lincRNA	1.32874	0.000882713
AC012625.1.ENSG00000251361.lincRNA	1.22101	0.00126713
AC010547.1.ENSG00000247324.antisense	1.18549	0.00134249
AC027458.1.ENSG00000260457.lincRNA	1.17032	0.00138186
FP325330.2.ENSG00000278890.lincRNA	1.39436	0.00147717
L34079.2.ENSG00000269177.antisense	1.20853	0.00150231
ARHGEF7.AS1.ENSG00000227352.antisense	1.2435	0.00157358
LINC01700.ENSG00000232837.lincRNA	1.44221	0.00164196
AP002478.1.ENSG00000266401.antisense	1.20678	0.0018874
AC007192.2.ENSG00000269145.antisense	1.45728	0.00285184
AL512604.2.ENSG00000233242.antisense	1.27794	0.00285671
AC105924.1.ENSG00000249877.lincRNA	1.35167	0.00301247
AC016994.1.ENSG00000227294.antisense	1.19701	0.00312064
AC092675.1.ENSG00000222000.antisense	1.27671	0.00339023
AC010406.1.ENSG00000250567.lincRNA	1.4461	0.00346264
AC009101.1.ENSG00000259859.lincRNA	1.38407	0.00352331
AC109779.1.ENSG00000223930.lincRNA	0.681123	0.0040095
AC007349.2.ENSG00000230831.antisense	1.35121	0.0040162
AC011481.1.ENSG00000267114.lincRNA	1.16811	0.00407458
AC106736.1.ENSG00000261260.lincRNA	1.32969	0.00412418
AC091939.1.ENSG00000254135.lincRNA	1.23597	0.00462877
AC093772.1.ENSG00000248491.lincRNA	1.20351	0.00495759
CAMTA1.IT1.ENSG00000237402.sense_intronic	1.31057	0.00527838
LINC02247.ENSG00000223729.lincRNA	1.09917	0.00535878
LINC01168.ENSG00000240707.lincRNA	1.15332	0.00541312
AP003696.1.ENSG00000253385.lincRNA	1.16541	0.0057385
AC113346.1.ENSG00000251144.lincRNA	1.21438	0.00582627
AC094104.2.ENSG00000251132.lincRNA	1.11822	0.00590299
LINC02419.ENSG00000256906.lincRNA	1.16293	0.00597259
AL596087.2.ENSG00000230898.sense_intronic	1.27449	0.00612794
AC066612.1.ENSG00000259235.lincRNA	1.1397	0.00630453
AC126768.2.ENSG00000248994.lincRNA	1.30634	0.0064505
AL591501.1.ENSG00000233928.lincRNA	1.2778	0.00667787
AC005342.1.ENSG00000203593.antisense	1.1513	0.00694294
LINC01189.ENSG00000232827.lincRNA	1.15068	0.00827259
LINC01047.ENSG00000232225.lincRNA	1.6738	0.00911225
AL138799.4.ENSG00000234953.antisense	1.1268	0.00912463
PLCE1.AS1.ENSG00000268894.antisense	0.745275	0.00913166
LINC01198.ENSG00000231817.lincRNA	1.56302	0.00950385
AL162377.1.ENSG00000231856.antisense	0.873045	0.00983001
LINC02238.ENSG00000223479.lincRNA	1.37992	0.00997795
MIR137HG.ENSG00000225206.lincRNA	1.1423	0.0112992
AC018692.1.ENSG00000279321.lincRNA	1.19186	0.0114187
AC105243.1.ENSG00000261780.processed_transcript	1.11881	0.0115605
AC098864.1.ENSG00000177822.antisense	1.18011	0.0116406
AC023983.2.ENSG00000273321.lincRNA	1.11725	0.0118553
AC015712.7.ENSG00000278456.antisense	1.19344	0.0119346
AL109910.2.ENSG00000271820.lincRNA	1.16396	0.0126693
AL591686.1.ENSG00000224525.antisense	1.30516	0.0128339
LINC01122.ENSG00000233723.lincRNA	1.10964	0.0131554
LINC01090.ENSG00000231689.lincRNA	1.26636	0.0134481
LINC02360.ENSG00000248300.lincRNA	1.19557	0.0138135
LINC02252.ENSG00000261304.lincRNA	1.26847	0.0138518
AC011453.1.ENSG00000269842.lincRNA	1.13436	0.0139489
AC007402.1.ENSG00000231918.lincRNA	1.26613	0.0140168
AL136141.1.ENSG00000270755.lincRNA	1.12794	0.0142254
CDRT7.ENSG00000259944.lincRNA	1.25787	0.0142495
AC008659.1.ENSG00000245688.sense_intronic	0.697901	0.0147791
AC003092.1.ENSG00000236453.lincRNA	1.22031	0.0152883
AC023830.3.ENSG00000278434.sense_intronic	1.17001	0.0158194
AC116914.1.ENSG00000262358.antisense	1.19716	0.0161924
AC015722.2.ENSG00000274312.lincRNA	1.16458	0.0162488
MCHR2.AS1.ENSG00000229315.antisense	1.37048	0.0163156
AL390856.1.ENSG00000232309.lincRNA	1.11403	0.0164063
AC117386.2.ENSG00000243944.antisense	1.14466	0.017243
AC024614.2.ENSG00000265689.lincRNA	1.17932	0.017435
AC082651.4.ENSG00000244260.lincRNA	1.09469	0.0183106
AL353801.2.ENSG00000234504.antisense	1.09066	0.018576
LINC01517.ENSG00000232624.processed_transcript	1.30282	0.0193487
AL139327.2.ENSG00000232243.lincRNA	1.19569	0.0196926
AP003086.2.ENSG00000254420.antisense	1.1501	0.0198468
AL133387.3.ENSG00000230967.lincRNA	1.11356	0.0200844
AC012213.4.ENSG00000271830.lincRNA	1.14684	0.0213203
AC005828.3.ENSG00000263644.antisense	1.18174	0.021626
AL022725.1.ENSG00000236336.antisense	1.24636	0.0218168
LIN28B.AS1.ENSG00000203809.lincRNA	1.09117	0.0218249
AL117378.1.ENSG00000236673.lincRNA	1.09337	0.0218548
AC104984.5.ENSG00000266919.sense_intronic	1.08672	0.0219256
AC020978.2.ENSG00000259797.sense_intronic	1.24372	0.0224111
AC082651.1.ENSG00000240687.lincRNA	1.19426	0.0228446
LINC00620.ENSG00000224514.antisense	1.07678	0.0228943
ANKRD34C.AS1.ENSG00000259234.lincRNA	1.10045	0.0233491
AC007557.1.ENSG00000227021.lincRNA	1.12697	0.0243549
AL031779.1.ENSG00000227602.sense_intronic	1.28198	0.0244522
CU634019.2.ENSG00000278884.lincRNA	1.28301	0.0251358
AC008080.2.ENSG00000227481.antisense	1.0872	0.0252537
AC126773.1.ENSG00000260084.antisense	1.13214	0.0255006
AL032819.1.ENSG00000260132.antisense	1.07198	0.0260887
HOXC.AS1.ENSG00000250451.antisense	1.15523	0.0261718
AC007255.1.ENSG00000223813.antisense	0.835904	0.0262154
AC060234.2.ENSG00000233665.processed_transcript	1.12686	0.0279484
ARHGEF3.AS1.ENSG00000240198.antisense	1.09497	0.0281673
AJ011931.1.ENSG00000276633.sense_intronic	1.21191	0.0282833
AC124067.1.ENSG00000253388.lincRNA	1.15055	0.0294378
AC027343.2.ENSG00000249865.antisense	1.17997	0.030119
LINC01855.ENSG00000267517.lincRNA	1.58555	0.0306898
LINC00392.ENSG00000228295.lincRNA	1.16793	0.0327851
AL590483.1.ENSG00000229960.lincRNA	1.21287	0.0328349
Z99756.1.ENSG00000203527.antisense	1.13055	0.0330073
U47924.1.ENSG00000271969.antisense	1.22172	0.0338826
LINC01362.ENSG00000230817.lincRNA	1.10461	0.0358092
AL807757.2.ENSG00000236095.sense_intronic	1.09531	0.0361478
AC015712.6.ENSG00000272808.processed_transcript	1.09254	0.0371079
AC092120.2.ENSG00000261692.sense_intronic	1.08061	0.0376285
AP003419.3.ENSG00000274251.lincRNA	0.825753	0.0377991
AL357568.2.ENSG00000271917.sense_intronic	1.12095	0.0382425
AC009152.1.ENSG00000275927.sense_intronic	1.3558	0.0392031
LINC01297.ENSG00000274827.lincRNA	1.13096	0.0401249
AC097381.1.ENSG00000228919.lincRNA	1.11581	0.0401485
AL365204.2.ENSG00000237414.lincRNA	1.16889	0.0411645
AC007966.1.ENSG00000226747.antisense	0.86864	0.0415837
AC003986.3.ENSG00000236536.antisense	1.31396	0.0417434
AL390816.2.ENSG00000258903.lincRNA	1.08053	0.0417609
AC130456.5.ENSG00000260934.antisense	1.08481	0.0421145
LINC00494.ENSG00000235621.lincRNA	1.10029	0.042689
AC005220.1.ENSG00000236352.antisense	1.11759	0.0427022
AL031429.2.ENSG00000269933.sense_intronic	1.07741	0.0430152
AC079061.1.ENSG00000248050.antisense	0.916497	0.0431719
AC023421.1.ENSG00000266968.sense_intronic	1.07071	0.0441084
AC092634.5.ENSG00000236299.lincRNA	1.07449	0.0451704
AL356310.1.ENSG00000228792.lincRNA	0.844059	0.04616
LINC01151.ENSG00000253819.lincRNA	0.911875	0.0464157
AL078590.1.ENSG00000229722.lincRNA	1.16018	0.046874
PLA2G4C.AS1.ENSG00000269420.antisense	1.12738	0.0471644
AL445434.1.ENSG00000230269.lincRNA	1.11012	0.0477436
AC106801.1.ENSG00000253519.antisense	1.14081	0.0504699
AC015936.1.ENSG00000267334.lincRNA	1.09369	0.0509893
AL357033.1.ENSG00000167046.antisense	1.12911	0.0510338
AC084756.1.ENSG00000259684.antisense	1.08349	0.0510639
AC092674.1.ENSG00000249036.lincRNA	1.18289	0.0511898
AC060814.6.ENSG00000280881.lincRNA	1.28395	0.0511984
AC018946.1.ENSG00000259177.antisense	1.08936	0.0513842
C9orf170.ENSG00000204446.lincRNA	1.06687	0.0520593
AL365500.1.ENSG00000227313.lincRNA	1.21422	0.0536264
AC092447.5.ENSG00000233288.lincRNA	1.0785	0.054004
AC083864.2.ENSG00000232930.lincRNA	1.12408	0.0542448
AC084346.1.ENSG00000254057.lincRNA	1.07463	0.0545067
LINC01386.ENSG00000251324.antisense	1.07909	0.055549
LINC02008.ENSG00000239440.lincRNA	1.27439	0.0561303
AL512407.1.ENSG00000228777.lincRNA	1.07462	0.056305
AC091153.4.ENSG00000261898.antisense	1.06765	0.0571684
SMILR.ENSG00000255364.lincRNA	0.896059	0.0574098
AC018695.2.ENSG00000269898.antisense	0.737704	0.0615453
AC006960.2.ENSG00000237400.antisense	1.38441	0.0627223
AC105390.1.ENSG00000250192.lincRNA	1.1682	0.0636564
AC017002.3.ENSG00000240350.lincRNA	0.882819	0.0637201
AL079303.2.ENSG00000258661.antisense	1.07392	0.0638192
TMEM132D.AS1.ENSG00000249196.antisense	1.12071	0.0651578
CAPN10.AS1.ENSG00000260942.antisense	1.12926	0.0654497
AC004540.2.ENSG00000225792.antisense	0.920553	0.0657452
AC073359.1.ENSG00000243953.lincRNA	1.37282	0.0661065
AP001007.2.ENSG00000255475.lincRNA	1.25591	0.0662086
AL160413.1.ENSG00000275923.lincRNA	1.06007	0.0665528
AC010907.2.ENSG00000237370.antisense	0.868156	0.0667278
AC018814.1.ENSG00000225044.lincRNA	1.25893	0.0669992
AC005722.2.ENSG00000262681.lincRNA	1.096	0.0685809
LINC01520.ENSG00000230962.lincRNA	1.05991	0.0689949
AC009955.2.ENSG00000267919.lincRNA	1.16247	0.0691517
AP003472.2.ENSG00000253842.lincRNA	1.24533	0.0692127
AP003062.1.ENSG00000255327.lincRNA	1.14475	0.0702608
AC079414.1.ENSG00000261540.antisense	1.18591	0.0723174
AC009097.3.ENSG00000260612.lincRNA	1.17784	0.0724603
AC108136.1.ENSG00000255325.lincRNA	0.905895	0.0728393
LINC01832.ENSG00000224231.lincRNA	1.12967	0.0739159
AC138028.3.ENSG00000259813.antisense	1.14289	0.0742474
AP003170.4.ENSG00000256603.antisense	1.10386	0.0751479
AC090673.2.ENSG00000256083.antisense	1.20365	0.0758459
AC073389.2.ENSG00000271848.antisense	1.10876	0.0759333
AC079298.3.ENSG00000280241.antisense	1.18869	0.0759957
AC003985.1.ENSG00000233824.lincRNA	0.887411	0.0762798
AC106864.2.ENSG00000250046.lincRNA	1.1339	0.0764604
AC092168.2.ENSG00000232034.sense_intronic	1.06547	0.0783601
AC013733.2.ENSG00000234595.antisense	1.05158	0.0794147
LINC00184.ENSG00000224939.lincRNA	0.835393	0.0794598
AL359643.2.ENSG00000271978.lincRNA	0.933981	0.0800674
AL645939.5.ENSG00000272236.lincRNA	0.886672	0.0810206
AC006058.3.ENSG00000272121.lincRNA	1.17024	0.0811245
LINC01384.ENSG00000237396.lincRNA	1.35882	0.0813188
AC087392.1.ENSG00000262003.antisense	0.921305	0.0834947
AC079031.2.ENSG00000256875.lincRNA	1.27199	0.0847049
LINC01338.ENSG00000281327.lincRNA	0.834978	0.0853765
AC011595.3.ENSG00000257890.lincRNA	1.11072	0.0861152
AL161785.2.ENSG00000235007.lincRNA	1.12212	0.086623
AL135934.1.ENSG00000254669.lincRNA	1.04827	0.0874838
LINC02253.ENSG00000259485.lincRNA	0.831824	0.0880384
AC011474.2.ENSG00000266248.antisense	1.09699	0.088701
AL162725.2.ENSG00000237153.lincRNA	1.365	0.0887636
AC051618.1.ENSG00000236958.sense_intronic	1.08526	0.0900011
LINC01022.ENSG00000232715.antisense	0.765921	0.0909365
AL356364.1.ENSG00000238232.lincRNA	1.15335	0.0909807
AL121832.3.ENSG00000275437.sense_intronic	1.11617	0.0919548
AL451069.1.ENSG00000226900.lincRNA	0.861352	0.0935827
LINC01074.ENSG00000227611.lincRNA	1.0775	0.0941227
AC006237.1.ENSG00000271392.sense_intronic	1.06015	0.0942887
AC005165.1.ENSG00000223561.lincRNA	0.904412	0.0946148
AC079239.1.ENSG00000248215.lincRNA	1.16304	0.0949549
LINC00907.ENSG00000267586.lincRNA	0.911212	0.0979056
AL139002.1.ENSG00000233379.lincRNA	1.12133	0.0980975
LINC01983.ENSG00000223783.lincRNA	1.05262	0.100497
FAM74A1.ENSG00000215112.lincRNA	1.06569	0.100878
AC005329.3.ENSG00000280486.antisense	0.848935	0.101576
AC016550.2.ENSG00000248363.lincRNA	0.905422	0.101955
LINC00276.ENSG00000230448.lincRNA	1.05256	0.101999
AL365181.4.ENSG00000272971.lincRNA	0.765965	0.102449
AL160408.1.ENSG00000228044.lincRNA	0.904777	0.102822
AL133467.4.ENSG00000270038.lincRNA	1.08378	0.103207
AC008103.1.ENSG00000279987.sense_intronic	1.05694	0.103977
AC034213.1.ENSG00000250509.lincRNA	0.89223	0.104003
LINC00479.ENSG00000236384.lincRNA	0.926202	0.104133
PHACTR2.AS1.ENSG00000235740.antisense	1.26971	0.104603
LINC00895.ENSG00000281548.lincRNA	0.870761	0.105127
LINC01445.ENSG00000231427.lincRNA	1.11089	0.105573
AC026523.1.ENSG00000259582.lincRNA	0.846769	0.106064
AC027130.1.ENSG00000261195.antisense	1.17452	0.106283
FENDRR.ENSG00000268388.lincRNA	0.899187	0.106348
TRPC7.AS1.ENSG00000248211.antisense	1.11589	0.108202
MLIP.IT1.ENSG00000236996.sense_intronic	1.07447	0.108848
AC009039.1.ENSG00000261470.antisense	1.1965	0.109031
AC090200.1.ENSG00000254357.antisense	1.19898	0.109576
GS1.279B7.1.ENSG00000261024.lincRNA	1.04691	0.109941
AC034229.4.ENSG00000272417.lincRNA	1.10967	0.111088
LINC01943.ENSG00000280721.lincRNA	0.929588	0.111492
AC113391.1.ENSG00000248484.lincRNA	1.13238	0.111936
LRP4.AS1.ENSG00000247675.antisense	1.10322	0.112851
AL445426.1.ENSG00000231246.lincRNA	1.0621	0.11321
AC012309.2.ENSG00000267437.antisense	1.0685	0.114562
AP003355.2.ENSG00000272321.antisense	0.825028	0.115484
AC246817.1.ENSG00000253853.lincRNA	1.05915	0.115491
AL359815.1.ENSG00000233431.antisense	0.877591	0.116034
AC003985.2.ENSG00000260951.lincRNA	0.887203	0.116129
AL136129.1.ENSG00000261039.lincRNA	1.11247	0.117419
AC109830.1.ENSG00000251199.lincRNA	1.11486	0.118338
AC012640.1.ENSG00000248968.antisense	1.13089	0.119428
AL358452.1.ENSG00000229242.antisense	1.06668	0.120757
AC090506.1.ENSG00000266196.lincRNA	1.21034	0.121497
MIR9.3HG.ENSG00000255571.lincRNA	0.945477	0.122136
AC068987.1.ENSG00000259887.lincRNA	0.920572	0.122969
AC032011.1.ENSG00000274340.lincRNA	1.10832	0.123166
AC084768.1.ENSG00000254007.lincRNA	1.05433	0.123931
AC104791.1.ENSG00000251687.antisense	1.13602	0.124085
AL360091.1.ENSG00000229832.sense_intronic	0.888904	0.124442
AC008892.1.ENSG00000249236.lincRNA	1.12615	0.124654
AL590399.3.ENSG00000231212.lincRNA	1.15224	0.124957
AC000067.1.ENSG00000225007.lincRNA	1.14234	0.125346
C1QTNF1.AS1.ENSG00000265096.antisense	0.918507	0.126915
AC091133.1.ENSG00000230532.antisense	1.12438	0.127072
CASC22.ENSG00000260887.lincRNA	0.883491	0.127238
AL133368.2.ENSG00000258693.lincRNA	1.34573	0.128486
AC099508.2.ENSG00000261058.lincRNA	0.934262	0.129304
AC021393.1.ENSG00000254775.lincRNA	0.0686767	0.131678
LINC01478.ENSG00000267337.lincRNA	1.07959	0.131707
AC020637.1.ENSG00000258231.lincRNA	1.13892	0.132152
AC005730.2.ENSG00000261033.antisense	0.872539	0.132304
LINC00383.ENSG00000237534.lincRNA	0.888158	0.132626
CASC16.ENSG00000249231.lincRNA	0.850016	0.133073
AC074327.1.ENSG00000228651.antisense	0.95044	0.133289
AC010280.2.ENSG00000248884.lincRNA	0.932106	0.134072
AC113331.1.ENSG00000236897.lincRNA	1.3283	0.13454
LINC01754.ENSG00000224565.lincRNA	0.888791	0.135191
AC116614.1.ENSG00000235688.antisense	1.12707	0.135848
AC124276.1.ENSG00000254486.lincRNA	1.06499	0.137609
AC099566.1.ENSG00000237435.lincRNA	1.04927	0.13878
LINC01813.ENSG00000229805.lincRNA	1.06268	0.139663
AL008733.1.ENSG00000226286.antisense	1.11327	0.141351
LINC00160.ENSG00000230978.lincRNA	0.861617	0.141414
AC097515.1.ENSG00000248138.antisense	0.898807	0.141496
AC093810.1.ENSG00000249052.lincRNA	1.06973	0.142189
MRPL23.AS1.ENSG00000226416.antisense	1.08902	0.142465
AP000679.1.ENSG00000176984.antisense	1.12026	0.143078
AC026355.2.ENSG00000236385.lincRNA	1.05464	0.143638
AC245100.6.ENSG00000238107.lincRNA	0.936198	0.143804
TTLL10.AS1.ENSG00000205231.antisense	1.06562	0.144179
LINC01186.ENSG00000236751.lincRNA	0.937528	0.144568
LINC01179.ENSG00000249500.lincRNA	1.16992	0.146024
AC105118.1.ENSG00000253931.antisense	1.06848	0.146393
AL359258.1.ENSG00000238122.lincRNA	1.10074	0.146622
AC234781.1.ENSG00000224216.antisense	1.05985	0.148308
AC109309.1.ENSG00000224513.antisense	1.123	0.151025
DGCR9.ENSG00000273032.lincRNA	0.939742	0.151777
AC026495.1.ENSG00000258654.lincRNA	0.900314	0.152626
AC126696.3.ENSG00000260498.lincRNA	0.859049	0.152926
AC104041.1.ENSG00000259692.lincRNA	0.89003	0.154936
IGF2BP2.AS1.ENSG00000163915.antisense	0.922045	0.155519
TLR8.AS1.ENSG00000233338.antisense	1.11367	0.155833
AC023421.2.ENSG00000267193.antisense	1.13425	0.155869
AL360295.1.ENSG00000229913.antisense	1.10319	0.157205
AC025171.3.ENSG00000251131.antisense	1.11566	0.15789
AL161729.4.ENSG00000271659.antisense	1.10037	0.162203
LINC01954.ENSG00000271952.lincRNA	1.11177	0.162963
AL138831.1.ENSG00000230648.antisense	1.10674	0.165066
AC005725.1.ENSG00000264727.lincRNA	1.1136	0.165517
AC005381.1.ENSG00000267243.lincRNA	1.08203	0.165867
AC104072.1.ENSG00000260878.sense_overlapping	0.876055	0.16591
AC007128.2.ENSG00000272328.lincRNA	1.06748	0.167939
LINC01192.ENSG00000241369.lincRNA	0.905389	0.169481
LINC01093.ENSG00000249173.lincRNA	0.957969	0.169917
PTCHD1.AS.ENSG00000233067.lincRNA	0.885251	0.170032
LINC01234.ENSG00000249550.lincRNA	1.04749	0.170172
AC008403.3.ENSG00000269814.lincRNA	1.12253	0.170175
AC239803.1.ENSG00000215859.lincRNA	0.934325	0.171928
AC091917.2.ENSG00000248876.lincRNA	1.061	0.17207
AP003969.1.ENSG00000255233.lincRNA	1.06044	0.173256
AC068020.1.ENSG00000268955.lincRNA	1.08005	0.17379
AC024610.2.ENSG00000279668.lincRNA	1.07448	0.174484
AC007277.1.ENSG00000213981.antisense	0.927079	0.177428
BBOX1.AS1.ENSG00000254560.antisense	1.06986	0.17759
AC012213.1.ENSG00000253477.antisense	1.14538	0.178145
BX119904.2.ENSG00000230159.lincRNA	1.10821	0.178313
LINC01389.ENSG00000225762.antisense	0.935525	0.179647
AL136528.1.ENSG00000227589.antisense	0.921739	0.180508
LINC01014.ENSG00000223941.sense_intronic	0.869595	0.181317
AC104971.4.ENSG00000275418.lincRNA	0.903013	0.18135
AL109615.2.ENSG00000231881.lincRNA	1.0967	0.181437
Z82188.2.ENSG00000235237.antisense	0.896728	0.183581
AC092167.1.ENSG00000226965.lincRNA	0.894959	0.184323
LINC01593.ENSG00000231221.lincRNA	1.08821	0.184967
HTR2A.AS1.ENSG00000224517.antisense	0.866084	0.185995
AC073174.1.ENSG00000227121.lincRNA	0.893723	0.186025
LINC01036.ENSG00000236030.lincRNA	1.14283	0.186301
AC100791.2.ENSG00000262768.antisense	1.08121	0.187973
AC068675.1.ENSG00000267747.antisense	0.867393	0.189175
AC084866.2.ENSG00000251200.antisense	1.04997	0.190787
AP000997.1.ENSG00000255599.lincRNA	0.902561	0.191484
AC006372.1.ENSG00000223872.lincRNA	0.772449	0.192323
AC092598.1.ENSG00000223523.sense_overlapping	0.915094	0.192552
AC079760.2.ENSG00000243144.lincRNA	0.917968	0.193826
GATA2.AS1.ENSG00000244300.antisense	0.952508	0.193906
ERICH3.AS1.ENSG00000234497.antisense	1.10967	0.194792
LINC01378.ENSG00000236922.lincRNA	1.07205	0.19508
HOXD.AS2.ENSG00000237380.antisense	1.06569	0.19569
AL390730.2.ENSG00000238022.antisense	1.05426	0.197117
MIR548XHG.ENSG00000224141.lincRNA	1.06135	0.197836
DDC.AS1.ENSG00000226122.antisense	1.04017	0.19795
GAPLINC.ENSG00000266835.lincRNA	0.944722	0.197997
LINC00237.ENSG00000225127.lincRNA	1.10838	0.19806
LINC01568.ENSG00000258779.lincRNA	0.463929	0.198165
LINC02293.ENSG00000257185.lincRNA	1.10725	0.199373
LINC02087.ENSG00000237057.lincRNA	0.851871	0.19981
LINC02335.ENSG00000278630.lincRNA	0.926389	0.20031
AL133325.3.ENSG00000278041.lincRNA	1.10561	0.203271
PICSAR.ENSG00000275874.lincRNA	1.0827	0.20333
LUCAT1.ENSG00000248323.lincRNA	0.945812	0.20394
AC015574.1.ENSG00000275016.lincRNA	1.11729	0.204277
LINC00853.ENSG00000224805.antisense	0.957963	0.205052
MEOX2.AS1.ENSG00000229108.lincRNA	0.92491	0.206067
U62317.1.ENSG00000226738.antisense	0.921449	0.207459
AL591686.2.ENSG00000272865.antisense	1.11338	0.209058
AC091230.1.ENSG00000261606.processed_transcript	0.820179	0.210904
AC012588.1.ENSG00000263677.lincRNA	0.756531	0.210925
AC078850.1.ENSG00000248187.lincRNA	0.909393	0.211321
AC062015.1.ENSG00000235070.lincRNA	0.911386	0.211795
AC090921.1.ENSG00000214803.lincRNA	1.09052	0.211918
AL353807.2.ENSG00000232519.antisense	0.901858	0.212195
AL365181.2.ENSG00000272068.lincRNA	0.960206	0.21292
AC111149.2.ENSG00000253339.lincRNA	0.948899	0.213817
AL365181.3.ENSG00000272405.antisense	0.968463	0.21434
AP006222.1.ENSG00000228463.lincRNA	0.938673	0.215924
AL031665.1.ENSG00000274269.processed_transcript	0.893538	0.216488
AC011294.1.ENSG00000233539.lincRNA	0.950952	0.216622
LINC00640.ENSG00000258479.lincRNA	1.0954	0.217114
AC006157.1.ENSG00000278847.lincRNA	0.918033	0.217333
AL139246.4.ENSG00000229393.antisense	0.896034	0.217787
AL122019.1.ENSG00000227579.lincRNA	0.916261	0.219203
AC144833.1.ENSG00000261426.sense_intronic	0.901388	0.220046
AL080284.1.ENSG00000224605.lincRNA	1.09297	0.220119
AC008543.4.ENSG00000267089.lincRNA	1.05961	0.221654
AC118755.1.ENSG00000262296.antisense	1.05617	0.222541
LINC00226.ENSG00000276210.lincRNA	1.13389	0.223175
AL358394.1.ENSG00000227683.lincRNA	0.872402	0.223805
AC083967.1.ENSG00000254337.lincRNA	1.1273	0.223849
LINC01891.ENSG00000231682.lincRNA	1.13469	0.224129
AC129492.4.ENSG00000266824.lincRNA	1.03772	0.226118
LINC00837.ENSG00000235824.lincRNA	1.14525	0.226883
AL132657.2.ENSG00000260137.lincRNA	1.10636	0.226935
AC010267.1.ENSG00000249150.lincRNA	0.832193	0.227468
LINC01863.ENSG00000253959.lincRNA	0.913448	0.228834
AL139020.1.ENSG00000257275.antisense	1.03832	0.231843
AC027348.1.ENSG00000275155.sense_intronic	0.870034	0.234059
AC110285.1.ENSG00000262223.lincRNA	0.930836	0.234548
AL161668.3.ENSG00000258604.lincRNA	0.962483	0.234779
KC877982.1.ENSG00000269993.lincRNA	1.11561	0.235151
LINC00880.ENSG00000243629.lincRNA	0.948186	0.235597
AL359551.1.ENSG00000231877.lincRNA	0.915828	0.235733
AC010643.1.ENSG00000268686.antisense	0.958594	0.237287
AL645608.3.ENSG00000230699.lincRNA	0.926843	0.238114
LINC02393.ENSG00000256597.lincRNA	1.17771	0.239379
AL606489.1.ENSG00000226330.antisense	0.951946	0.241072
AP001057.1.ENSG00000232124.antisense	1.05615	0.24298
AC016722.3.ENSG00000260977.lincRNA	1.07182	0.243258
LINC01231.ENSG00000236511.lincRNA	0.847604	0.244459
LINC01436.ENSG00000231106.lincRNA	0.950975	0.245674
AL161756.2.ENSG00000258809.lincRNA	1.1248	0.246179
LINC02469.ENSG00000248408.lincRNA	1.08422	0.246276
AC090707.1.ENSG00000254906.antisense	1.04072	0.246326
AC023389.1.ENSG00000263657.antisense	1.0718	0.246884
AC006004.1.ENSG00000236795.antisense	1.04682	0.246894
AL118511.2.ENSG00000225656.lincRNA	0.931052	0.24761
AL590666.2.ENSG00000229953.antisense	0.961844	0.24955
PKP4.AS1.ENSG00000204380.antisense	0.936081	0.249644
LINC01993.ENSG00000204277.lincRNA	1.08307	0.249831
AC084757.3.ENSG00000259705.lincRNA	0.916829	0.250092
MAFA.AS1.ENSG00000254338.antisense	1.05333	0.250188
AL713998.1.ENSG00000227706.lincRNA	0.892781	0.25022
AC021192.1.ENSG00000249171.lincRNA	1.03794	0.250584
AC024361.1.ENSG00000262410.sense_intronic	0.950431	0.250993
LINC01559.ENSG00000180861.lincRNA	0.927886	0.251523
AC073578.1.ENSG00000256209.lincRNA	1.0811	0.251578
ERVH48.1.ENSG00000233056.lincRNA	0.926594	0.254683
LINC01886.ENSG00000224568.lincRNA	1.07781	0.255462
LINC01413.ENSG00000260172.lincRNA	0.794412	0.256015
AP001596.1.ENSG00000232692.antisense	0.914406	0.256265
AL138828.1.ENSG00000237596.antisense	0.958166	0.256304
AP002505.1.ENSG00000267177.antisense	1.08042	0.256541
LINC02195.ENSG00000236481.lincRNA	0.922513	0.256687
LINC02149.ENSG00000248486.lincRNA	1.05731	0.256815
AC100827.4.ENSG00000260672.lincRNA	0.902241	0.257304
AL592182.1.ENSG00000233407.antisense	1.06211	0.258213
RNF157.AS1.ENSG00000267128.antisense	0.952566	0.259003
AL031587.2.ENSG00000233739.antisense	1.07936	0.259818
AC124254.1.ENSG00000264015.lincRNA	1.05136	0.260569
LINC02125.ENSG00000250514.lincRNA	1.08937	0.260893
LINC02454.ENSG00000256268.lincRNA	1.08271	0.261904
DEPDC1.AS1.ENSG00000234264.antisense	1.11218	0.262921
MIR200CHG.ENSG00000257084.lincRNA	1.1015	0.262961
HOXB.AS2.ENSG00000239552.antisense	1.07808	0.264242
Z99755.3.ENSG00000279184.antisense	1.06653	0.264649
AP001099.1.ENSG00000265728.lincRNA	0.882525	0.264861
LINC01477.ENSG00000261715.lincRNA	1.14083	0.265811
AC090503.1.ENSG00000257682.lincRNA	0.897564	0.265886
AC124067.4.ENSG00000254290.lincRNA	0.952352	0.267515
AC025154.2.ENSG00000257588.antisense	0.877453	0.268154
AC012236.1.ENSG00000259772.lincRNA	0.962174	0.26875
AC111000.4.ENSG00000250696.antisense	0.966774	0.26945
AC079075.2.ENSG00000259561.sense_intronic	1.04384	0.272942
AC006205.2.ENSG00000256020.sense_intronic	0.964773	0.274278
AC116366.2.ENSG00000238160.antisense	1.06221	0.27522
LINC00355.ENSG00000227674.lincRNA	1.04147	0.275824
AC138356.1.ENSG00000183154.antisense	0.942805	0.275865
AL138885.3.ENSG00000231056.lincRNA	0.697946	0.277648
AC087380.1.ENSG00000167355.processed_transcript	1.02972	0.27782
HOXC.AS2.ENSG00000250133.processed_transcript	1.07062	0.278066
LHFPL3.AS1.ENSG00000226869.processed_transcript	0.906627	0.278228
AC084365.1.ENSG00000257995.lincRNA	1.19123	0.278706
PVT1.ENSG00000249859.lincRNA	0.968024	0.27959
AP001505.1.ENSG00000261706.lincRNA	1.10522	0.281496
AF165147.1.ENSG00000232855.lincRNA	0.940121	0.281796
AL049543.1.ENSG00000246350.antisense	1.08954	0.28198
AL033381.2.ENSG00000270937.lincRNA	0.903457	0.282761
SRGAP3.AS4.ENSG00000235830.lincRNA	0.892668	0.283408
AC073111.1.ENSG00000239377.antisense	0.923532	0.283635
AC025265.3.ENSG00000257766.antisense	1.03958	0.284822
RNF144A.AS1.ENSG00000228203.processed_transcript	1.06404	0.28733
AL033381.1.ENSG00000176515.lincRNA	0.908997	0.287766
UPK1A.AS1.ENSG00000226510.antisense	1.06103	0.288316
LINC01164.ENSG00000189275.lincRNA	0.915739	0.288615
HOTTIP.ENSG00000243766.antisense	0.961171	0.288938
AC121338.1.ENSG00000205537.antisense	1.08843	0.289614
AC114912.1.ENSG00000249645.lincRNA	1.08886	0.290562
BX284668.6.ENSG00000272426.lincRNA	1.09259	0.291872
AL035045.1.ENSG00000233625.lincRNA	1.08943	0.292857
PTGES2.AS1.ENSG00000232850.lincRNA	0.944487	0.293536
KIAA1614.AS1.ENSG00000232586.antisense	0.928625	0.294505
AC080129.2.ENSG00000232874.antisense	0.945714	0.295733
AL358473.1.ENSG00000229191.antisense	1.1006	0.296483
AL591030.2.ENSG00000280511.lincRNA	1.12618	0.296655
SERTAD4.AS1.ENSG00000203706.antisense	0.95406	0.299422
AC010223.1.ENSG00000279028.antisense	1.06183	0.299524
AC113346.2.ENSG00000251670.lincRNA	0.883906	0.300811
AC147651.1.ENSG00000229380.antisense	1.05637	0.301417
AC022424.1.ENSG00000250579.antisense	1.04241	0.30301
LINC00645.ENSG00000258548.lincRNA	0.91353	0.303584
AL731897.1.ENSG00000228714.lincRNA	0.953198	0.303815
AC148476.1.ENSG00000274373.lincRNA	0.929982	0.30388
AC104134.1.ENSG00000225420.antisense	0.933024	0.304226
AC108463.2.ENSG00000230499.lincRNA	0.937681	0.304371
LINC00858.ENSG00000229404.lincRNA	0.917805	0.304599
HOXA.AS3.ENSG00000254369.antisense	1.06825	0.304906
AC008568.1.ENSG00000229855.lincRNA	0.845352	0.305104
AC091152.2.ENSG00000267160.antisense	1.02863	0.305211
LINC01426.ENSG00000234380.antisense	0.96931	0.305743
AC006557.1.ENSG00000267150.antisense	1.09837	0.306853
ELFN1.AS1.ENSG00000236081.lincRNA	1.04752	0.308365
AP001178.3.ENSG00000266456.antisense	0.93554	0.308694
AL162413.1.ENSG00000270372.lincRNA	1.05093	0.309697
Z97192.2.ENSG00000213279.lincRNA	0.951904	0.310615
AL356481.2.ENSG00000280474.sense_intronic	0.907614	0.310713
LINC01468.ENSG00000231131.lincRNA	0.910025	0.311947
AC108752.1.ENSG00000240241.lincRNA	1.06914	0.312338
AC145207.8.ENSG00000264769.antisense	0.945862	0.313186
AC105446.1.ENSG00000227053.antisense	1.06763	0.314782
AC011840.3.ENSG00000263860.lincRNA	1.16488	0.31738
AL139130.1.ENSG00000237390.lincRNA	0.930084	0.317479
AC107398.3.ENSG00000260918.sense_overlapping	1.07851	0.317518
AC005722.3.ENSG00000264785.antisense	0.906024	0.319898
FEZF1.AS1.ENSG00000230316.antisense	0.961835	0.320941
AC008938.1.ENSG00000260072.lincRNA	1.18059	0.321881
AC137810.1.ENSG00000248969.antisense	1.15823	0.322539
AC007750.1.ENSG00000236841.antisense	0.929578	0.322625
AC103808.3.ENSG00000265717.lincRNA	0.926229	0.323241
AC010735.1.ENSG00000261379.sense_intronic	0.938378	0.323389
AC027013.1.ENSG00000258489.lincRNA	1.04092	0.326507
AC064853.1.ENSG00000236116.sense_intronic	0.920263	0.326586
CCDC39.AS1.ENSG00000243187.antisense	1.0361	0.328512
AC009646.2.ENSG00000254687.antisense	1.15402	0.32964
LINC02041.ENSG00000228952.lincRNA	0.949021	0.329876
AP001972.4.ENSG00000255395.antisense	1.10396	0.330766
PKIA.AS1.ENSG00000254266.lincRNA	1.06096	0.331668
AL357060.1.ENSG00000230533.lincRNA	0.95145	0.331743
AC002351.1.ENSG00000258240.lincRNA	0.924237	0.331972
AC022034.2.ENSG00000237807.lincRNA	0.953927	0.334349
AL353803.2.ENSG00000230676.lincRNA	0.920305	0.334379
LINC01121.ENSG00000205054.processed_transcript	0.948704	0.335186
AC092115.3.ENSG00000262136.antisense	0.929066	0.335983
AC109479.1.ENSG00000253163.lincRNA	0.938381	0.338358
AL390778.2.ENSG00000233936.lincRNA	0.914905	0.338768
LINC01358.ENSG00000237352.lincRNA	0.929365	0.33985
AC005618.1.ENSG00000272070.lincRNA	0.952103	0.341219
AC117569.1.ENSG00000264587.lincRNA	1.09434	0.342892
GDNF.AS1.ENSG00000248587.antisense	0.963408	0.343246
AC004461.2.ENSG00000281530.sense_intronic	0.961594	0.343587
LINC00967.ENSG00000253138.lincRNA	0.918264	0.343627
AL596223.2.ENSG00000231748.antisense	0.938265	0.344041
AC087318.1.ENSG00000256714.lincRNA	0.92583	0.344428
P4HA2.AS1.ENSG00000237714.antisense	0.939156	0.3445
OVOL1.AS1.ENSG00000255120.antisense	0.950035	0.344537
AC017076.1.ENSG00000271947.lincRNA	1.06862	0.345905
AL590093.1.ENSG00000230728.sense_overlapping	1.13562	0.346046
AC008870.4.ENSG00000261723.antisense	0.913721	0.346868
AL355073.1.ENSG00000259483.lincRNA	1.02897	0.347499
AL136987.1.ENSG00000232498.antisense	1.03927	0.348302
AC005858.1.ENSG00000275212.lincRNA	1.06466	0.348789
AC104809.1.ENSG00000223991.antisense	0.967275	0.349203
AC024243.1.ENSG00000272969.antisense	1.08469	0.351535
AL162582.1.ENSG00000230234.lincRNA	0.9635	0.351729
LINC00326.ENSG00000231023.lincRNA	1.10822	0.35202
AL162431.2.ENSG00000243155.antisense	0.966449	0.353095
AC002384.1.ENSG00000228742.lincRNA	1.07357	0.35491
AC023090.1.ENSG00000267015.antisense	1.04777	0.35493
AL355802.3.ENSG00000271754.antisense	1.0594	0.355867
AL359397.1.ENSG00000258857.lincRNA	1.08596	0.358735
AL021328.1.ENSG00000269985.antisense	0.963035	0.359925
AC245128.3.ENSG00000268734.lincRNA	0.943559	0.360156
AC009102.1.ENSG00000260198.sense_intronic	1.02285	0.362851
CRNDE.ENSG00000245694.lincRNA	0.97542	0.363991
AC016877.3.ENSG00000271930.lincRNA	0.939641	0.364204
U47924.3.ENSG00000275703.lincRNA	1.06327	0.364928
SCHLAP1.ENSG00000281131.lincRNA	0.913539	0.365392
TBX5.AS1.ENSG00000255399.antisense	1.12749	0.366043
AC124017.1.ENSG00000249341.sense_intronic	1.09428	0.366362
AC074135.1.ENSG00000267886.lincRNA	1.05415	0.366675
HRAT92.ENSG00000223855.lincRNA	0.968689	0.366911
TTC39A.AS1.ENSG00000261664.antisense	0.94995	0.368095
AC005150.1.ENSG00000248431.lincRNA	0.960277	0.368254
LINC02058.ENSG00000248528.lincRNA	1.08215	0.368653
FARSA.AS1.ENSG00000266975.antisense	0.908823	0.369966
AC139099.2.ENSG00000262898.lincRNA	1.02543	0.370187
SFTA1P.ENSG00000225383.lincRNA	0.960123	0.370441
LINC00885.ENSG00000224652.lincRNA	0.966647	0.371118
C7orf71.ENSG00000222004.lincRNA	0.878701	0.371462
LINC01136.ENSG00000233791.lincRNA	0.950995	0.372832
LINC01269.ENSG00000258689.lincRNA	0.935768	0.375016
LINC01950.ENSG00000251027.lincRNA	1.10083	0.376207
C8orf87.ENSG00000279847.lincRNA	1.09102	0.376415
AC093732.2.ENSG00000272814.antisense	1.07747	0.378316
LINC01762.ENSG00000233154.lincRNA	0.948319	0.379962
AL136460.1.ENSG00000230437.lincRNA	1.05355	0.380198
AC013275.1.ENSG00000231013.antisense	0.970401	0.381572
LINC01021.ENSG00000250337.lincRNA	0.971879	0.381765
LINC02473.ENSG00000261121.lincRNA	1.09723	0.381842
AC026310.2.ENSG00000255921.antisense	1.09774	0.382213
AC021517.1.ENSG00000266988.sense_intronic	1.14146	0.382493
AC008060.4.ENSG00000260426.sense_overlapping	1.07799	0.384613
AL355488.2.ENSG00000273373.antisense	0.97598	0.386789
AL139275.2.ENSG00000227131.lincRNA	0.917643	0.386926
AC239868.2.ENSG00000261716.sense_overlapping	0.978891	0.387572
LINC02208.ENSG00000250891.lincRNA	1.09628	0.38802
AL163952.1.ENSG00000259868.processed_transcript	0.944233	0.38859
AC104534.1.ENSG00000268756.antisense	0.96203	0.388956
AL355303.1.ENSG00000224034.lincRNA	0.954601	0.389467
AC012313.4.ENSG00000268307.lincRNA	1.07862	0.390269
AC092490.1.ENSG00000249790.lincRNA	0.97146	0.390294
LINC02267.ENSG00000248510.lincRNA	1.05365	0.390924
AP000525.1.ENSG00000272872.sense_intronic	1.0514	0.39105
AL050349.1.ENSG00000229188.antisense	1.07381	0.392401
AL035446.1.ENSG00000234147.lincRNA	0.960075	0.394335
LINC01885.ENSG00000237880.lincRNA	1.03381	0.395134
AC008556.1.ENSG00000277013.lincRNA	0.965811	0.395539
SLC12A5.AS1.ENSG00000204044.antisense	1.04541	0.396697
AC009902.3.ENSG00000272425.lincRNA	1.06914	0.397574
LINC00607.ENSG00000235770.lincRNA	0.969455	0.398391
AL355472.4.ENSG00000273367.antisense	0.933423	0.399887
FAM225B.ENSG00000225684.lincRNA	1.06273	0.401096
AC004852.2.ENSG00000278254.lincRNA	1.02271	0.40143
AC008696.2.ENSG00000249881.sense_overlapping	1.08334	0.401843
LINC01518.ENSG00000233515.lincRNA	0.936092	0.403212
AC011840.1.ENSG00000231421.processed_transcript	0.946827	0.403708
AC074138.1.ENSG00000276071.lincRNA	1.05623	0.405484
AC091059.1.ENSG00000266002.antisense	1.03434	0.406977
AL731684.1.ENSG00000225532.lincRNA	0.939429	0.408388
AL138900.2.ENSG00000237189.lincRNA	1.07837	0.409301
AC010503.2.ENSG00000268203.antisense	1.04092	0.409592
AC020571.1.ENSG00000229056.antisense	0.951752	0.409873
ZNF341.AS1.ENSG00000230753.antisense	1.05685	0.4099
LINC01085.ENSG00000248698.lincRNA	0.913443	0.410369
BX322234.2.ENSG00000233085.lincRNA	1.07219	0.410555
AC021683.2.ENSG00000267506.lincRNA	0.924866	0.411678
AC026992.1.ENSG00000259504.lincRNA	1.06634	0.413133
SNHG4.ENSG00000281398.processed_transcript	0.968842	0.413364
AL121900.1.ENSG00000233993.antisense	1.18027	0.416024
AP000721.2.ENSG00000256824.antisense	1.1041	0.416352
AC008991.2.ENSG00000267683.lincRNA	1.08311	0.416727
AC107463.2.ENSG00000248456.lincRNA	1.13342	0.417997
AL445483.1.ENSG00000260088.lincRNA	0.949127	0.41891
AL354953.1.ENSG00000224468.antisense	0.946827	0.420232
LINC02421.ENSG00000255970.lincRNA	0.932693	0.421028
AC104958.1.ENSG00000248318.antisense	0.933102	0.422883
AC010280.1.ENSG00000248359.lincRNA	0.939358	0.424009
AC099786.2.ENSG00000224149.antisense	1.10335	0.424533
AC092652.1.ENSG00000231758.antisense	0.879753	0.425819
AL049646.1.ENSG00000230010.lincRNA	0.918042	0.427189
AL358176.1.ENSG00000224359.antisense	1.068	0.428038
TSPEAR.AS1.ENSG00000235890.antisense	0.976052	0.42895
AL353593.2.ENSG00000269934.antisense	1.06224	0.428979
AL512413.1.ENSG00000272088.lincRNA	0.947432	0.429881
AC012413.1.ENSG00000253664.antisense	1.13042	0.430545
LINC01492.ENSG00000225564.lincRNA	1.03985	0.431272
AC100807.1.ENSG00000253783.lincRNA	1.05219	0.431305
AC103769.1.ENSG00000253475.sense_intronic	1.10849	0.431842
NRIR.ENSG00000225964.antisense	0.957868	0.432314
LINC00850.ENSG00000280752.lincRNA	1.0713	0.434538
AC005696.4.ENSG00000277200.lincRNA	0.938386	0.435837
LINC02428.ENSG00000248740.lincRNA	0.977058	0.437666
LINC00624.ENSG00000278811.antisense	0.969096	0.43777
AC010719.1.ENSG00000270933.lincRNA	0.97313	0.439396
ATP2A1.AS1.ENSG00000260442.antisense	0.962465	0.439572
LINC01148.ENSG00000258804.lincRNA	1.0554	0.439684
AC122710.1.ENSG00000250060.lincRNA	0.950533	0.440974
AC138466.1.ENSG00000256312.lincRNA	0.924893	0.442525
LINC01996.ENSG00000261863.lincRNA	1.09657	0.443005
AC026320.1.ENSG00000232353.lincRNA	0.923027	0.446245
AC008443.3.ENSG00000248103.lincRNA	0.939869	0.446689
AC011603.2.ENSG00000257913.antisense	0.957636	0.449381
AC008808.1.ENSG00000248918.lincRNA	1.13536	0.449686
AC108727.2.ENSG00000251270.antisense	1.10205	0.450311
AC113404.1.ENSG00000250348.antisense	0.961349	0.450713
DSCR9.ENSG00000230366.lincRNA	0.948324	0.450802
LINC00458.ENSG00000234787.lincRNA	1.06511	0.451061
AC078993.1.ENSG00000238178.antisense	1.04193	0.454391
KIAA0087.ENSG00000122548.lincRNA	1.04295	0.455454
PGM5P4.AS1.ENSG00000231943.lincRNA	1.09546	0.456461
SLC12A9.AS1.ENSG00000236305.antisense	0.960903	0.456665
AL136379.1.ENSG00000276255.lincRNA	0.927569	0.456877
C17orf82.ENSG00000187013.lincRNA	0.971968	0.457098
AC063980.1.ENSG00000279240.lincRNA	1.0132	0.458503
AC004870.2.ENSG00000223829.processed_transcript	0.948446	0.4586
FLJ36000.ENSG00000276399.lincRNA	1.06487	0.458666
AC107973.1.ENSG00000254734.lincRNA	1.06551	0.459865
SLC7A11.AS1.ENSG00000250033.processed_transcript	0.953105	0.460197
AC068987.3.ENSG00000260473.lincRNA	0.941069	0.46057
AC211433.1.ENSG00000232729.processed_transcript	0.941064	0.46314
AL139041.1.ENSG00000271631.antisense	0.941564	0.463923
LINC01977.ENSG00000262772.lincRNA	0.962342	0.464668
AC018695.6.ENSG00000275393.sense_intronic	1.07147	0.465312
AL133215.2.ENSG00000273162.lincRNA	1.04263	0.46603
AC005323.1.ENSG00000214970.antisense	1.09591	0.467016
AC025272.1.ENSG00000260937.lincRNA	1.07395	0.467134
AC125603.1.ENSG00000257654.lincRNA	1.05449	0.467923
AC012617.1.ENSG00000267053.lincRNA	0.959699	0.468543
SLC9A3.AS1.ENSG00000225138.processed_transcript	0.982712	0.469203
AC024941.2.ENSG00000281333.antisense	0.947433	0.471252
AC090680.2.ENSG00000258338.lincRNA	1.05734	0.471608
AC008741.2.ENSG00000274925.lincRNA	0.975789	0.472362
AC116025.2.ENSG00000262172.sense_intronic	0.955403	0.472801
AC024937.3.ENSG00000260261.lincRNA	0.970979	0.474958
AC132192.2.ENSG00000268403.antisense	0.97586	0.477098
MAFG.AS1.ENSG00000265688.antisense	0.979004	0.477765
AC069277.1.ENSG00000189229.lincRNA	1.0439	0.478187
AL022158.1.ENSG00000224294.lincRNA	1.07272	0.478839
AC124067.2.ENSG00000253414.sense_intronic	0.95559	0.47923
AL355102.5.ENSG00000259036.antisense	0.917106	0.479644
AC012572.1.ENSG00000265378.lincRNA	1.02906	0.48051
LINC00511.ENSG00000227036.lincRNA	0.97749	0.482475
LINC01549.ENSG00000232560.lincRNA	0.974329	0.483787
AC004080.2.ENSG00000253508.lincRNA	0.963962	0.484332
U91328.4.ENSG00000272810.lincRNA	1.04399	0.486447
HCG20.ENSG00000228022.lincRNA	0.958127	0.486901
AC091182.1.ENSG00000253123.processed_transcript	0.971278	0.490026
AL353803.4.ENSG00000261334.lincRNA	1.03386	0.491116
LINC00485.ENSG00000258169.lincRNA	0.939348	0.492904
AF127577.3.ENSG00000235277.antisense	1.06658	0.494241
AL355974.1.ENSG00000274331.lincRNA	1.0314	0.496603
AC026740.1.ENSG00000271781.antisense	0.97384	0.497783
LINC01480.ENSG00000270164.lincRNA	0.971761	0.498274
AC007614.4.ENSG00000260769.lincRNA	1.05303	0.498295
AP000688.2.ENSG00000233393.lincRNA	1.05658	0.499333
WWTR1.IT1.ENSG00000241985.sense_intronic	1.02349	0.499503
LINC01608.ENSG00000253877.lincRNA	0.971327	0.501467
LINC01970.ENSG00000265692.lincRNA	0.963393	0.501684
AC243772.2.ENSG00000233030.antisense	0.954067	0.503047
LINC01257.ENSG00000204603.lincRNA	1.04687	0.503829
AC016987.1.ENSG00000259620.antisense	1.01983	0.504243
AP001922.3.ENSG00000254826.sense_intronic	0.952193	0.50511
AC023347.1.ENSG00000235774.lincRNA	1.05118	0.5055
AC106037.2.ENSG00000265656.antisense	0.940678	0.505848
TLX1NB.ENSG00000236311.processed_transcript	1.05513	0.506904
AC024257.3.ENSG00000269514.lincRNA	0.956891	0.507113
LINC02307.ENSG00000258969.lincRNA	1.05277	0.507289
ZSWIM8.AS1.ENSG00000272589.antisense	1.06592	0.509444
LINC01108.ENSG00000226673.lincRNA	0.970277	0.509691
WARS2.IT1.ENSG00000224238.antisense	0.950999	0.510319
LINC.ROR.ENSG00000258609.lincRNA	1.03677	0.511179
AL160290.2.ENSG00000230131.lincRNA	0.935301	0.511629
LINC00376.ENSG00000227564.lincRNA	0.934015	0.512415
AL133367.1.ENSG00000260285.antisense	0.973154	0.513911
AC104088.1.ENSG00000232555.lincRNA	0.954525	0.515762
AC078909.2.ENSG00000274444.lincRNA	0.961727	0.516209
AC018607.1.ENSG00000254325.sense_intronic	0.919558	0.516455
LINC01029.ENSG00000265843.lincRNA	1.1293	0.517202
AC090241.3.ENSG00000274776.lincRNA	1.04612	0.518241
LINC02241.ENSG00000251629.lincRNA	0.977176	0.518993
AC016590.1.ENSG00000267605.lincRNA	0.954645	0.52137
AC090774.4.ENSG00000266369.antisense	0.933183	0.521946
LINC00484.ENSG00000229694.lincRNA	1.05586	0.522133
Z82249.1.ENSG00000233179.lincRNA	0.901158	0.5248
AC103770.1.ENSG00000254251.antisense	0.94386	0.525037
AC011466.3.ENSG00000269534.antisense	0.949101	0.525247
AL160408.4.ENSG00000241475.lincRNA	0.946162	0.526123
AC099552.1.ENSG00000217825.lincRNA	0.951792	0.52632
AP000553.1.ENSG00000272954.sense_intronic	1.04217	0.526638
FER1L6.AS2.ENSG00000253868.antisense	1.05466	0.526865
AC025171.5.ENSG00000272382.lincRNA	1.03372	0.530337
UNC5B.AS1.ENSG00000237512.antisense	0.952948	0.531091
AC073352.1.ENSG00000272662.lincRNA	1.04438	0.531507
DLEU2L.ENSG00000116652.sense_intronic	1.0196	0.5325
LINC02109.ENSG00000259786.lincRNA	1.02548	0.532599
AL353801.3.ENSG00000273363.sense_intronic	0.963625	0.532727
AC133644.2.ENSG00000273445.antisense	1.03292	0.532781
AL138900.1.ENSG00000228239.lincRNA	0.938492	0.533681
AC106892.1.ENSG00000250791.lincRNA	0.918041	0.533774
AC092155.1.ENSG00000226622.antisense	1.05329	0.534148
LINC01901.ENSG00000267413.lincRNA	1.04932	0.534699
LINC02323.ENSG00000259230.lincRNA	0.96467	0.534751
AL022341.2.ENSG00000262528.antisense	0.947868	0.535058
AC092378.2.ENSG00000261638.lincRNA	1.02586	0.535108
AL592424.1.ENSG00000261168.sense_overlapping	0.977688	0.535575
ENOX1.AS1.ENSG00000233821.lincRNA	1.06871	0.536075
AC096711.3.ENSG00000251598.lincRNA	0.962676	0.536439
AL109954.1.ENSG00000260202.lincRNA	1.0195	0.536569
AP005057.1.ENSG00000264080.lincRNA	0.969522	0.537069
AC090559.2.ENSG00000270072.sense_intronic	1.07059	0.537213
LINC00941.ENSG00000235884.lincRNA	0.969256	0.537577
MIR4300HG.ENSG00000245832.lincRNA	0.94042	0.538198
LINC02159.ENSG00000253417.lincRNA	1.03856	0.539176
AL133166.1.ENSG00000257522.processed_transcript	1.04307	0.540475
AC131254.3.ENSG00000254086.lincRNA	1.08854	0.541451
AC074389.2.ENSG00000231476.lincRNA	1.04344	0.541529
AC073346.1.ENSG00000225457.processed_transcript	1.09867	0.541612
AC099791.2.ENSG00000271200.lincRNA	1.06243	0.542651
MAGI2.AS1.ENSG00000251276.antisense	0.930646	0.542653
AC010463.3.ENSG00000269815.sense_intronic	0.957546	0.543669
MNX1.AS2.ENSG00000235029.antisense	0.949962	0.546616
TEX41.ENSG00000226674.lincRNA	0.981749	0.547122
LINC01297.ENSG00000225255.lincRNA	0.957335	0.547607
AC092332.1.ENSG00000260064.sense_intronic	1.03141	0.548149
MIR7.3HG.ENSG00000176840.lincRNA	1.05254	0.548936
AC110285.2.ENSG00000262877.lincRNA	0.982225	0.550147
LINC01281.ENSG00000235304.lincRNA	1.05026	0.551331
LINC00668.ENSG00000265933.lincRNA	1.02973	0.551448
LINC01507.ENSG00000230945.lincRNA	1.06716	0.55505
CDKN2B.AS1.ENSG00000240498.antisense	0.97816	0.555097
AC112721.2.ENSG00000222032.lincRNA	0.928324	0.556069
ZNF385D.AS1.ENSG00000225542.antisense	0.955637	0.556559
AP003419.4.ENSG00000275484.lincRNA	0.969647	0.557135
AL157778.1.ENSG00000281566.lincRNA	0.970051	0.557868
AC010457.1.ENSG00000251257.antisense	1.04531	0.558332
AC061975.6.ENSG00000266830.lincRNA	1.03156	0.558336
DUXAP8.ENSG00000206195.processed_transcript	0.981579	0.558816
LINC02119.ENSG00000248461.lincRNA	0.971054	0.560013
AC023355.1.ENSG00000259488.antisense	0.971348	0.560827
LINC01419.ENSG00000253898.lincRNA	1.01567	0.562264
AC013451.2.ENSG00000258976.lincRNA	1.04206	0.563057
LINC01117.ENSG00000224577.lincRNA	1.04444	0.563179
AL121992.3.ENSG00000272510.antisense	1.04205	0.563682
LINC01451.ENSG00000279141.lincRNA	0.983298	0.564117
TSPEAR.AS2.ENSG00000182912.antisense	0.981794	0.568304
AC010201.1.ENSG00000271259.lincRNA	1.03628	0.568428
AC016773.1.ENSG00000270195.lincRNA	0.975735	0.568791
AP005059.1.ENSG00000264000.antisense	1.02807	0.569478
KCCAT198.ENSG00000257642.antisense	0.94645	0.57049
AL358613.2.ENSG00000279607.lincRNA	1.0495	0.572509
AC018809.1.ENSG00000269894.sense_intronic	0.969632	0.573529
AC073655.1.ENSG00000258172.antisense	0.94947	0.57506
AL023803.2.ENSG00000274825.lincRNA	1.02971	0.57538
AC067852.1.ENSG00000266929.processed_transcript	1.03613	0.576582
AL138760.1.ENSG00000235939.antisense	1.05871	0.577043
AL592071.1.ENSG00000273980.lincRNA	0.951365	0.578343
AP003174.1.ENSG00000255689.lincRNA	0.968964	0.579508
LINC01019.ENSG00000248118.lincRNA	1.02662	0.581807
AC004877.1.ENSG00000273419.antisense	0.967975	0.582112
LINC00665.ENSG00000232677.lincRNA	0.985922	0.583753
AL138924.1.ENSG00000280560.lincRNA	1.04818	0.585892
LINC02202.ENSG00000245812.lincRNA	0.973621	0.587174
AL451050.2.ENSG00000272205.lincRNA	0.972026	0.587404
AL590079.1.ENSG00000258913.lincRNA	0.969189	0.589295
LINC01524.ENSG00000234948.lincRNA	1.03545	0.589329
LINC00879.ENSG00000239589.lincRNA	0.966556	0.590293
LINC01235.ENSG00000270547.lincRNA	1.02286	0.590953
AC106900.2.ENSG00000270460.lincRNA	1.03104	0.591842
AC005264.1.ENSG00000267551.antisense	0.965196	0.592382
AC130456.3.ENSG00000260592.antisense	0.960551	0.59252
AL139237.1.ENSG00000227029.lincRNA	1.02302	0.593697
AL450442.1.ENSG00000258850.lincRNA	0.964844	0.593843
MYHAS.ENSG00000272975.antisense	0.949148	0.594039
AC114401.1.ENSG00000241884.lincRNA	0.966114	0.59404
LINC01267.ENSG00000251576.lincRNA	0.93684	0.594688
AC022146.2.ENSG00000271717.antisense	1.04206	0.597456
AC007036.1.ENSG00000227017.lincRNA	1.04147	0.598316
AC023824.1.ENSG00000260073.lincRNA	1.04514	0.598792
LINC01929.ENSG00000267013.lincRNA	0.969903	0.60148
LINC01446.ENSG00000205628.lincRNA	0.978424	0.601559
AC004816.1.ENSG00000259153.lincRNA	0.979793	0.601629
LINC00601.ENSG00000235180.lincRNA	1.06795	0.602528
PGM5P3.AS1.ENSG00000277631.lincRNA	0.947745	0.6026
AC104793.1.ENSG00000249568.antisense	0.917979	0.602768
AC023908.3.ENSG00000261136.antisense	0.97463	0.606941
AC092447.8.ENSG00000261275.lincRNA	0.942819	0.606966
IL21.AS1.ENSG00000227145.antisense	0.966212	0.607091
LINC02371.ENSG00000274659.lincRNA	1.01776	0.607165
LINC01570.ENSG00000260338.antisense	1.08035	0.608833
AL118505.1.ENSG00000278192.lincRNA	0.974205	0.610034
AL772363.1.ENSG00000203987.antisense	1.08433	0.610109
LINC02153.ENSG00000253199.lincRNA	1.04294	0.610659
AL162464.1.ENSG00000258601.antisense	1.04025	0.612139
AL596330.1.ENSG00000229400.antisense	0.94775	0.612329
HAO2.IT1.ENSG00000230921.sense_intronic	0.966692	0.614758
NOVA1.AS1.ENSG00000257842.antisense	0.97348	0.616469
AC026741.1.ENSG00000272103.lincRNA	0.960379	0.620154
AC104365.1.ENSG00000267476.antisense	1.02586	0.620321
AC019183.1.ENSG00000266450.lincRNA	0.961593	0.620366
AC012668.1.ENSG00000227981.lincRNA	0.944891	0.621016
AC105137.3.ENSG00000276744.sense_intronic	0.968928	0.621094
AC105999.2.ENSG00000253802.lincRNA	0.929098	0.621675
AC096642.1.ENSG00000277007.lincRNA	1.05092	0.623752
AC018904.2.ENSG00000259476.sense_intronic	0.971422	0.625582
AC005670.1.ENSG00000261886.lincRNA	1.04225	0.62748
AC087627.1.ENSG00000253983.antisense	1.038	0.627945
LINC02211.ENSG00000245662.lincRNA	0.969489	0.628283
AL136162.1.ENSG00000271888.lincRNA	0.978587	0.628818
AC099542.2.ENSG00000242145.lincRNA	1.0379	0.629338
AL136537.2.ENSG00000261761.processed_transcript	0.973903	0.629613
LINC01667.ENSG00000280081.lincRNA	0.980487	0.632898
LINC01632.ENSG00000277199.lincRNA	0.963642	0.633641
AP002957.1.ENSG00000255345.lincRNA	0.950415	0.633744
AL450992.1.ENSG00000229021.antisense	1.04933	0.634458
FP325330.3.ENSG00000279712.lincRNA	0.963914	0.634588
AC079466.1.ENSG00000266976.lincRNA	1.01391	0.635478
AC114316.2.ENSG00000250049.lincRNA	0.975687	0.637798
CHL1.AS2.ENSG00000224318.processed_transcript	1.03463	0.638355
AC092343.1.ENSG00000247345.antisense	0.953301	0.638404
LINC00336.ENSG00000197251.lincRNA	0.948036	0.638643
AL359313.1.ENSG00000236366.lincRNA	0.96907	0.638681
AC106017.2.ENSG00000281856.lincRNA	1.05437	0.638892
AC068831.8.ENSG00000278514.lincRNA	1.05459	0.638913
AP005229.1.ENSG00000267051.lincRNA	1.08072	0.639355
AC089983.1.ENSG00000257732.antisense	0.9517	0.640105
C20orf166.AS1.ENSG00000174403.antisense	0.964959	0.641821
AC068535.1.ENSG00000227157.lincRNA	0.978919	0.64486
LINC01287.ENSG00000234722.lincRNA	1.01376	0.646781
LINC01615.ENSG00000223485.lincRNA	0.972448	0.647292
AC006305.1.ENSG00000206129.lincRNA	0.976177	0.648561
C3orf67.AS1.ENSG00000242428.antisense	0.970835	0.648591
LINC00189.ENSG00000215533.sense_overlapping	0.979202	0.648641
AL133370.1.ENSG00000258837.antisense	0.969577	0.650215
MIR217HG.ENSG00000226702.lincRNA	0.977396	0.651164
AC060834.2.ENSG00000234710.lincRNA	0.957391	0.65232
LINC02475.ENSG00000251350.lincRNA	1.02416	0.653134
AL391056.1.ENSG00000227619.lincRNA	0.981615	0.653199
AC009902.2.ENSG00000254027.antisense	1.03974	0.653463
AC026369.3.ENSG00000256948.antisense	1.03202	0.653834
AC090337.1.ENSG00000264705.lincRNA	1.04065	0.654871
MIR2052HG.ENSG00000254349.lincRNA	0.972087	0.654963
AL583785.1.ENSG00000226197.lincRNA	0.969117	0.655879
AL450998.2.ENSG00000224459.antisense	0.96791	0.656311
AC078860.1.ENSG00000257761.antisense	0.962666	0.657642
AL138720.1.ENSG00000234261.lincRNA	1.04611	0.657805
STAM.AS1.ENSG00000260589.antisense	0.97398	0.658187
AC011773.4.ENSG00000260493.antisense	0.963294	0.659026
SPATA3.AS1.ENSG00000238062.lincRNA	0.973212	0.659473
LHFPL3.AS2.ENSG00000225329.processed_transcript	0.98151	0.660426
AC069272.1.ENSG00000250354.antisense	1.04861	0.662532
KIZ.AS1.ENSG00000232712.antisense	0.967299	0.662643
AC009987.1.ENSG00000231138.antisense	0.983841	0.663591
AC073323.1.ENSG00000232524.antisense	0.952493	0.664392
LINC01361.ENSG00000236268.lincRNA	0.963189	0.66443
AC112493.1.ENSG00000242021.lincRNA	0.975107	0.665298
AC096734.1.ENSG00000251517.lincRNA	0.961083	0.666598
LINC01914.ENSG00000234362.lincRNA	0.975936	0.666845
AL117338.1.ENSG00000223470.lincRNA	0.946385	0.669337
Z95114.2.ENSG00000279714.lincRNA	1.0353	0.671668
LINC02313.ENSG00000258474.lincRNA	0.976421	0.673192
AC002550.1.ENSG00000261312.antisense	0.96093	0.673648
AL024498.1.ENSG00000272097.lincRNA	0.974437	0.67781
LINC01589.ENSG00000238120.antisense	0.977103	0.678452
FAM87A.ENSG00000182366.lincRNA	0.97664	0.678611
AC010247.2.ENSG00000259436.antisense	0.984066	0.679362
KCNMB2.AS1.ENSG00000237978.antisense	0.984455	0.68036
AC134312.4.ENSG00000261193.lincRNA	1.04516	0.680833
LINC01516.ENSG00000231422.lincRNA	0.987061	0.680936
AL109976.1.ENSG00000277287.lincRNA	0.97842	0.68144
LINC01775.ENSG00000267201.lincRNA	1.03663	0.681803
AC096711.1.ENSG00000249463.lincRNA	0.971456	0.684033
AP000439.1.ENSG00000255606.lincRNA	0.955799	0.685552
AC245595.1.ENSG00000232527.lincRNA	1.02231	0.685568
AC023824.6.ENSG00000261800.lincRNA	1.03085	0.685582
AC091057.3.ENSG00000269974.lincRNA	1.02277	0.685993
AC103724.4.ENSG00000271938.lincRNA	0.983219	0.686742
AC010624.2.ENSG00000267890.lincRNA	0.971397	0.687215
AC008060.1.ENSG00000218672.lincRNA	1.03536	0.687746
AC008750.3.ENSG00000267905.antisense	0.973151	0.687858
AC097478.1.ENSG00000251095.antisense	0.979775	0.690471
CASC9.ENSG00000249395.lincRNA	1.01204	0.690778
AL121906.2.ENSG00000275223.lincRNA	0.982899	0.69102
LINC01793.ENSG00000222030.lincRNA	0.973302	0.691021
AC008655.1.ENSG00000267815.antisense	1.02562	0.691706
AC100803.3.ENSG00000271959.antisense	0.981416	0.694793
AC020928.1.ENSG00000267260.lincRNA	1.0208	0.695226
AC004477.1.ENSG00000263412.processed_transcript	0.984403	0.696424
AC131532.1.ENSG00000258815.lincRNA	0.974995	0.698156
AL359694.2.ENSG00000261568.lincRNA	1.01957	0.698325
IGFL2.AS1.ENSG00000268621.lincRNA	1.02917	0.698948
AC113383.1.ENSG00000250320.antisense	0.969925	0.700442
AC009121.2.ENSG00000263080.antisense	1.02483	0.702309
AC040174.2.ENSG00000269986.sense_intronic	1.0441	0.702422
AC090358.1.ENSG00000265217.lincRNA	0.975263	0.703146
AC092794.2.ENSG00000275197.antisense	1.03881	0.703767
FOXD2.AS1.ENSG00000237424.antisense	0.989612	0.70408
AL713965.1.ENSG00000227687.antisense	0.9637	0.705257
AP000593.3.ENSG00000255843.antisense	0.981884	0.705316
AP001599.1.ENSG00000223563.antisense	0.948199	0.705475
LINC02114.ENSG00000249521.lincRNA	1.03398	0.705829
AC025016.1.ENSG00000255257.lincRNA	1.01904	0.70592
TCL6.ENSG00000187621.processed_transcript	1.01721	0.706022
AC118555.1.ENSG00000235096.antisense	1.02818	0.706208
VAC14.AS1.ENSG00000214353.antisense	0.987147	0.706748
LINC00685.ENSG00000226179.antisense	0.983634	0.707612
AC119424.1.ENSG00000243384.antisense	0.980915	0.707874
ZIM2.AS1.ENSG00000269793.antisense	0.977786	0.708613
LINC01967.ENSG00000235493.lincRNA	1.03659	0.709264
AC034228.1.ENSG00000223548.antisense	0.964203	0.710273
AC023302.1.ENSG00000271983.lincRNA	0.969753	0.711603
AC008109.1.ENSG00000266602.lincRNA	0.985408	0.712042
HOXC13.AS.ENSG00000249641.antisense	0.935997	0.713154
AL359878.1.ENSG00000205740.processed_transcript	0.978948	0.713576
AL139412.1.ENSG00000236947.lincRNA	0.985475	0.714718
AC069222.1.ENSG00000273374.lincRNA	0.976378	0.71537
AC007638.1.ENSG00000262079.lincRNA	1.0511	0.715458
KCNMA1.AS2.ENSG00000225497.antisense	1.04086	0.715808
AC007064.2.ENSG00000237689.lincRNA	0.965002	0.715906
AL121890.4.ENSG00000277425.lincRNA	0.965479	0.716147
AC010997.5.ENSG00000273248.lincRNA	1.02957	0.718001
AC018553.1.ENSG00000277559.lincRNA	0.986961	0.719447
LINC01551.ENSG00000186960.lincRNA	1.06774	0.719963
AC010503.1.ENSG00000268191.antisense	1.02265	0.720151
AC090568.2.ENSG00000253553.antisense	1.02813	0.720916
AL445228.2.ENSG00000271387.lincRNA	0.979662	0.721917
LINC00173.ENSG00000196668.processed_transcript	1.02162	0.721927
AC013448.2.ENSG00000235610.lincRNA	1.01678	0.722143
LINC00689.ENSG00000231419.processed_transcript	1.015	0.723965
AP005230.1.ENSG00000263745.lincRNA	1.02325	0.724189
AC141930.2.ENSG00000231482.lincRNA	1.01247	0.725945
AP002449.1.ENSG00000266969.antisense	1.01274	0.728416
WFDC21P.ENSG00000261040.processed_transcript	0.986944	0.728737
AC011632.1.ENSG00000253706.antisense	1.0179	0.729985
AL356417.2.ENSG00000233682.antisense	1.0305	0.732245
AC107419.1.ENSG00000228933.lincRNA	0.983466	0.73336
AL033384.2.ENSG00000271218.antisense	0.97485	0.734123
LINC01585.ENSG00000245479.sense_overlapping	1.01691	0.735334
AL109807.1.ENSG00000238034.lincRNA	1.05128	0.735372
SAMMSON.ENSG00000240405.lincRNA	0.969487	0.742924
AC068870.1.ENSG00000260619.lincRNA	0.978708	0.743022
LINC01204.ENSG00000229563.lincRNA	0.963915	0.744282
AL358072.1.ENSG00000271427.lincRNA	0.980123	0.745411
AL117355.1.ENSG00000257636.antisense	0.980905	0.745661
AC055878.1.ENSG00000255357.lincRNA	1.01217	0.746122
AC074033.2.ENSG00000241479.antisense	0.967302	0.746162
LINC01116.ENSG00000163364.lincRNA	1.01303	0.746383
AL645608.9.ENSG00000273443.lincRNA	0.983675	0.747166
AC008875.1.ENSG00000271788.lincRNA	1.02019	0.748434
AL353658.2.ENSG00000280936.antisense	0.96577	0.748581
AL021807.1.ENSG00000272468.lincRNA	0.985435	0.749147
LINC01792.ENSG00000237166.lincRNA	1.0234	0.749165
AC239803.4.ENSG00000274372.lincRNA	1.01961	0.749185
TDRG1.ENSG00000204091.antisense	0.969767	0.749276
AC096577.1.ENSG00000248373.lincRNA	0.960429	0.749907
AC012073.1.ENSG00000271936.antisense	1.01501	0.751223
AL356215.1.ENSG00000255521.antisense	0.977575	0.751359
DSCAM.IT1.ENSG00000233756.sense_intronic	1.01569	0.751554
LINC00683.ENSG00000266256.lincRNA	0.971089	0.75172
AC002463.1.ENSG00000223646.lincRNA	1.022	0.751728
SRGAP3.AS2.ENSG00000228723.antisense	1.04109	0.753851
AL391832.1.ENSG00000237520.lincRNA	0.984202	0.75608
AC005537.1.ENSG00000232006.lincRNA	1.01874	0.75612
AC097512.1.ENSG00000248837.lincRNA	1.01869	0.756555
AC079062.1.ENSG00000263711.processed_transcript	1.01188	0.758398
AC013553.3.ENSG00000277351.antisense	1.02243	0.758833
LINC02466.ENSG00000246876.lincRNA	1.02204	0.760225
AC025575.2.ENSG00000258053.lincRNA	0.982539	0.76026
AC233280.1.ENSG00000229178.lincRNA	0.980042	0.762636
LINC00958.ENSG00000251381.lincRNA	1.01671	0.762692
AL450468.2.ENSG00000261055.lincRNA	1.02921	0.763565
LINC02152.ENSG00000261319.lincRNA	0.979218	0.763878
AC106820.2.ENSG00000259895.antisense	1.01966	0.764368
AC010615.2.ENSG00000268119.processed_transcript	0.986897	0.76488
AC107393.2.ENSG00000251676.lincRNA	0.979658	0.765581
LINC00581.ENSG00000280989.lincRNA	1.06311	0.766553
AC073941.1.ENSG00000259255.lincRNA	1.01883	0.766564
AL353708.3.ENSG00000272906.lincRNA	0.986643	0.768071
LINC01730.ENSG00000275491.lincRNA	1.01776	0.768122
DDX11.AS1.ENSG00000245614.antisense	0.986552	0.769312
AC093895.1.ENSG00000249001.antisense	0.985478	0.771071
LINC02154.ENSG00000235385.lincRNA	1.02164	0.77207
AC107396.1.ENSG00000251049.lincRNA	0.97189	0.772819
BX255923.1.ENSG00000225655.lincRNA	1.01255	0.773093
MYLK.AS1.ENSG00000239523.antisense	0.988859	0.773252
AL445647.1.ENSG00000272046.lincRNA	1.01843	0.774034
AC013400.1.ENSG00000271991.lincRNA	0.977217	0.774925
LINC01224.ENSG00000269416.lincRNA	1.01078	0.774967
LINC01854.ENSG00000204460.lincRNA	0.972678	0.775864
AC084030.1.ENSG00000232328.lincRNA	1.02199	0.776124
AC011287.1.ENSG00000229618.lincRNA	0.967271	0.778466
AL139042.1.ENSG00000234426.lincRNA	0.979177	0.77979
AC020892.1.ENSG00000259241.lincRNA	0.924363	0.779886
AC010789.1.ENSG00000224817.lincRNA	0.973599	0.780314
LINC01818.ENSG00000230645.lincRNA	0.980995	0.781328
AC097521.2.ENSG00000250590.lincRNA	0.982895	0.78173
AC092264.1.ENSG00000229846.antisense	1.01872	0.782649
LINC02334.ENSG00000274317.lincRNA	1.01155	0.783209
AC092059.1.ENSG00000239991.lincRNA	0.979426	0.787916
AC010401.2.ENSG00000262732.antisense	0.974034	0.78802
LINC01666.ENSG00000279579.lincRNA	1.01545	0.789063
AL590369.1.ENSG00000234789.antisense	1.02441	0.789214
AFAP1.AS1.ENSG00000272620.antisense	0.988605	0.790609
AC132872.2.ENSG00000264548.antisense	0.985651	0.792269
AC007406.2.ENSG00000255746.sense_intronic	0.98894	0.792953
LINC02158.ENSG00000225611.antisense	0.988942	0.794103
AL137060.1.ENSG00000274270.sense_intronic	1.01341	0.794284
AC122710.3.ENSG00000272071.lincRNA	0.980529	0.795891
U73166.1.ENSG00000230454.lincRNA	1.01138	0.796918
CCDC13.AS1.ENSG00000173811.antisense	0.986678	0.796944
AP004147.1.ENSG00000250493.antisense	1.0182	0.797216
AC108865.2.ENSG00000272218.lincRNA	1.03206	0.799403
AC020934.1.ENSG00000267424.antisense	0.977098	0.800452
AC092119.2.ENSG00000274460.processed_transcript	0.98303	0.800781
AP003390.1.ENSG00000254854.antisense	1.01653	0.801799
C2orf48.ENSG00000163009.lincRNA	1.0131	0.80345
AP001476.1.ENSG00000224413.lincRNA	1.0187	0.804251
AC135012.1.ENSG00000261177.lincRNA	0.987119	0.805562
AC128689.1.ENSG00000240086.processed_transcript	1.01826	0.806887
AP000526.1.ENSG00000271127.sense_intronic	1.02219	0.807826
LINC00648.ENSG00000259129.lincRNA	1.01164	0.808731
AL117329.1.ENSG00000224271.lincRNA	0.987261	0.808785
AC007128.1.ENSG00000229970.antisense	1.01511	0.810396
AC009005.1.ENSG00000267751.antisense	1.00872	0.810418
AC040174.1.ENSG00000261502.processed_transcript	0.976866	0.812132
AL513164.1.ENSG00000224658.antisense	1.03271	0.81231
AC006064.3.ENSG00000255966.antisense	0.985793	0.812687
AC106038.1.ENSG00000246792.antisense	1.01707	0.814268
AC009275.1.ENSG00000273297.lincRNA	0.990694	0.814758
AC100872.1.ENSG00000263443.lincRNA	1.00944	0.815075
WT1.AS.ENSG00000183242.antisense	1.01082	0.816481
PPFIA2.AS1.ENSG00000257467.lincRNA	0.986316	0.816912
AL137026.2.ENSG00000237590.lincRNA	0.981358	0.819935
AC234772.2.ENSG00000231566.lincRNA	0.980407	0.819998
AP000844.2.ENSG00000238117.antisense	1.02024	0.822578
LINC01748.ENSG00000226476.lincRNA	0.988799	0.823897
AL359881.2.ENSG00000270035.lincRNA	1.01539	0.825587
AC006455.8.ENSG00000244550.processed_transcript	0.981599	0.826616
CLRN1.AS1.ENSG00000239265.antisense	1.01554	0.826729
AL121721.1.ENSG00000243810.antisense	0.981685	0.826937
AL355987.4.ENSG00000273066.processed_transcript	0.991407	0.828896
AC010333.1.ENSG00000259876.antisense	0.986501	0.832086
AC211476.2.ENSG00000272843.antisense	1.01566	0.834379
AC107886.1.ENSG00000255372.antisense	1.0339	0.835559
LINC01248.ENSG00000224128.antisense	0.988875	0.835809
AP003469.2.ENSG00000253395.lincRNA	0.986777	0.83626
LINC02163.ENSG00000251026.lincRNA	0.989573	0.836465
LINC00942.ENSG00000249628.lincRNA	0.989661	0.836773
AL355607.1.ENSG00000228216.lincRNA	1.01433	0.837477
AP000915.1.ENSG00000264514.lincRNA	0.981517	0.838047
AC139769.2.ENSG00000267924.lincRNA	1.01147	0.838576
LINC01976.ENSG00000261514.lincRNA	1.02021	0.838606
PRKG1.AS1.ENSG00000236671.antisense	0.981429	0.839017
AC007848.1.ENSG00000255983.lincRNA	1.01629	0.839742
AL109754.1.ENSG00000243961.lincRNA	0.984203	0.840294
AL110292.1.ENSG00000258081.lincRNA	0.986106	0.841387
DSCR4.IT1.ENSG00000223608.sense_intronic	1.01674	0.841944
AL132655.2.ENSG00000268649.lincRNA	1.01521	0.846311
LINC02416.ENSG00000257924.lincRNA	0.982462	0.846475
AC114811.2.ENSG00000260641.antisense	0.989267	0.84654
AL606760.3.ENSG00000259818.antisense	1.0077	0.850234
LINC00943.ENSG00000189238.lincRNA	0.987801	0.851145
LINC00114.ENSG00000223806.lincRNA	0.988343	0.851577
AC091987.1.ENSG00000253584.lincRNA	0.989819	0.851857
AC006065.4.ENSG00000256732.lincRNA	0.988954	0.854091
ADGRD1.AS1.ENSG00000256151.lincRNA	1.01114	0.854495
AC016737.1.ENSG00000271151.lincRNA	0.990669	0.854982
AL513318.2.ENSG00000269994.lincRNA	1.01036	0.855072
AC024230.1.ENSG00000248515.lincRNA	1.00895	0.856461
AC068506.1.ENSG00000278464.lincRNA	1.00921	0.859194
AC126773.2.ENSG00000260577.antisense	0.982418	0.860566
AL035401.1.ENSG00000233358.lincRNA	1.01125	0.861052
BX649601.1.ENSG00000273473.lincRNA	0.991717	0.862846
AC106771.1.ENSG00000248783.lincRNA	0.989463	0.863581
CLDN10.AS1.ENSG00000223392.antisense	1.01819	0.863594
IBA57.AS1.ENSG00000203684.lincRNA	0.988833	0.863769
AL033527.3.ENSG00000261798.antisense	1.01187	0.864432
AC044840.1.ENSG00000266696.antisense	1.01009	0.864547
LINC02275.ENSG00000248319.lincRNA	0.991222	0.865011
AC009148.1.ENSG00000260495.antisense	0.989761	0.867455
LINC00609.ENSG00000257585.lincRNA	1.03275	0.868022
NCOA7.AS1.ENSG00000232131.antisense	0.986435	0.86808
LINC01012.ENSG00000281706.lincRNA	1.01318	0.868502
AL133410.1.ENSG00000227388.lincRNA	0.991815	0.870873
AL353803.1.ENSG00000226355.lincRNA	1.01599	0.870996
DPP10.AS1.ENSG00000235026.antisense	1.00791	0.87139
AC125608.1.ENSG00000223812.lincRNA	1.01163	0.871904
LINC02384.ENSG00000251301.lincRNA	0.99436	0.873045
AC011352.1.ENSG00000248362.antisense	1.01481	0.873271
AC022447.5.ENSG00000249114.sense_intronic	1.09862	0.873334
AC011503.1.ENSG00000269289.antisense	1.00785	0.87335
LINC02445.ENSG00000257750.lincRNA	0.984465	0.874031
LINC01511.ENSG00000250584.lincRNA	1.01197	0.874059
HOXA11.AS.ENSG00000240990.antisense	1.00898	0.874371
EPHA5.AS1.ENSG00000250846.lincRNA	0.982937	0.875382
LINC01646.ENSG00000232596.lincRNA	1.00695	0.875398
SLC5A4.AS1.ENSG00000242082.antisense	1.01292	0.875444
AC211486.5.ENSG00000277675.antisense	0.979488	0.876733
AL589182.1.ENSG00000258314.lincRNA	1.01058	0.877606
AL355388.2.ENSG00000273002.antisense	0.991882	0.877976
LINC02027.ENSG00000243694.lincRNA	0.993945	0.878094
AC124944.3.ENSG00000273009.lincRNA	0.987827	0.878153
AL391845.2.ENSG00000233542.antisense	1.00773	0.878945
AP000757.2.ENSG00000254844.antisense	1.00775	0.879843
AF240627.1.ENSG00000230233.lincRNA	1.00877	0.880737
LINC00598.ENSG00000215483.lincRNA	0.991401	0.881244
AC011352.3.ENSG00000251320.antisense	1.01312	0.881475
LINC00628.ENSG00000280924.lincRNA	0.990453	0.882437
LINC01956.ENSG00000258910.lincRNA	1.00827	0.882999
AC074135.2.ENSG00000269543.lincRNA	0.983757	0.883066
AL445209.1.ENSG00000271776.antisense	1.01073	0.883248
LINC00906.ENSG00000267339.lincRNA	1.01259	0.883692
MAPT.IT1.ENSG00000279685.sense_intronic	0.990306	0.88628
LINC00993.ENSG00000235687.lincRNA	0.9872	0.887421
LINC01416.ENSG00000260930.lincRNA	1.01467	0.887702
AL162726.4.ENSG00000232749.lincRNA	0.985878	0.888152
MELTF.AS1.ENSG00000228109.antisense	1.0051	0.888277
ANKRD62P1.PARP4P3.ENSG00000189295.processed_transcript	1.00461	0.889663
AC109588.1.ENSG00000250038.lincRNA	1.00699	0.89018
AC022679.1.ENSG00000253857.lincRNA	1.01322	0.890533
AL512652.1.ENSG00000275485.sense_intronic	0.990232	0.891108
AC003991.1.ENSG00000228113.antisense	0.994613	0.89146
AC007099.1.ENSG00000231172.antisense	0.991238	0.892825
AC079203.2.ENSG00000259468.antisense	1.00976	0.893085
SSTR5.AS1.ENSG00000261713.processed_transcript	0.995382	0.893568
MNX1.AS1.ENSG00000243479.lincRNA	0.993411	0.894992
AC141928.1.ENSG00000250986.lincRNA	0.994047	0.895142
LINC02438.ENSG00000248238.lincRNA	0.995427	0.895699
AC108868.1.ENSG00000231505.lincRNA	1.01364	0.896431
AC138761.4.ENSG00000264956.lincRNA	1.0112	0.89659
AC092159.2.ENSG00000233296.antisense	0.991801	0.896951
AC092954.1.ENSG00000272797.lincRNA	1.01221	0.898538
AC073641.1.ENSG00000228802.antisense	1.00571	0.899318
AC006538.1.ENSG00000261342.sense_intronic	1.00602	0.899724
AC002127.2.ENSG00000233420.lincRNA	0.98975	0.901588
AC018648.1.ENSG00000272905.lincRNA	0.991761	0.902131
LINC01105.ENSG00000232044.processed_transcript	0.987244	0.903318
LINC01777.ENSG00000235054.lincRNA	0.979386	0.903872
AC100823.1.ENSG00000237061.sense_intronic	1.00985	0.904459
AL583808.1.ENSG00000225087.lincRNA	0.986685	0.907141
AL954650.1.ENSG00000228215.lincRNA	0.992124	0.907203
AP002754.1.ENSG00000250230.lincRNA	0.984237	0.90723
AL117350.1.ENSG00000237481.antisense	0.991749	0.908041
AC008742.1.ENSG00000267650.antisense	1.00827	0.90852
AC026992.2.ENSG00000261634.antisense	0.993223	0.910016
LINC00221.ENSG00000270816.lincRNA	0.996591	0.911736
AC018554.1.ENSG00000261436.lincRNA	1.00606	0.913067
SOX21.AS1.ENSG00000227640.lincRNA	0.990103	0.913382
LINC01980.ENSG00000225548.lincRNA	0.995848	0.913648
HAGLR.ENSG00000224189.antisense	1.00309	0.914369
NPSR1.AS1.ENSG00000197085.processed_transcript	0.994861	0.915089
AL138737.1.ENSG00000236013.lincRNA	1.00707	0.915217
LINC02404.ENSG00000257893.lincRNA	1.0045	0.917662
B3GALT5.AS1.ENSG00000184809.antisense	1.00854	0.919533
AL138767.1.ENSG00000196566.antisense	1.00847	0.925261
AC034195.1.ENSG00000223727.lincRNA	0.996171	0.926235
LINC01896.ENSG00000263146.lincRNA	1.02291	0.926503
LINC02055.ENSG00000254101.lincRNA	0.996321	0.927898
AL359881.1.ENSG00000269978.lincRNA	0.994191	0.928575
AC067930.2.ENSG00000254741.antisense	1.02173	0.929249
WASIR2.ENSG00000231439.lincRNA	0.993089	0.929696
AC025254.1.ENSG00000258125.lincRNA	1.00439	0.930615
AC006387.1.ENSG00000243193.processed_transcript	0.99504	0.932618
AC009303.2.ENSG00000235066.antisense	1.00862	0.936021
AL359881.3.ENSG00000270171.lincRNA	0.993411	0.936079
MIR663AHG.ENSG00000227195.processed_transcript	1.00434	0.937178
LINC00944.ENSG00000256128.lincRNA	0.996854	0.937592
AC139722.1.ENSG00000251059.antisense	1.01527	0.93766
LINC02413.ENSG00000257345.lincRNA	1.00442	0.939215
TFAP2A.AS1.ENSG00000229950.antisense	0.996542	0.93925
AC007950.2.ENSG00000276651.lincRNA	1.00354	0.940206
AC068189.1.ENSG00000245080.antisense	0.99345	0.94024
AC092957.1.ENSG00000243620.antisense	1.00444	0.941076
AC068858.1.ENSG00000254654.lincRNA	1.00401	0.942119
AL121782.1.ENSG00000278153.lincRNA	0.994093	0.942926
AC025580.1.ENSG00000259342.antisense	0.995174	0.943204
AC021491.2.ENSG00000250286.processed_transcript	0.994502	0.943447
AC022903.1.ENSG00000264622.lincRNA	1.00577	0.944643
AL590652.1.ENSG00000227885.lincRNA	0.995726	0.944731
LINC01833.ENSG00000259439.lincRNA	1.00293	0.945491
AC006213.3.ENSG00000267191.antisense	0.996618	0.948651
AC099792.1.ENSG00000231252.lincRNA	1.00406	0.94954
AC131391.1.ENSG00000260601.sense_intronic	1.00469	0.949652
LINC01697.ENSG00000232079.processed_transcript	0.996352	0.952044
LINC01139.ENSG00000215808.lincRNA	0.997662	0.952602
LINC02188.ENSG00000261175.lincRNA	1.0033	0.952641
AC009271.1.ENSG00000267327.lincRNA	0.995956	0.954236
AC008033.3.ENSG00000273824.lincRNA	1.00279	0.955951
AC026336.3.ENSG00000276122.lincRNA	1.0071	0.95615
AC024560.1.ENSG00000236833.lincRNA	0.996832	0.956955
AP001432.1.ENSG00000242553.lincRNA	1.00345	0.957318
AC010595.1.ENSG00000250874.lincRNA	1.00311	0.957374
PART1.ENSG00000152931.lincRNA	1.00266	0.957908
AC018521.7.ENSG00000266821.lincRNA	1.00448	0.958803
AC096637.2.ENSG00000231057.antisense	0.99596	0.959157
AC090049.1.ENSG00000257863.lincRNA	1.00539	0.959752
AC005393.1.ENSG00000276445.lincRNA	1.00352	0.959763
LINC02050.ENSG00000242781.lincRNA	0.995387	0.96042
AP001205.1.ENSG00000253740.antisense	0.994225	0.960728
AC011498.7.ENSG00000267769.antisense	0.997407	0.963927
LINC01535.ENSG00000226686.lincRNA	0.998034	0.963997
AL139220.2.ENSG00000230615.lincRNA	1.00234	0.965403
LINC00460.ENSG00000233532.lincRNA	0.995566	0.965517
SACS.AS1.ENSG00000229558.lincRNA	1.00264	0.965662
LINC01353.ENSG00000231507.lincRNA	1.0027	0.965914
LINC02137.ENSG00000260186.lincRNA	0.995026	0.966054
AL139023.1.ENSG00000257869.lincRNA	1.00243	0.966298
LINC01483.ENSG00000227517.lincRNA	0.996287	0.967106
AC006206.2.ENSG00000256417.lincRNA	1.00212	0.967594
AC006252.1.ENSG00000243224.antisense	0.997769	0.968742
LINC01194.ENSG00000248131.lincRNA	0.998267	0.968783
AC126175.1.ENSG00000277738.lincRNA	0.996516	0.969645
AC021321.1.ENSG00000271966.lincRNA	0.997876	0.970721
AC092171.4.ENSG00000272953.lincRNA	0.998242	0.970954
LINC02365.ENSG00000254233.lincRNA	1.00111	0.970957
AC135371.1.ENSG00000226434.lincRNA	1.00309	0.971194
LINC01694.ENSG00000233922.lincRNA	0.998491	0.971997
LINC02200.ENSG00000250358.lincRNA	1.00157	0.973088
AC010307.2.ENSG00000248245.antisense	0.997106	0.974358
AL354714.1.ENSG00000198358.antisense	0.997428	0.974828
RASGRF2.AS1.ENSG00000251450.antisense	0.997518	0.976278
AC097717.1.ENSG00000232732.processed_transcript	1.00247	0.976748
AC112484.4.ENSG00000261159.lincRNA	0.998843	0.977192
AC016710.1.ENSG00000229131.lincRNA	0.998486	0.978345
AC025176.1.ENSG00000250081.lincRNA	0.998206	0.979224
AL355803.1.ENSG00000237371.antisense	0.99859	0.980283
AL121899.1.ENSG00000226644.lincRNA	1.00084	0.981211
AL080312.2.ENSG00000275358.lincRNA	1.00196	0.981544
AC023669.2.ENSG00000237760.lincRNA	0.998971	0.981632
AL031705.1.ENSG00000260646.lincRNA	0.998213	0.983473
AC097478.3.ENSG00000276542.antisense	0.997048	0.983816
AC009248.2.ENSG00000278351.sense_intronic	1.00116	0.985454
AC079089.1.ENSG00000246528.antisense	1.00132	0.986834
AL355102.4.ENSG00000258793.antisense	0.99949	0.988726
AL360093.1.ENSG00000223842.lincRNA	1.00095	0.99023
LINC02082.ENSG00000242268.lincRNA	0.999093	0.990325
AC011445.2.ENSG00000269246.lincRNA	0.999463	0.990584
AC090186.1.ENSG00000272076.lincRNA	1.0008	0.990836
LINC00839.ENSG00000185904.lincRNA	0.999506	0.991165
LINC01675.ENSG00000234142.lincRNA	0.999348	0.992173
AC112251.1.ENSG00000251129.lincRNA	0.999693	0.992777
AC126118.1.ENSG00000271993.antisense	1.00042	0.994129
LINC01747.ENSG00000230400.lincRNA	0.999607	0.996462
AC087525.1.ENSG00000259459.lincRNA	0.999676	0.996596
AL670729.1.ENSG00000231563.antisense	0.999901	0.998819
AL512506.1.ENSG00000274001.sense_intronic	1.00003	0.999733
